# Supplementary material
Source: PubMed Central journal article supplement (PMC4254530)
Supplement: NIHMS631840-supplement.pdf [file NIHMS631840-supplement.pdf]

# Discovery of thienoquinolone derivatives as selective and ATP non-competitive CDK5/p25 inhibitors by structure-based virtual screening

Arindam Chatterjee,<sup>a</sup> Stephen J. Cutler,<sup>a,\*</sup> Robert J. Doerksen,<sup>a</sup> Ikhlas A. Khan,<sup>b</sup> and John S. Williamson<sup>a, c,\*</sup>

<sup>a</sup> Department of Medicinal Chemistry, School of Pharmacy, University of Mississippi, MS, 38677, USA;

<sup>b</sup> National Center for Natural Product Research, University of Mississippi, MS 38677, USA;

<sup>c</sup> Division of Extramural Research, National Center for Complementary and Alternative Medicine, National Institutes of Health, 6707 Democracy Blvd, Suite 401 Bethesda, MD 20892-5475, USA

E-mail: [john.williamson@nih.gov](mailto:john.williamson@nih.gov); E-mail: [cutler@olemiss.edu](mailto:cutler@olemiss.edu)

## Table of Contents

|                                                                             |    |
|-----------------------------------------------------------------------------|----|
| Table T1: Ensemble docking of CDK5/p25 crystal bound ligands .....          | S2 |
| Table T2: Ensemble docking of CDK2 crystal bound ligands .....              | S3 |
| Table T3: Hypotheses generated from E-pharmacophores .....                  | S4 |
| Figure F1: IC50 curves (A) and Lineweaver-Burk Plot (B) of <b>25o</b> ..... | S5 |
| Figure F2: IC50 curves (A) and Lineweaver-Burk Plot (B) of <b>25s</b> ..... | S6 |
| Figure F3: IC50 curves (A) and Lineweaver-Burk Plot (B) of <b>25w</b> ..... | S7 |
| NMR, HRMS Spectra and HPLC scan.....                                        | S8 |

**Table T1.** Ensemble docking of CDK5/p25 crystal bound ligands

| Protein PDB id | Crystal bound Ligands | GlideScores |
|----------------|-----------------------|-------------|
| 300G           | Ligand_300G           | -10.570     |
|                | Ligand_1UNH           | -8.542      |
|                | Ligand_1UNG           | -8.401      |
|                | Ligand_1UNL           | -5.530      |
| 1UNL           | Ligand_1UNL           | -9.968      |
|                | Ligand_1UNG           | -8.498      |
|                | Ligand_300G           | -8.325      |
|                | Ligand_1UNH           | -7.678      |
| 1UNG           | Ligand_1UNG           | -9.208      |
|                | Ligand_1UNH           | -6.737      |
|                | Ligand_1UNL           | -4.612      |
|                | Ligand_300G           | -3.912      |
| 1UNH           | Ligand_1UNH           | -8.263      |
|                | Ligand_300G           | -6.594      |
|                | Ligand_1UNL           | -5.999      |
|                | Ligand_1UNG           | -5.883      |

**Table T2.** Ensemble docking of CDK2 crystal bound ligands

| Protein Structures | Crystal bound Ligands | GlideScores |
|--------------------|-----------------------|-------------|
| 1AQ1               | Ligand_1AQ1           | -13.324     |
|                    | Ligand_2VTP           | -10.099     |
|                    | Ligand_1OIT           | -9.906      |
|                    | Ligand_1R78           | -8.256      |
|                    | Ligand_2A4L           | -8.117      |
|                    | Ligand_2W17           | -4.511      |
| 2W17               | Ligand_2W17           | -11.763     |
|                    | Ligand_1OIT           | -11.185     |
|                    | Ligand_2A4L           | -10.681     |
|                    | Ligand_2VTP           | -8.965      |
|                    | Ligand_1R78           | -6.146      |
|                    | Ligand_1AQ1           | -1.955      |
| 1OIT               | Ligand_1OIT           | -11.324     |
|                    | Ligand_2W17           | -10.102     |
|                    | Ligand_1R78           | -9.914      |
|                    | Ligand_2VTP           | -8.477      |
|                    | Ligand_2A4L           | -6.960      |
|                    | Ligand_1AQ1           | *           |
| 2A4L               | Ligand_2W17           | -10.450     |
|                    | Ligand_1R78           | -9.762      |
|                    | Ligand_2A4L           | -9.592      |
|                    | Ligand_1OIT           | -7.258      |
|                    | Ligand_2VTP           | -5.645      |
|                    | Ligand_1AQ1           | -3.240      |
| 2VTP               | Ligand_1OIT           | -11.279     |
|                    | Ligand_2VTP           | -10.470     |
|                    | Ligand_2W17           | -9.874      |
|                    | Ligand_1R78           | -9.102      |
|                    | Ligand_2A4L           | -7.590      |
|                    | Ligand_1AQ1           | -7.434      |
| 1R78               | Ligand_2W17           | -10.488     |
|                    | Ligand_2A4L           | -9.256      |
|                    | Ligand_1OIT           | -8.886      |
|                    | Ligand_1R78           | -8.724      |
|                    | Ligand_2VTP           | -8.418      |
|                    | Ligand_1AQ1           | -5.067      |

\* Ligand did not dock in the selected grid

**Table T3.** Hypotheses generated from E-pharmacophores

| E-pharmacophore | Hypotheses  | Pharmacophoric features |
|-----------------|-------------|-------------------------|
| 1UNG            | 1UNG_hypo 1 | A1A2D5H6R8R9            |
|                 | 1UNG_hypo 2 | A1A2D5R8R9              |
|                 | 1UNG_hypo 3 | A2D5R8R9                |
| 1UNH            | 1UNH_hypo 1 | A3D4H8R10               |
|                 | 1UNH_hypo 2 | A1A3D4H8R10             |
| 1UNL            | 1UNL_hypo 1 | A2D5D6R11R12            |
|                 | 1UNL_hypo 2 | A2D6H8R11R12            |
|                 | 1UNL_hypo 3 | A2A4H8D6R11R12          |
|                 | 1UNL_hypo 4 | A2D5D6H8R11R12          |
|                 | 1UNL_hypo 5 | A2A4D5D6H8R11R12        |
| 300G            | 300G_hypo 1 | A1A2D3D4R7R8R9          |
|                 | 300G_hypo 2 | A1A2D3D4R7R8            |

**Figure F1.** IC50 curves (A) and Lineweaver-Burk Plot (B) of **25o**

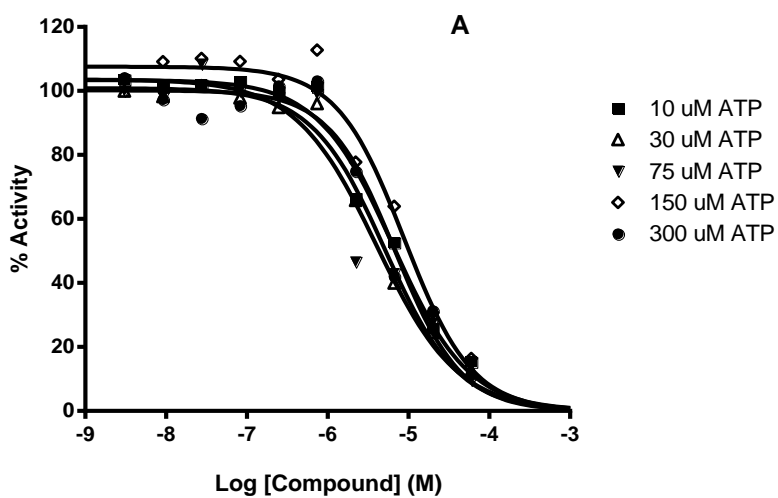

|           | 10 uM ATP  | 30 uM ATP  | 75 uM ATP  | 150 uM ATP | 300 uM ATP |
|-----------|------------|------------|------------|------------|------------|
| HillSlope | -0.9278    | -0.9563    | -0.8668    | -1.031     | -1.059     |
| EC50      | 6.433e-006 | 5.114e-006 | 4.003e-006 | 8.864e-006 | 6.805e-006 |

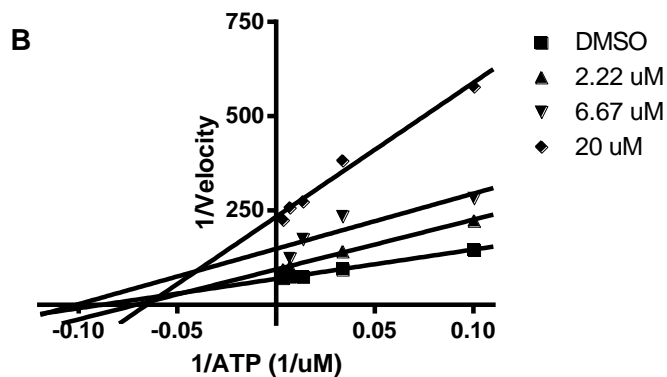

|                        | DMSO          | 2.22 uM       | 6.67 uM       | 20 uM         |
|------------------------|---------------|---------------|---------------|---------------|
| Y-intercept when X=0.0 | 68.73 ± 1.464 | 93.73 ± 3.056 | 148.4 ± 26.90 | 233.1 ± 13.20 |
| X-intercept when Y=0.0 | -0.08840      | -0.07094      | -0.1013       | -0.06550      |
| 1/slope                | 0.001286      | 0.0007569     | 0.0006826     | 0.0002810     |

**Figure F2.** IC50 curves (A) and Lineweaver-Burk Plot (B) of **25s**

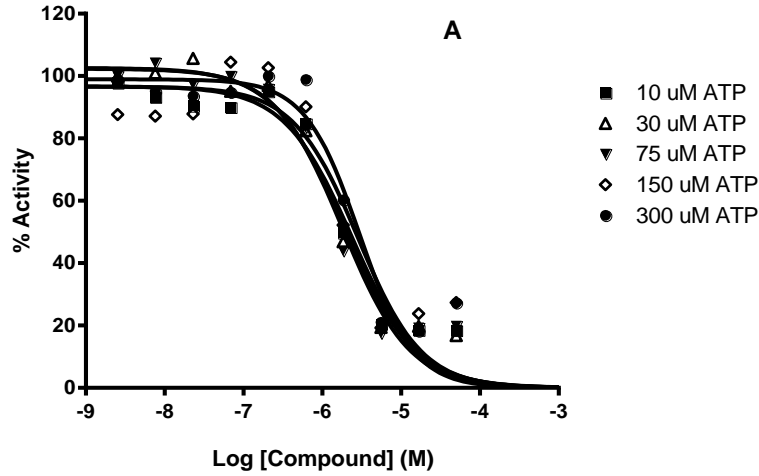

|           | 10 uM ATP  | 30 uM ATP  | 75 uM ATP  | 150 uM ATP | 300 uM ATP |
|-----------|------------|------------|------------|------------|------------|
| HillSlope | -1.017     | -0.9749    | -1.021     | -1.067     | -1.264     |
| EC50      | 2.365e-006 | 1.907e-006 | 1.807e-006 | 2.814e-006 | 2.944e-006 |

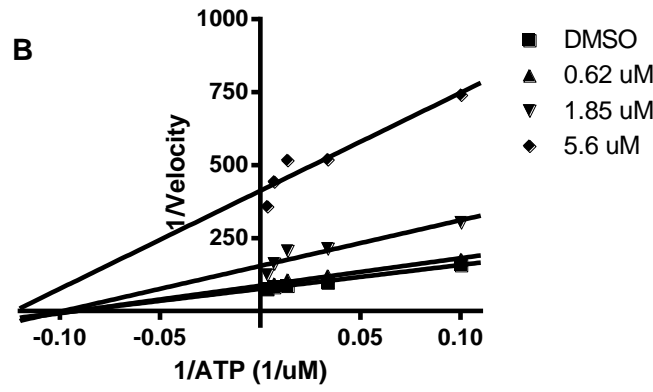

|                        | DMSO          | 0.62 uM       | 1.85 uM       | 5.6 uM        |
|------------------------|---------------|---------------|---------------|---------------|
| Y-intercept when X=0.0 | 75.74 ± 1.735 | 86.77 ± 5.961 | 154.3 ± 16.54 | 412.0 ± 30.56 |
| X-intercept when Y=0.0 | -0.09230      | -0.09192      | -0.09850      | -0.1227       |
| 1/slope                | 0.001219      | 0.001059      | 0.0006381     | 0.0002978     |

**Figure F3.** IC50 curves (A) and Lineweaver-Burk Plot (B) of **25w**

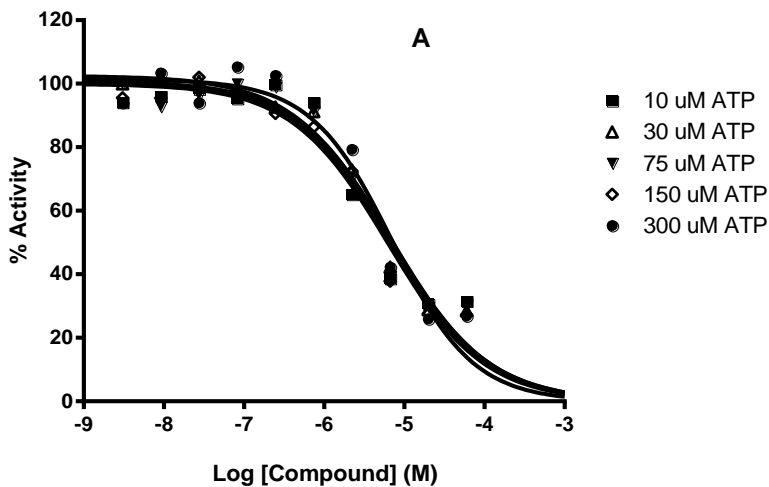

|           | 10 uM ATP  | 30 uM ATP  | 75 uM ATP  | 150 uM ATP | 300 uM ATP |
|-----------|------------|------------|------------|------------|------------|
| HillSlope | -0.7101    | -0.7108    | -0.7318    | -0.7229    | -0.8565    |
| EC50      | 6.863e-006 | 6.686e-006 | 6.997e-006 | 6.191e-006 | 7.009e-006 |

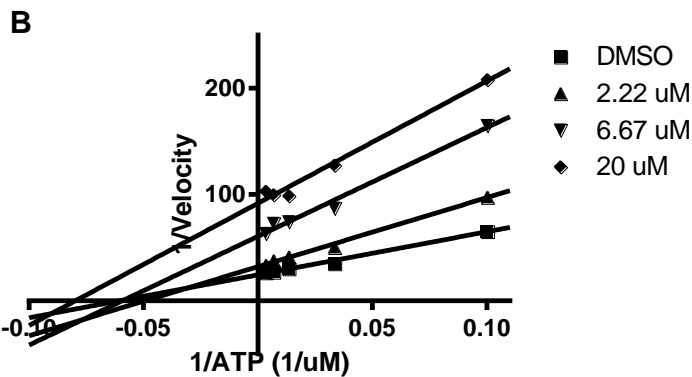

|                        | DMSO           | 2.22 uM       | 6.67 uM       | 20 uM         |
|------------------------|----------------|---------------|---------------|---------------|
| Y-intercept when X=0.0 | 24.52 ± 0.9928 | 32.11 ± 1.289 | 60.66 ± 3.273 | 91.78 ± 3.963 |
| X-intercept when Y=0.0 | -0.06060       | -0.04940      | -0.05928      | -0.07981      |
| 1/slope                | 0.002471       | 0.001539      | 0.0009772     | 0.0008696     |

**$^1\text{H}$  &  $^{13}\text{C}$  NMR, HRMS and HPLC data**



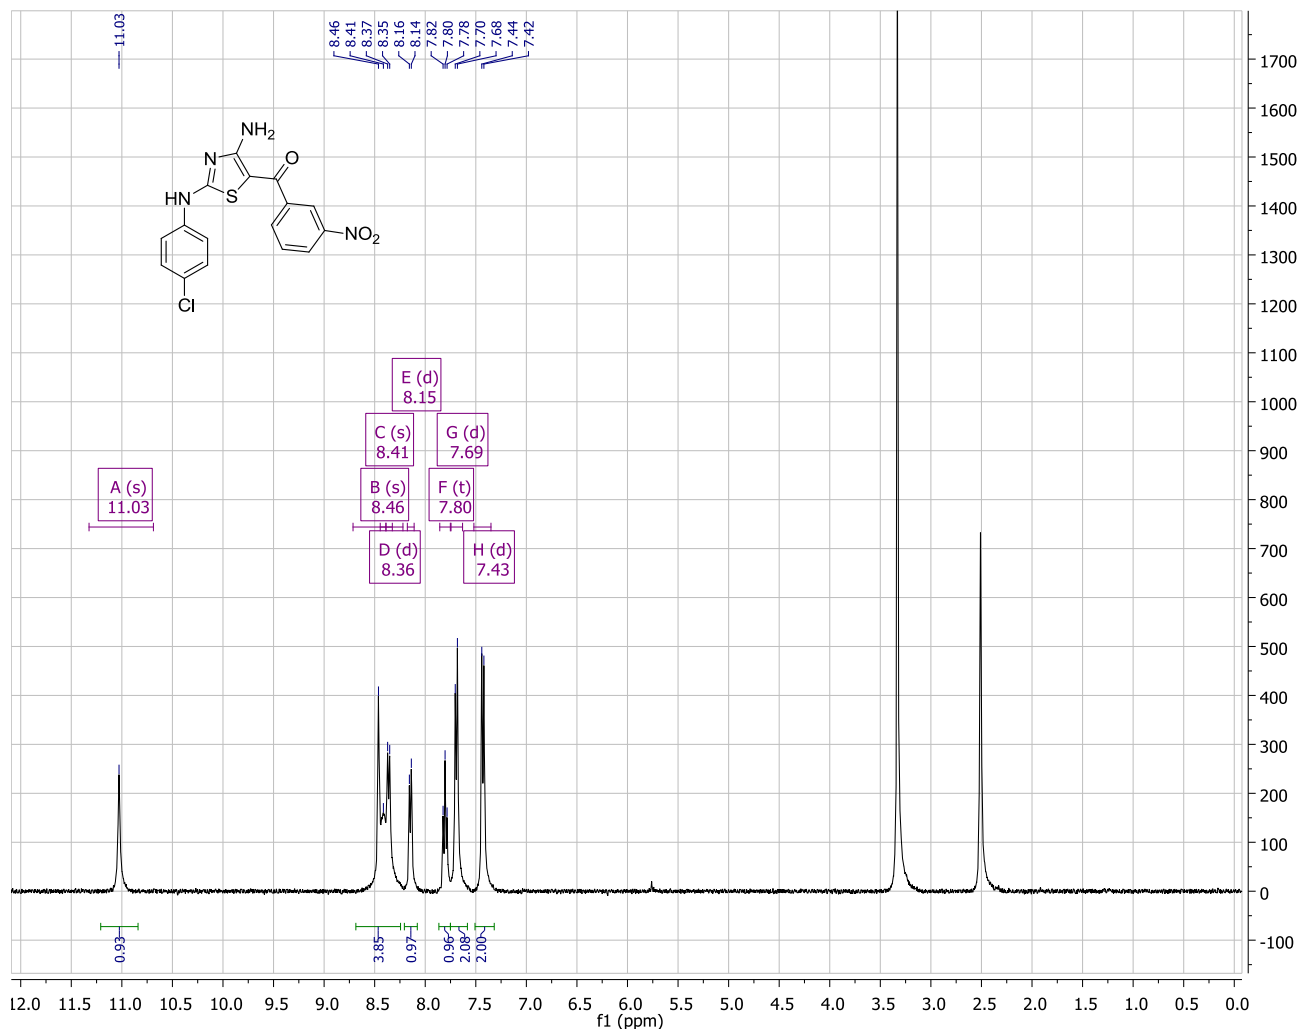

<sup>1</sup>H NMR spectrum of 4

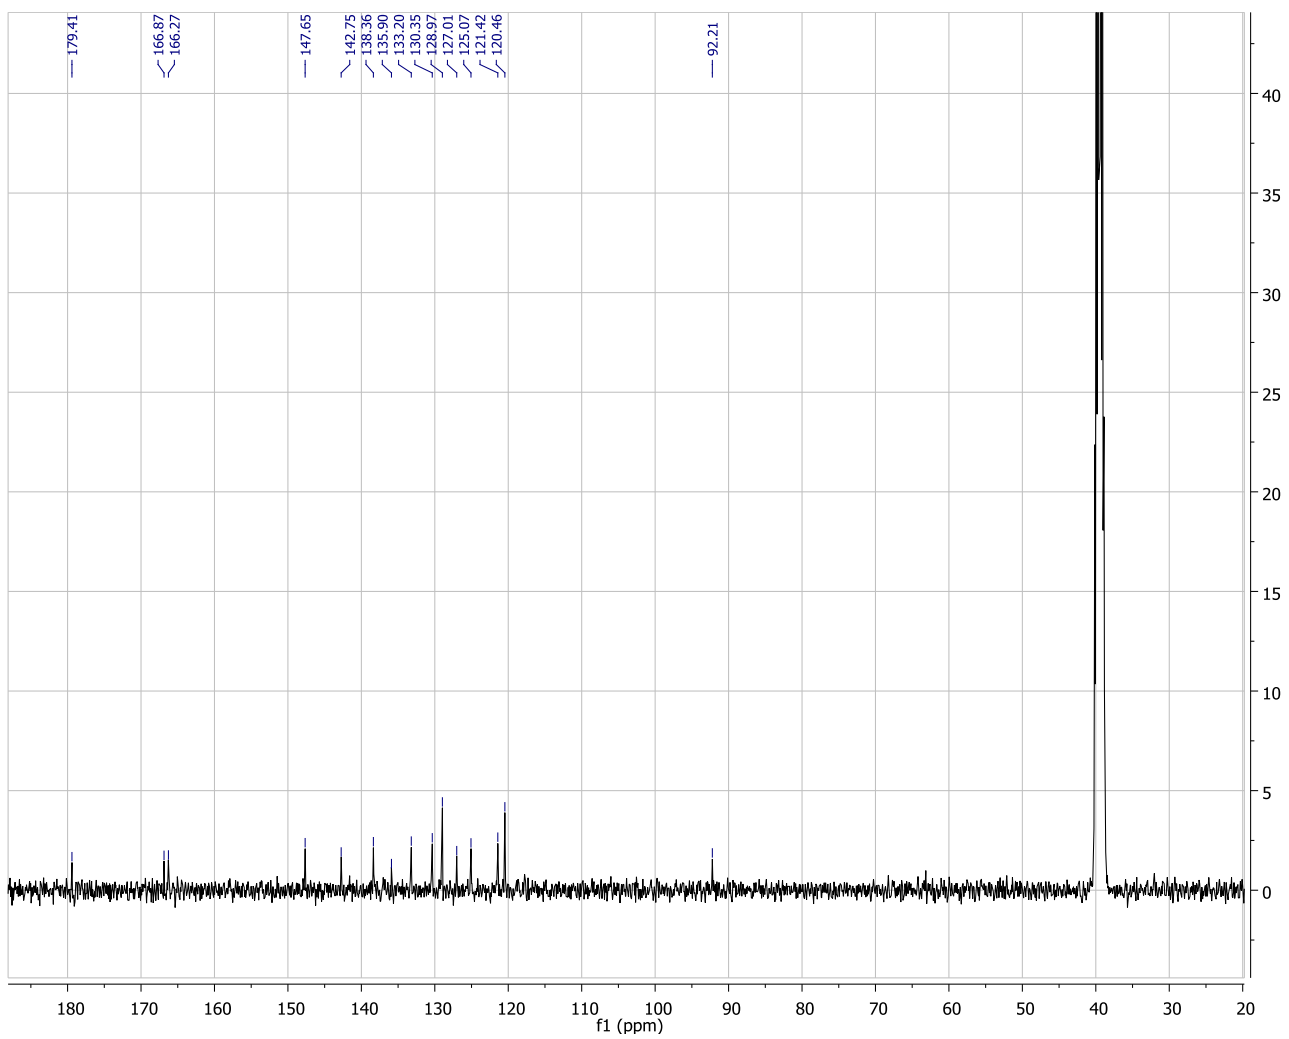

$^{13}\text{C}$  NMR spectrum of 4

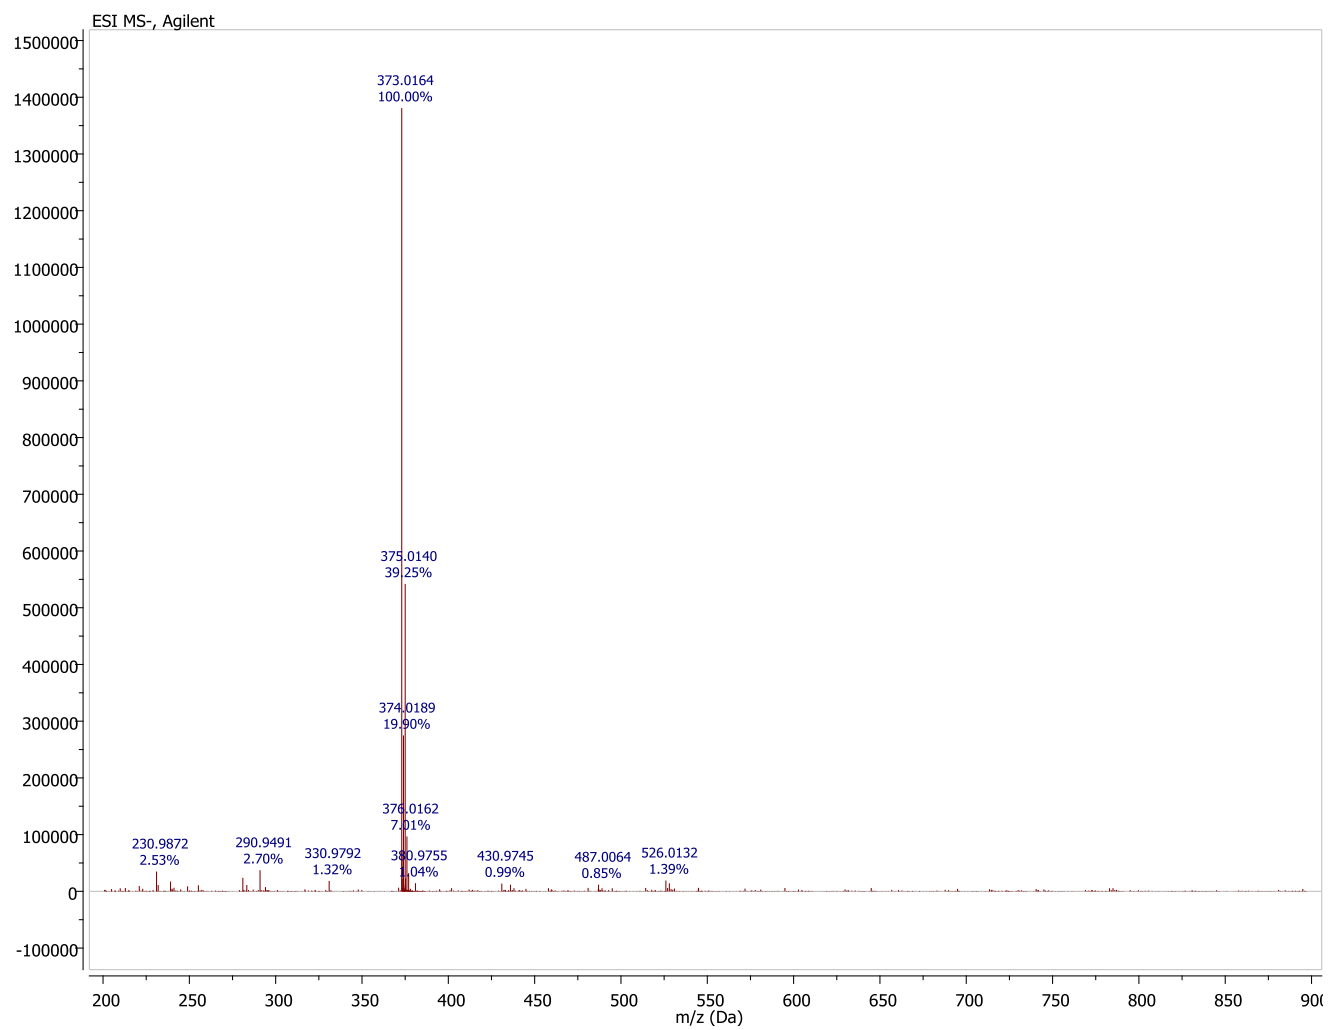

HRMS (TOF) of 4

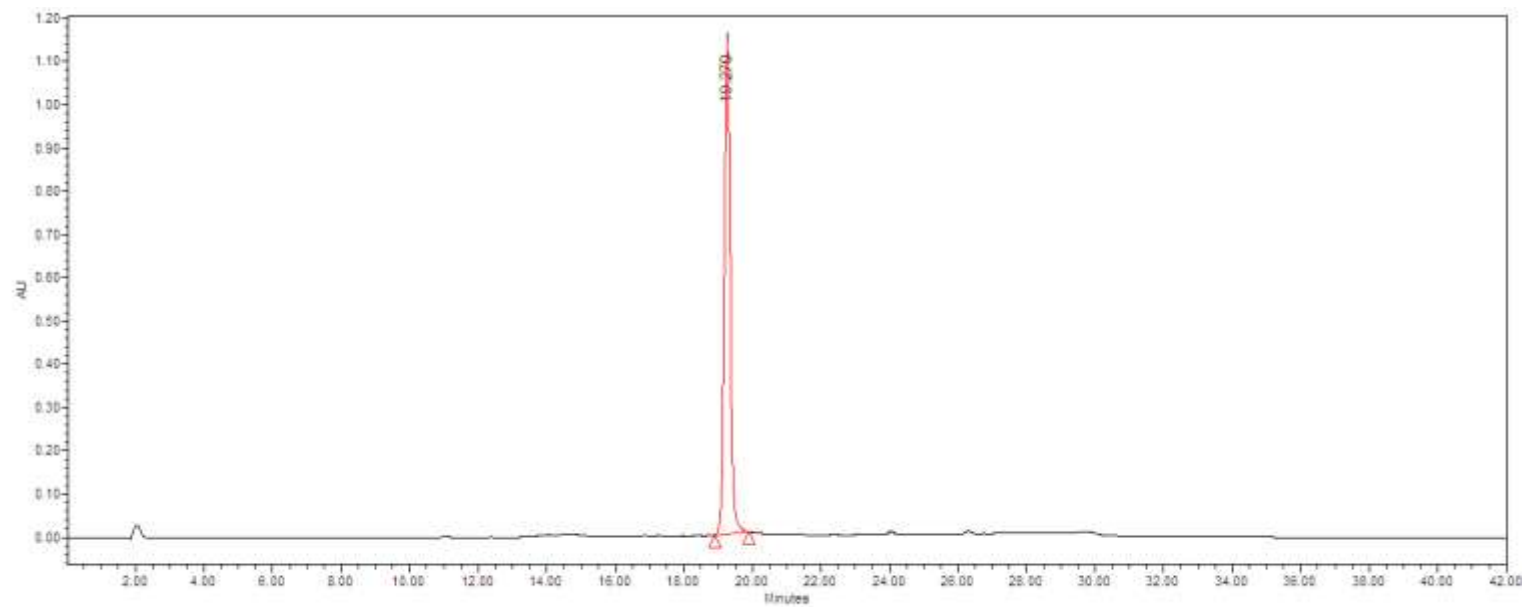

| Retention time (min) | % Area |
|----------------------|--------|
| 19.270               | 100    |

HPLC of **4**

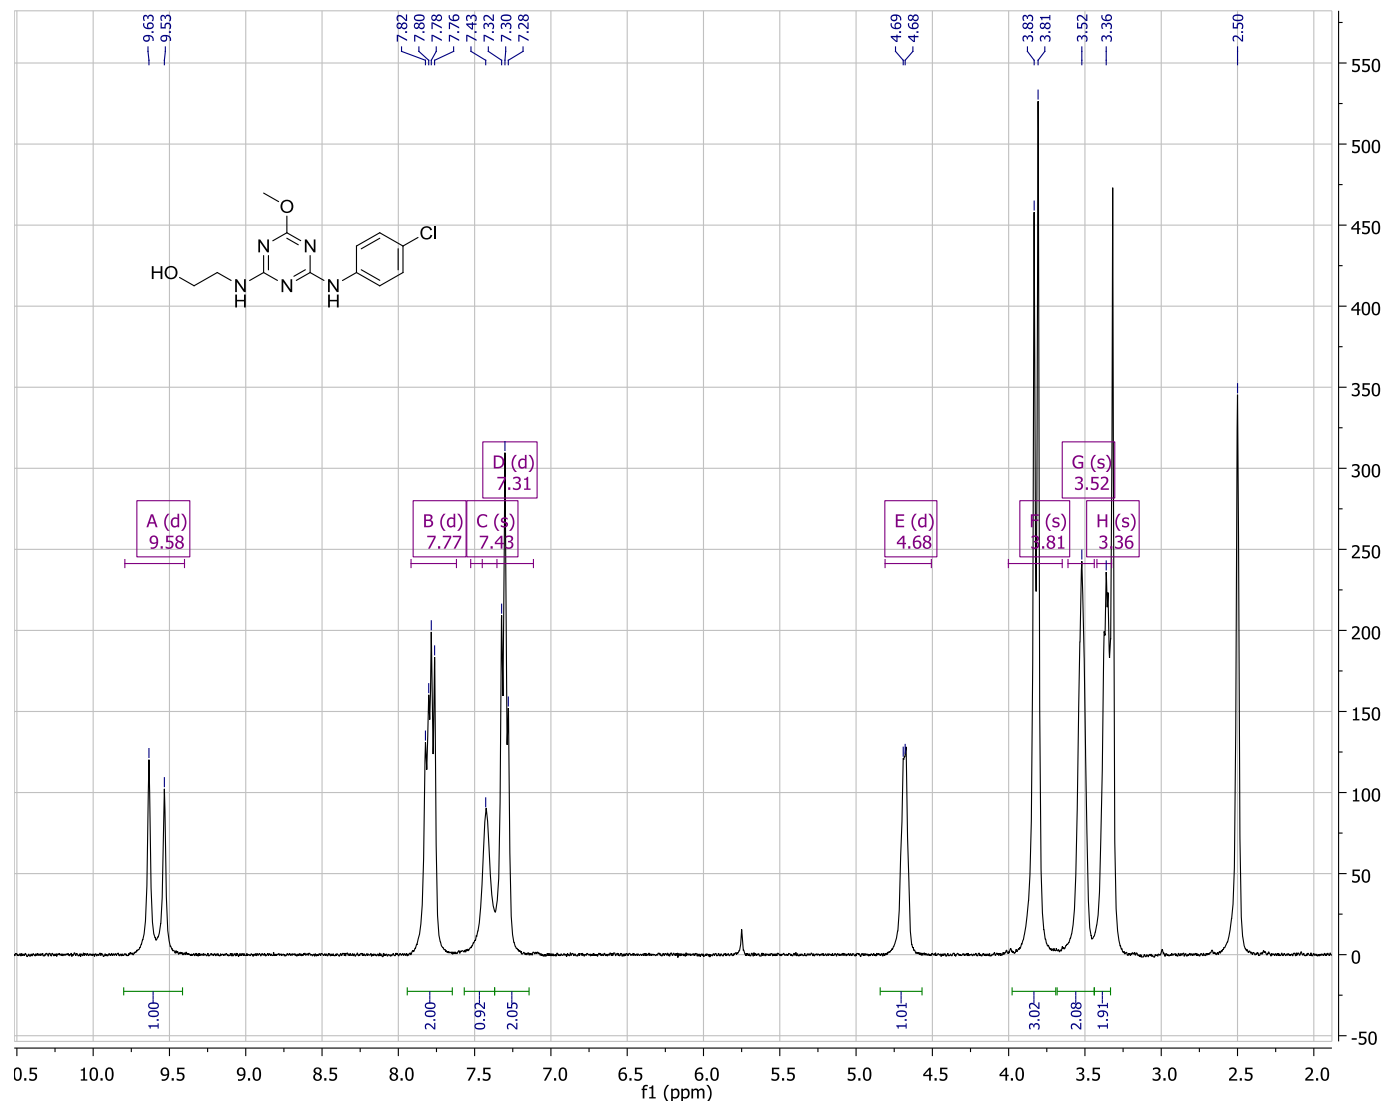

<sup>1</sup>H NMR spectrum of 5

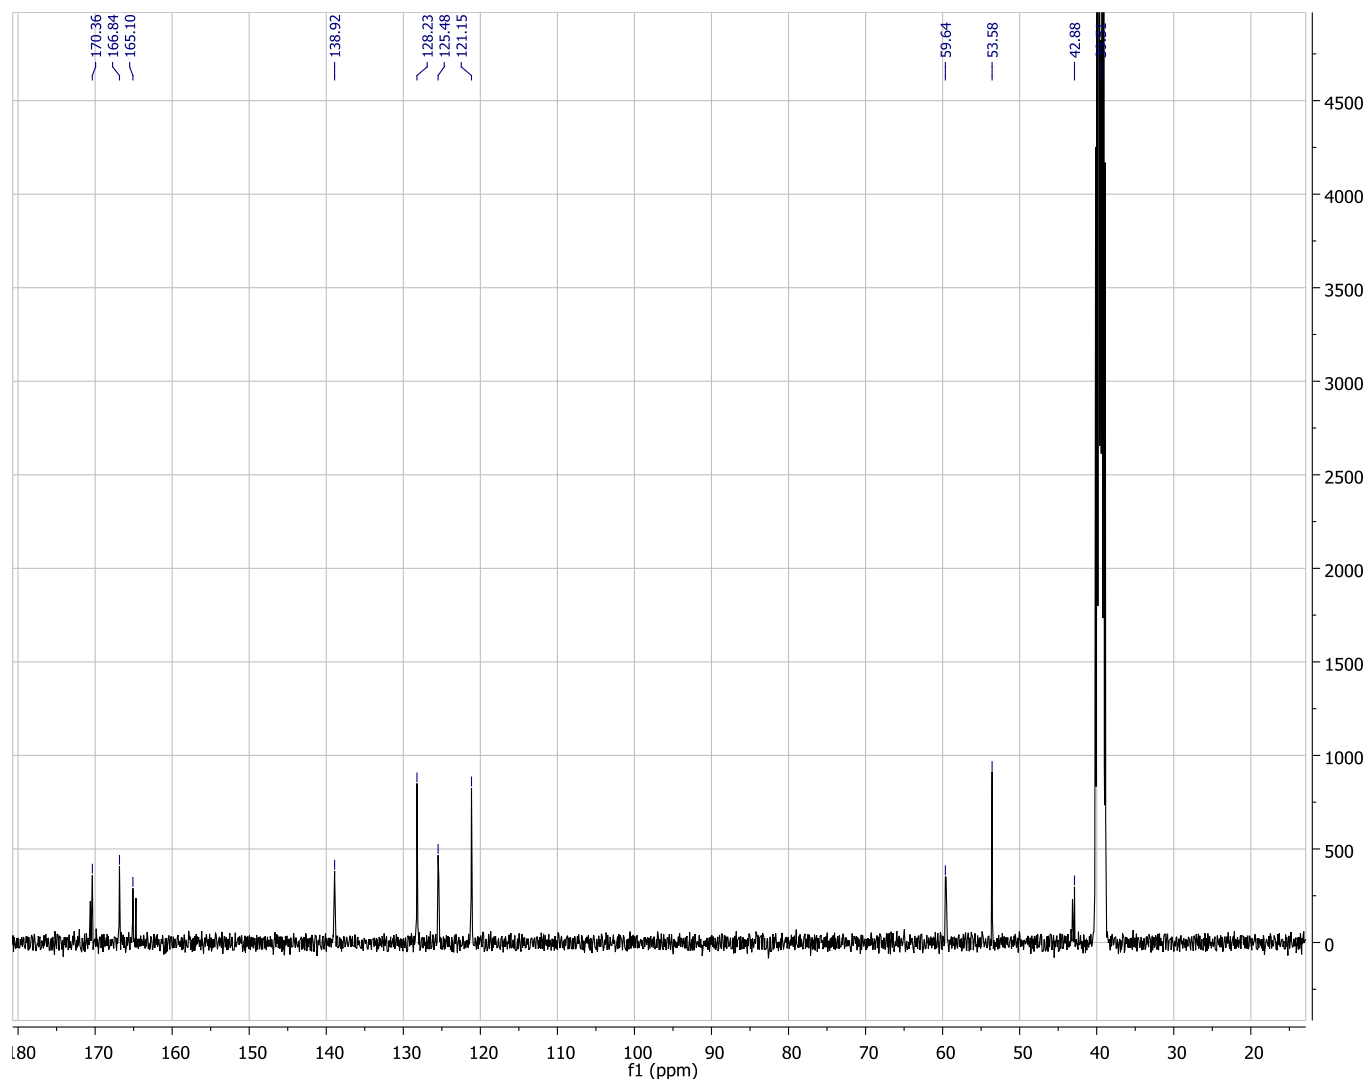

$^{13}\text{C}$  NMR spectrum of 5

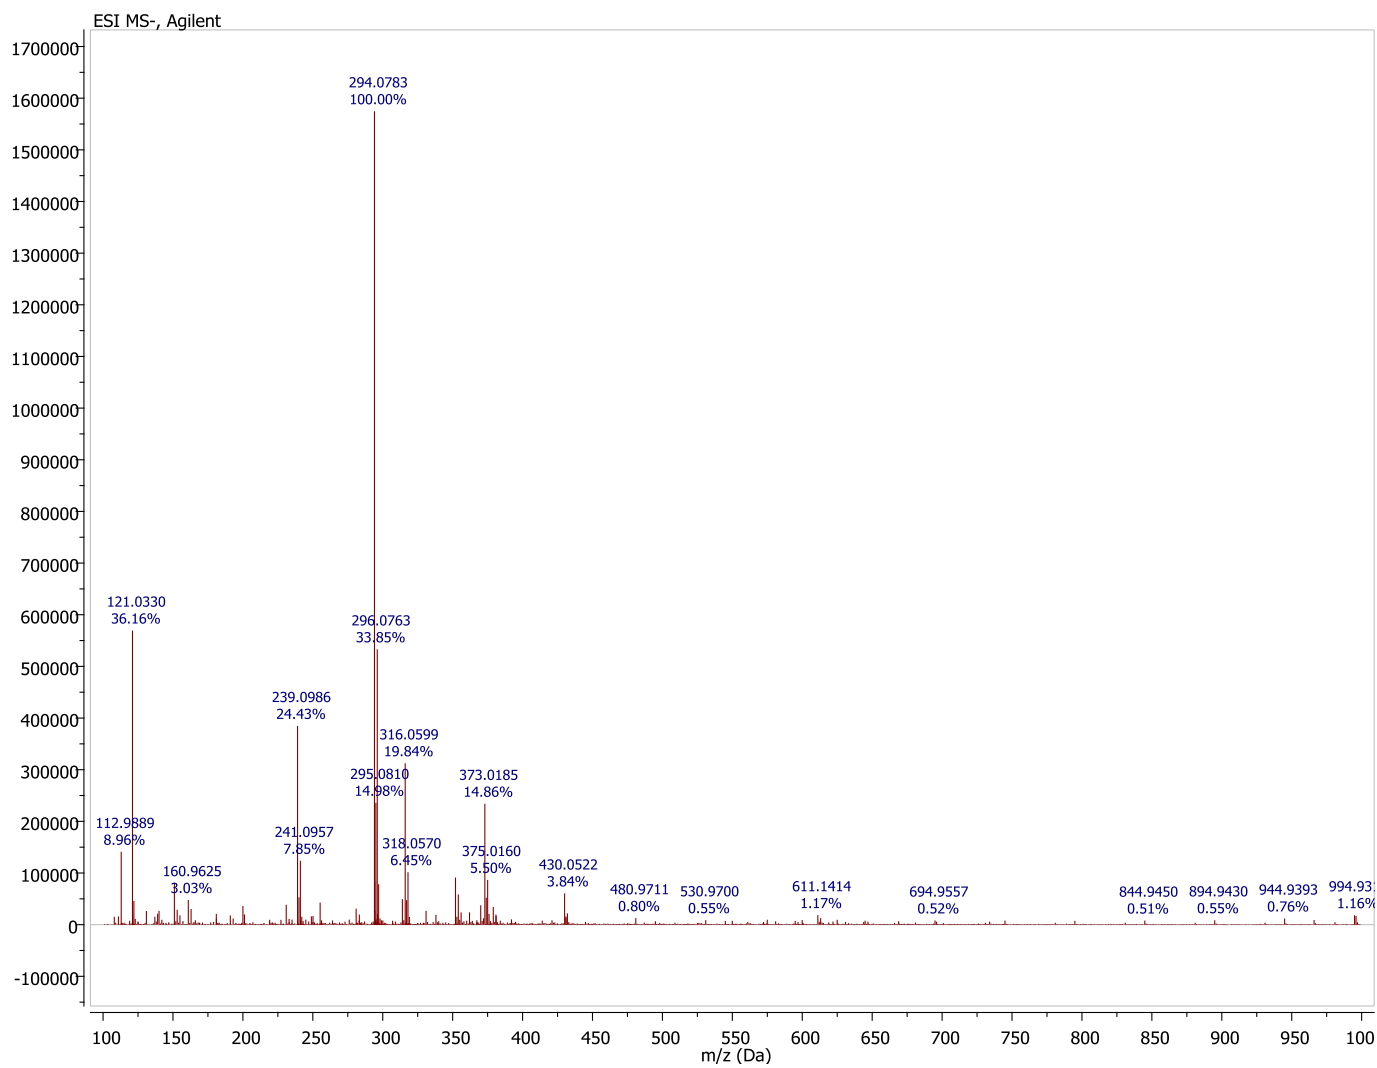

HRMS (TOF) of 5

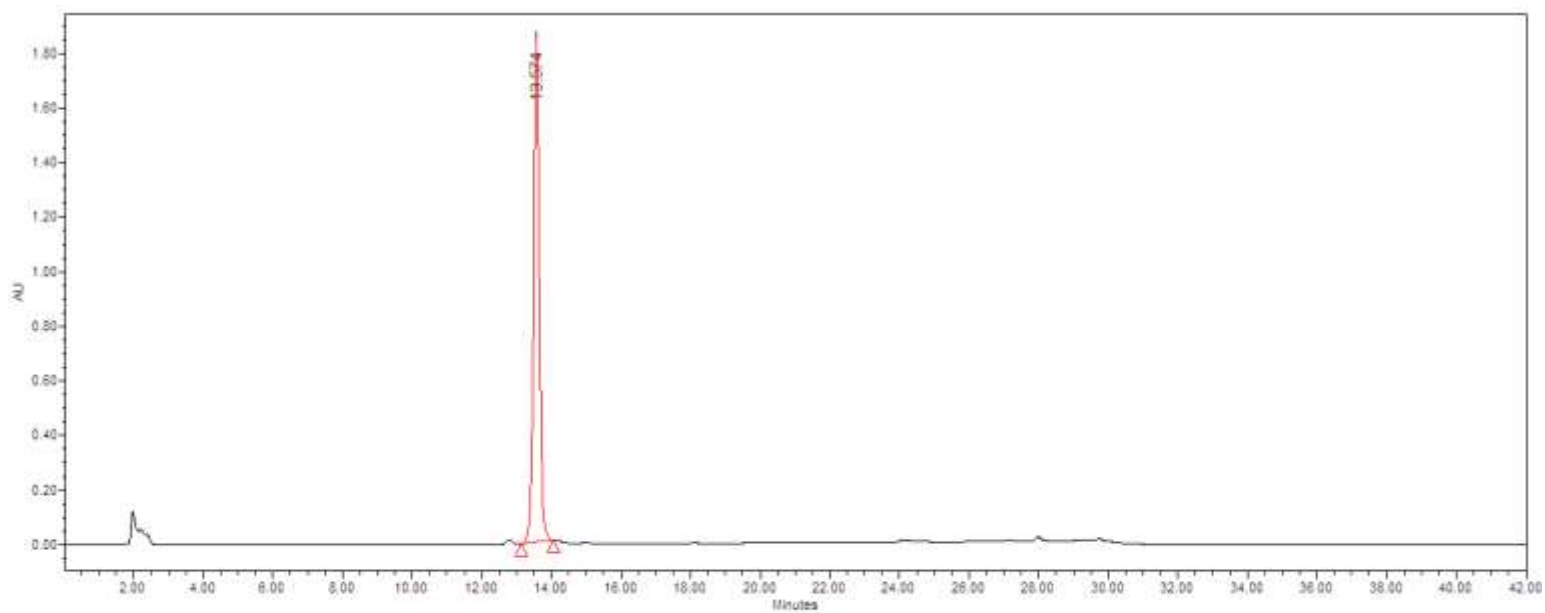

| Retention time (min) | % Area |
|----------------------|--------|
| 13.574               | 99.9   |

HPLC of 5



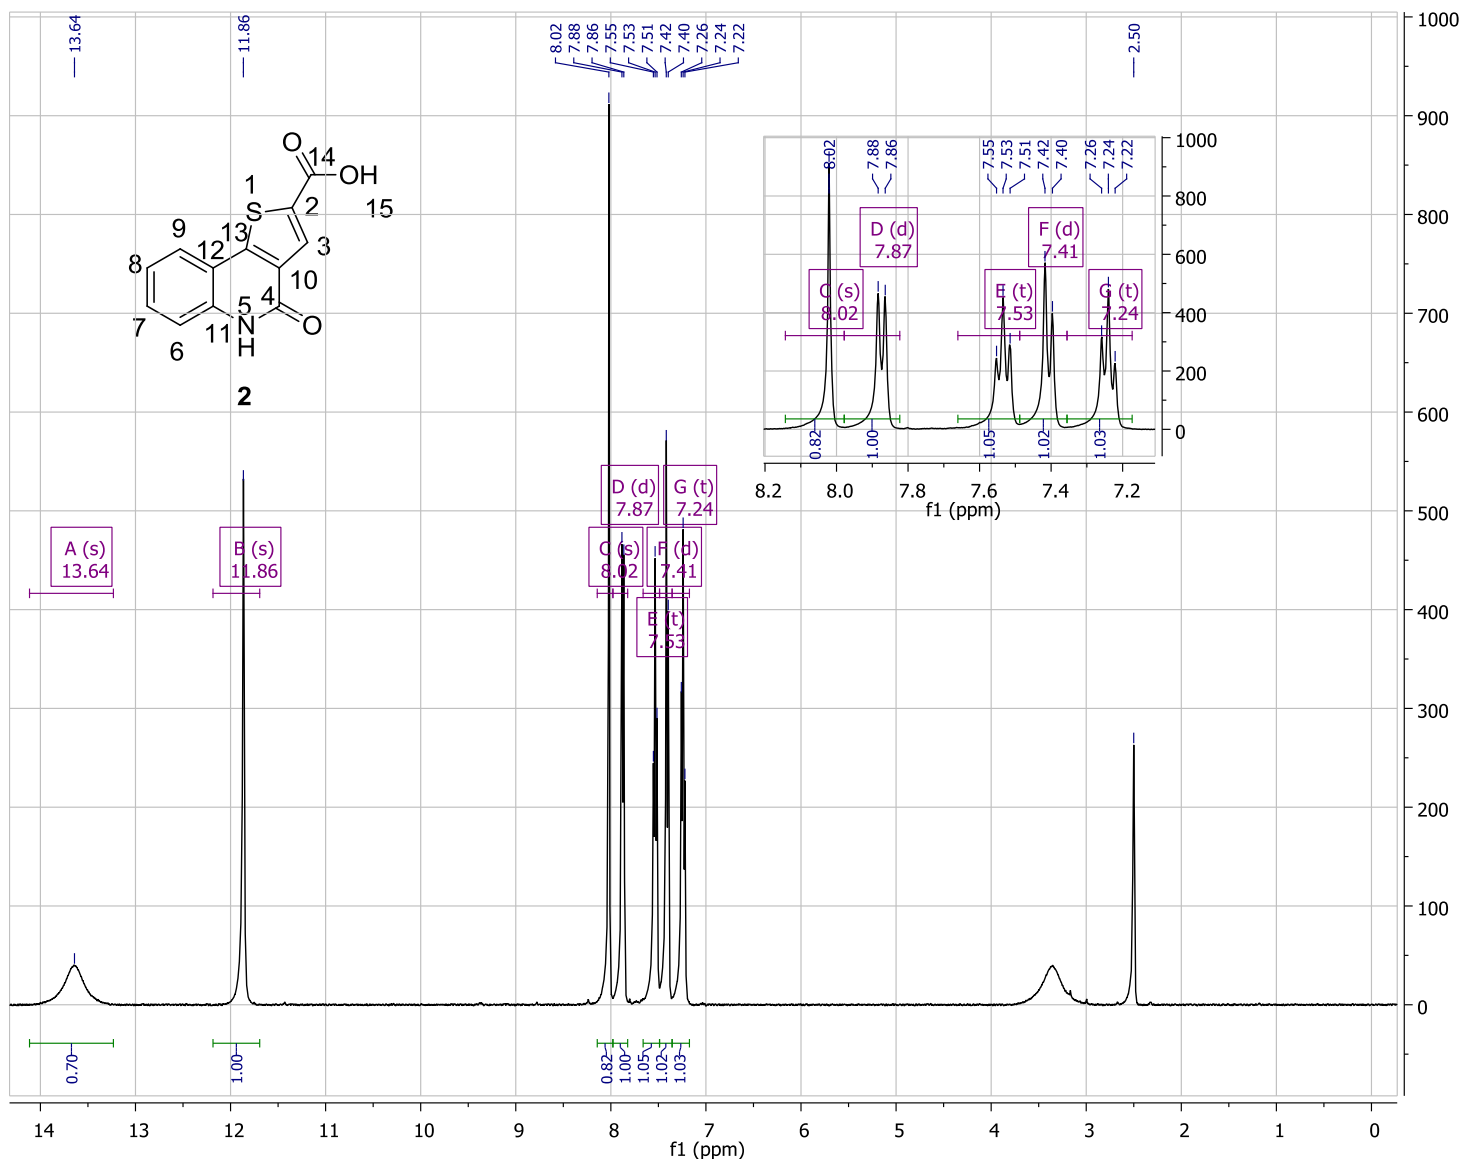

<sup>1</sup>H NMR spectrum of 14

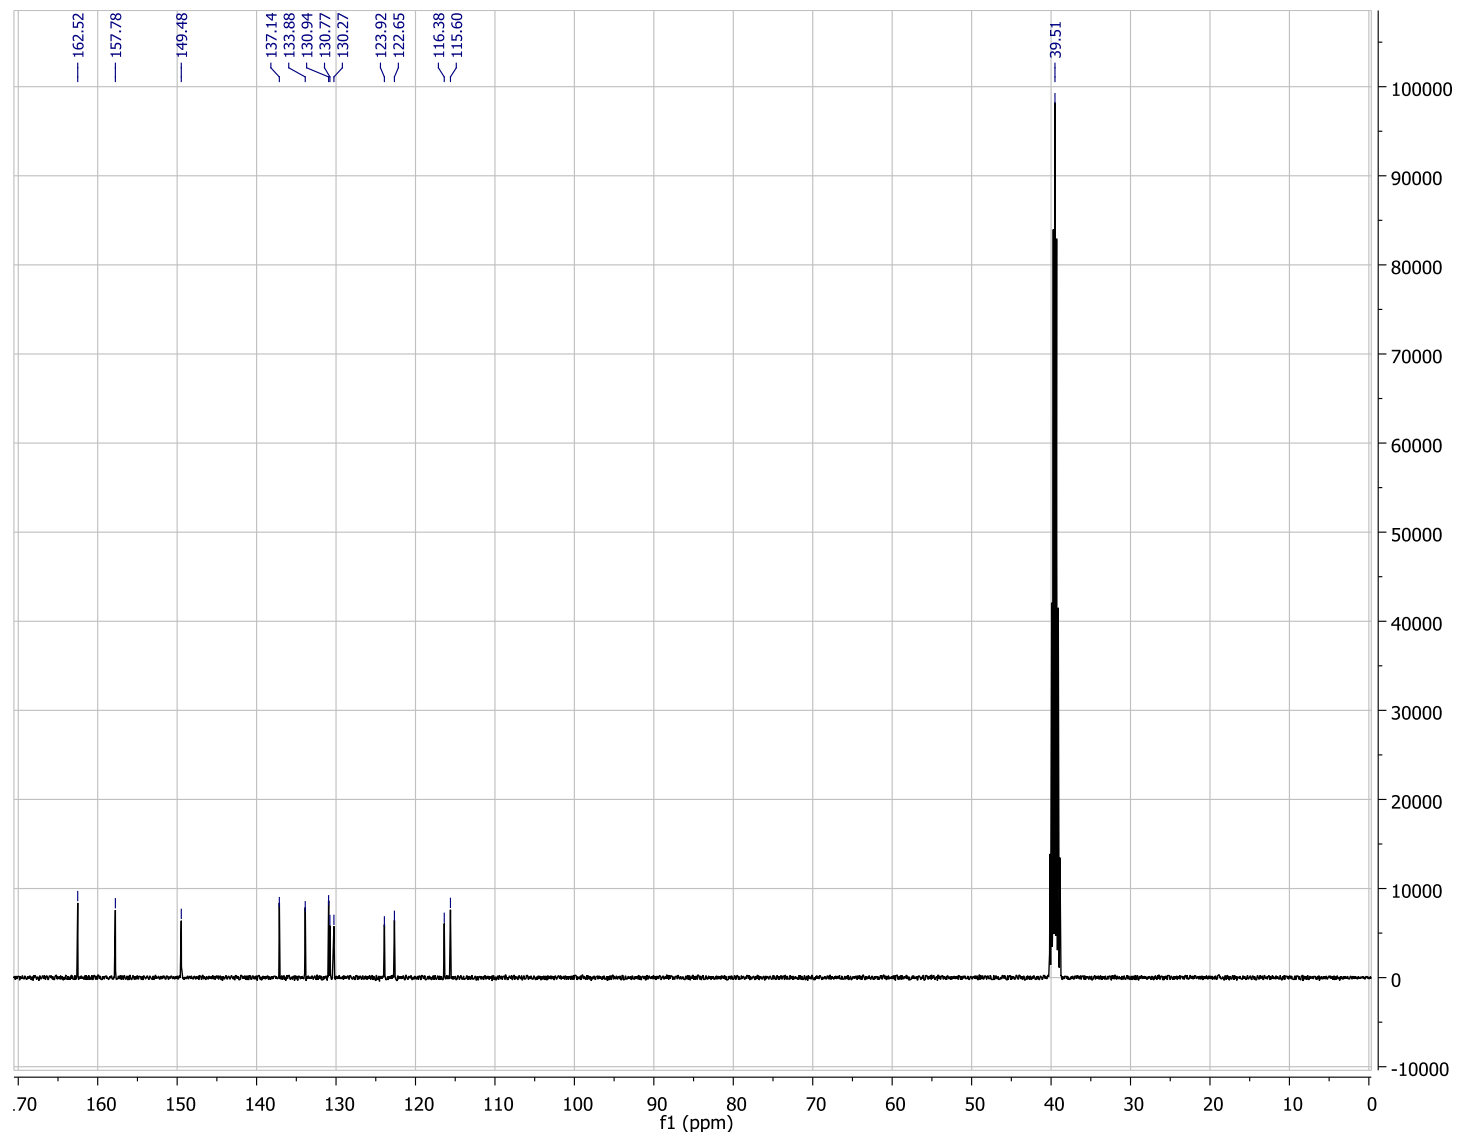

$^{13}\text{C}$  NMR spectrum of 14

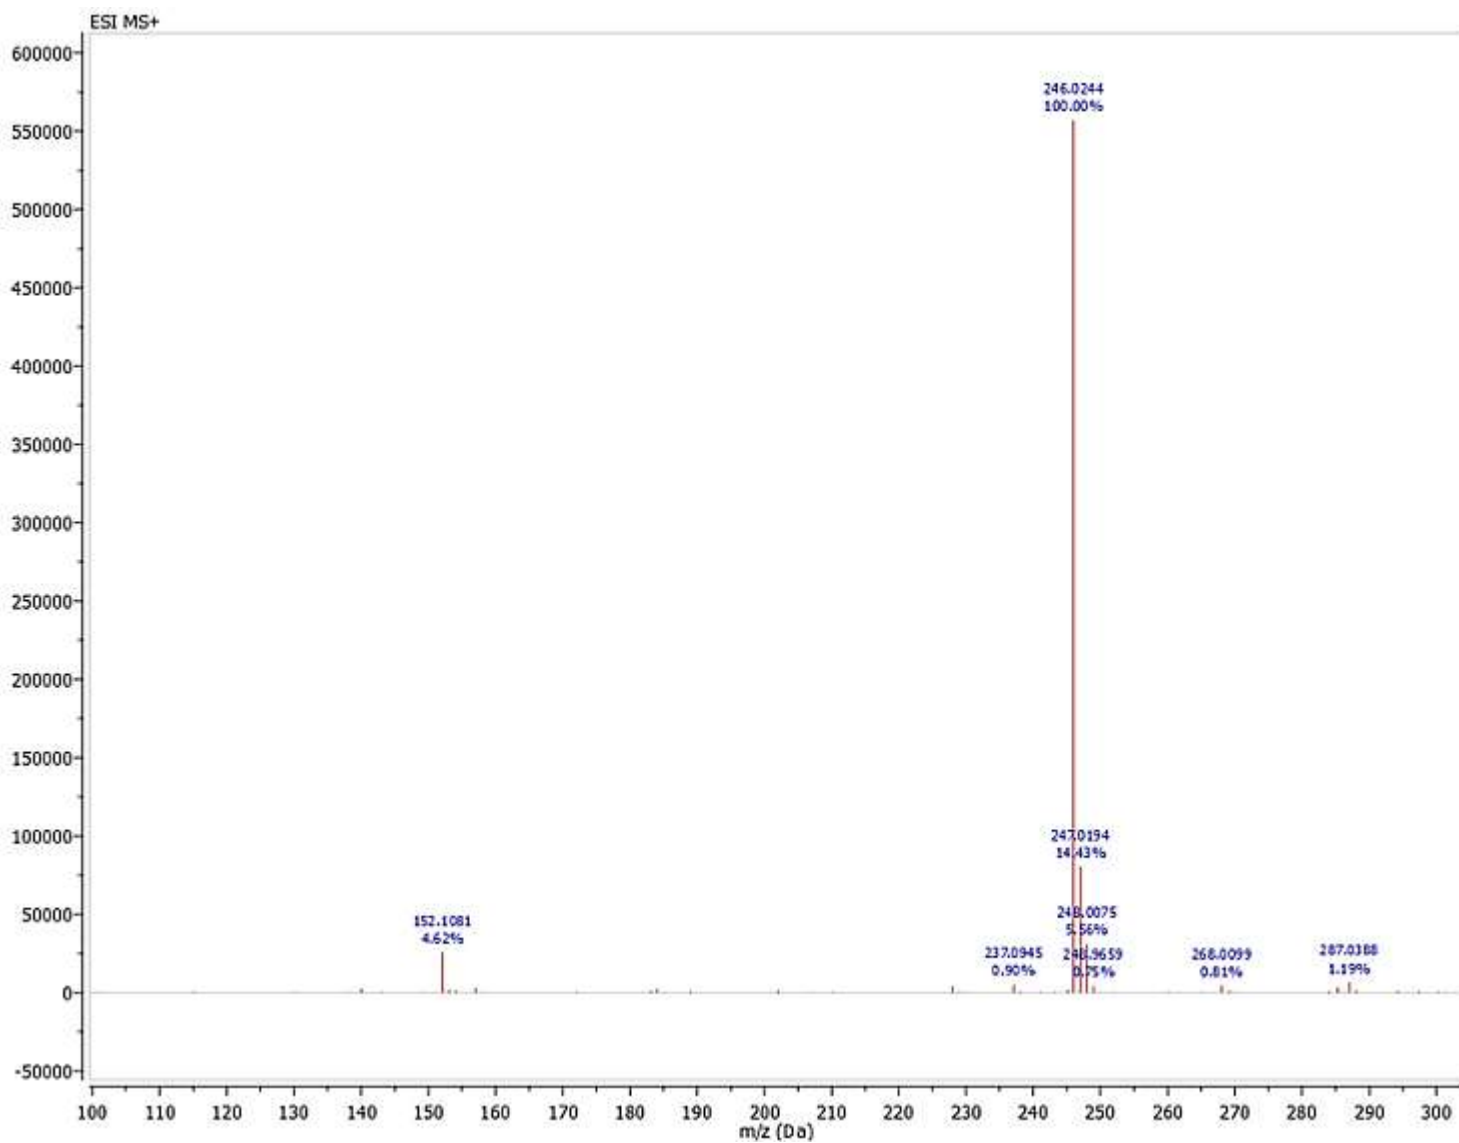

HRMS (TOF) of 14

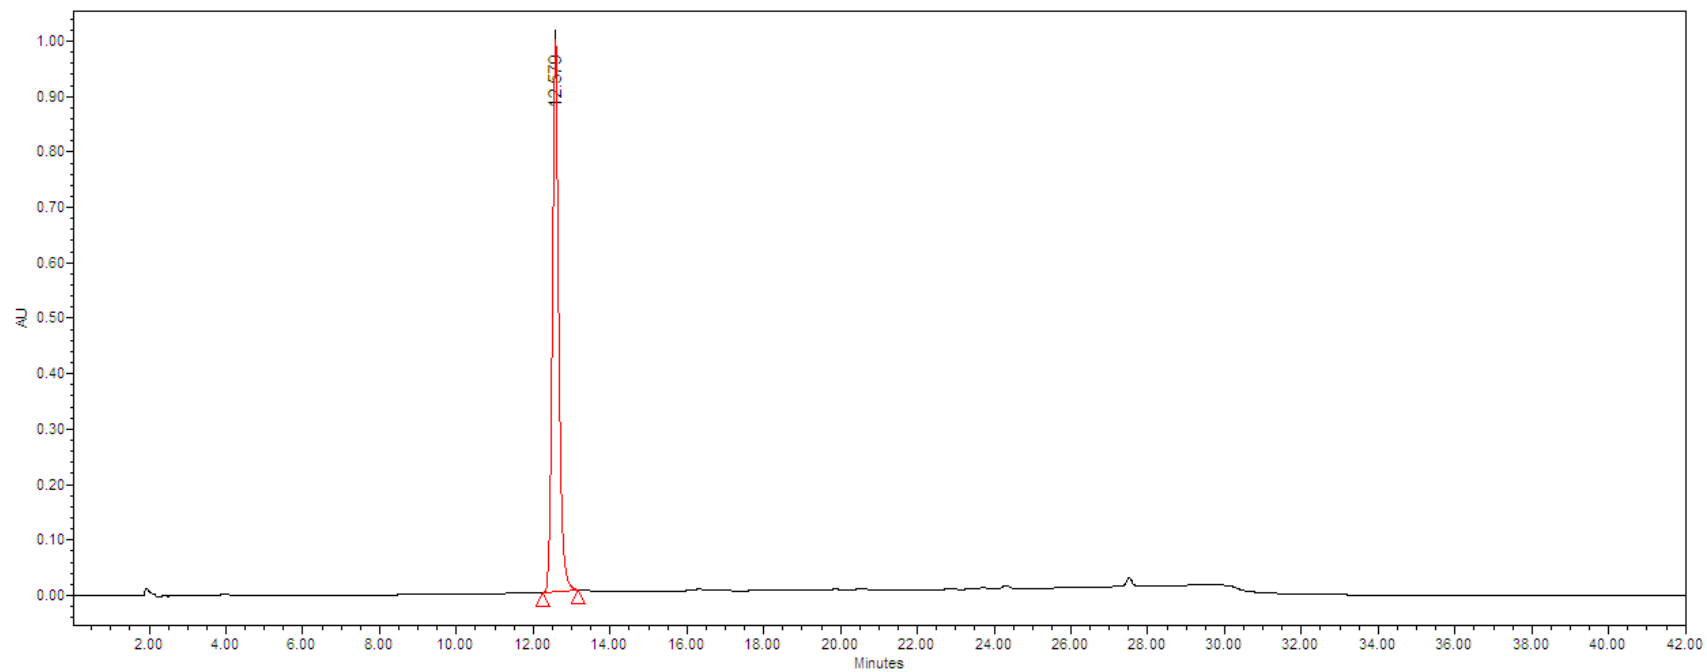

HPLC scan of 14

| Retention time (min) | % Area |
|----------------------|--------|
| 12.579               | 100    |

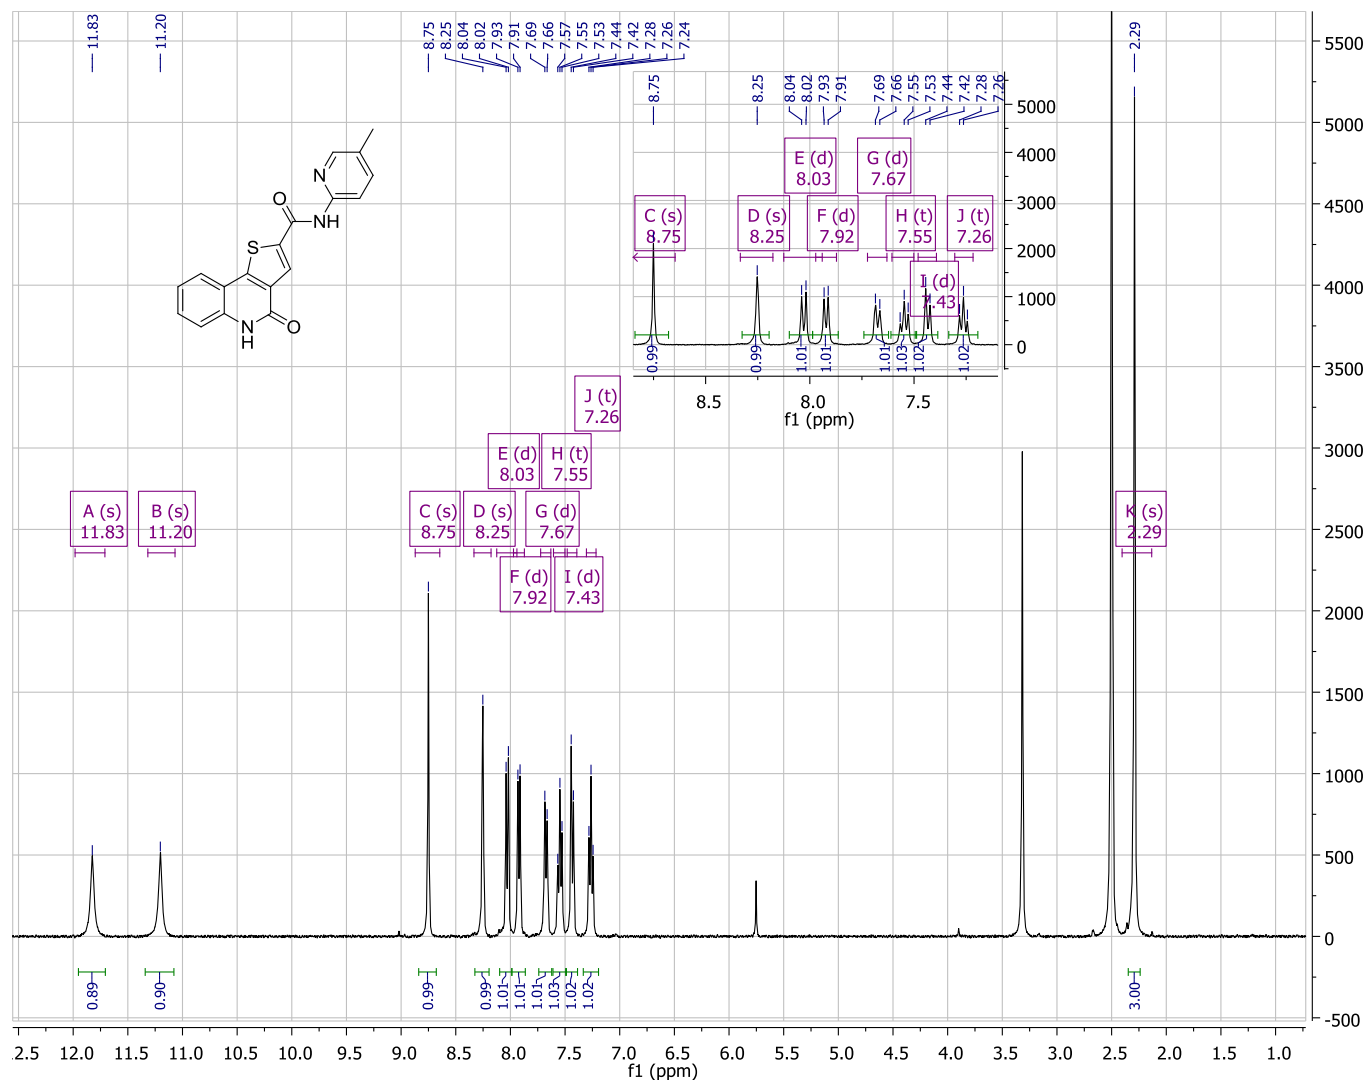

**<sup>1</sup>H NMR spectrum of 10**

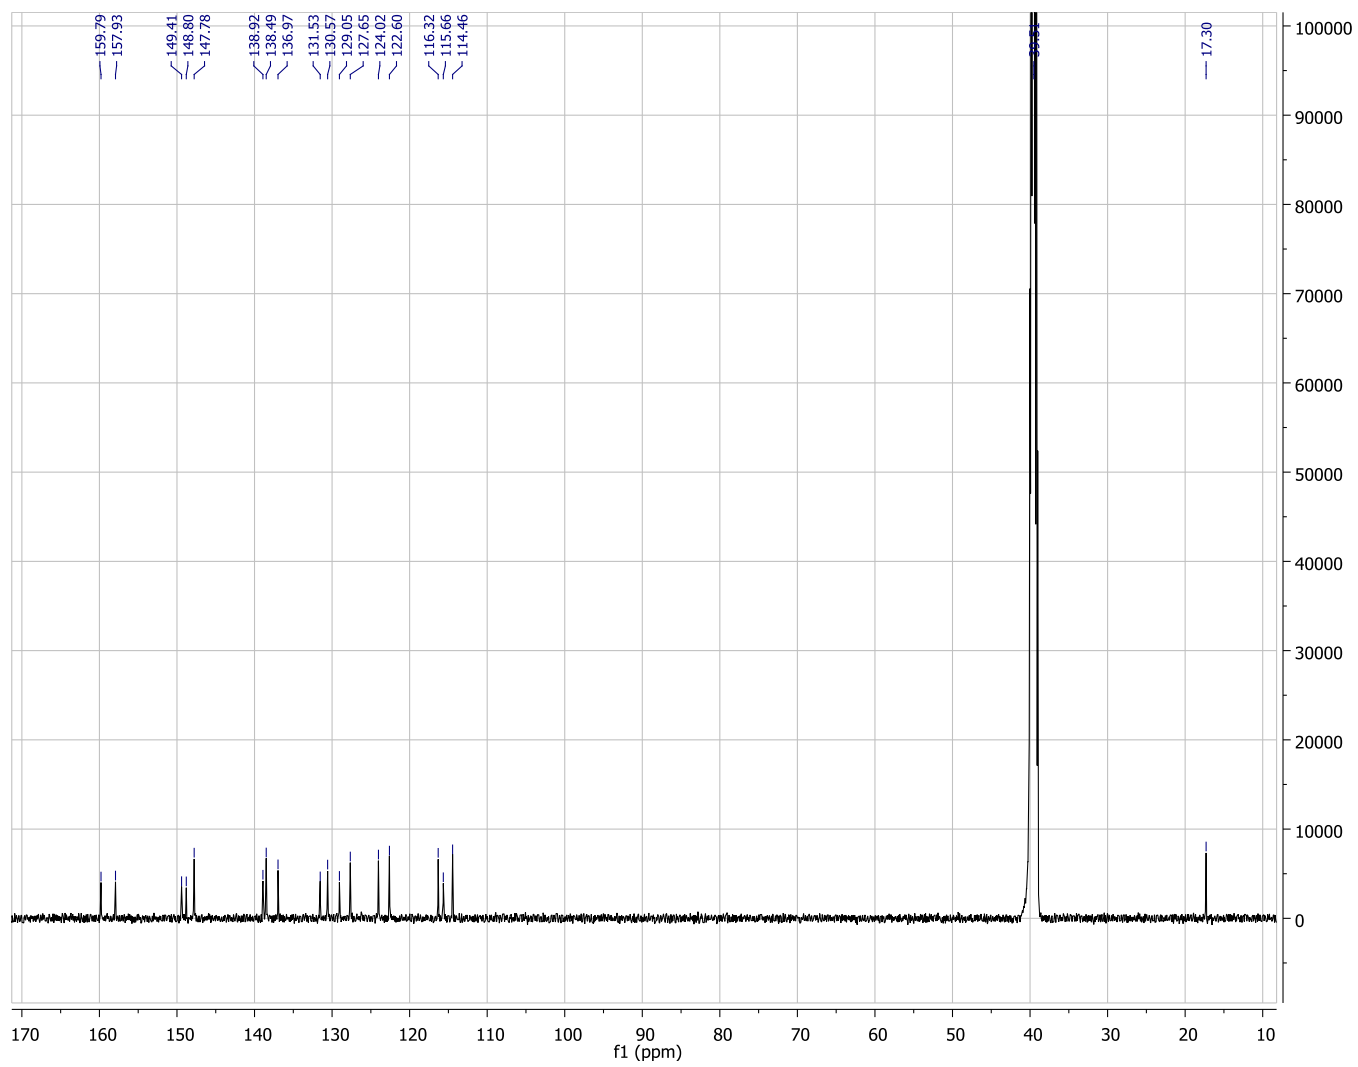

<sup>13</sup>C NMR spectrum of 10

Generic Display Report (all)

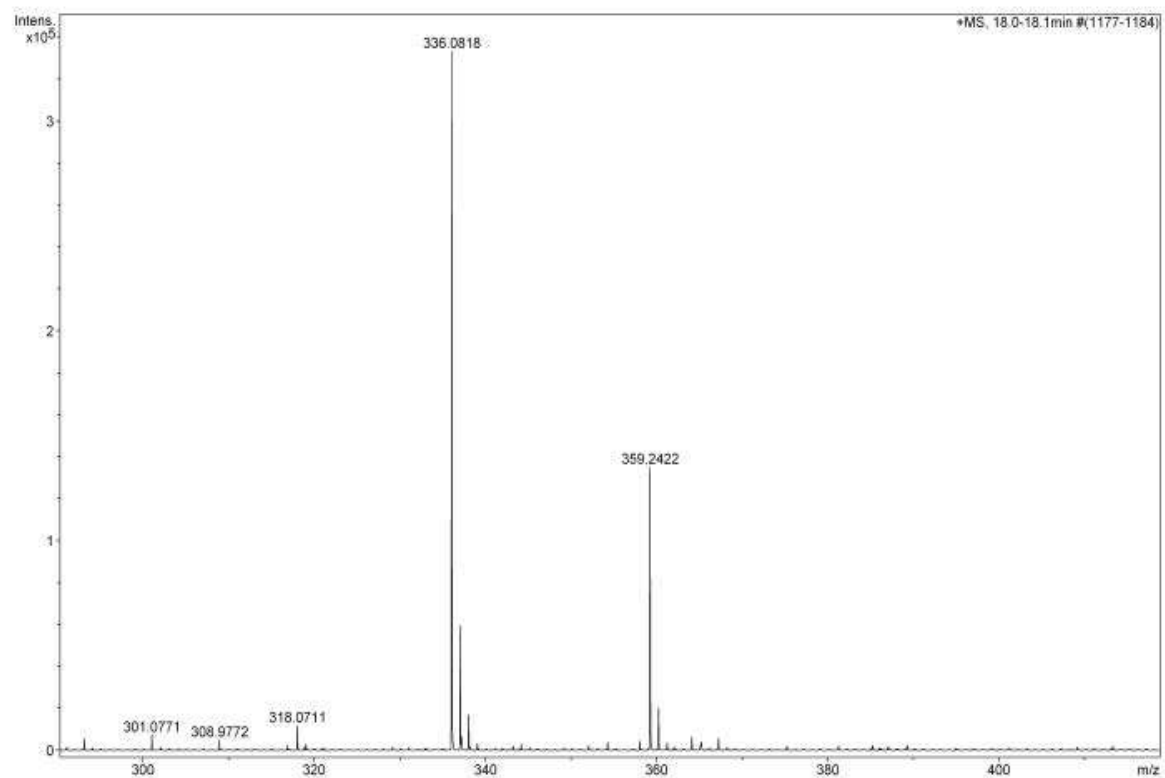

HRMS (TOF) of 10

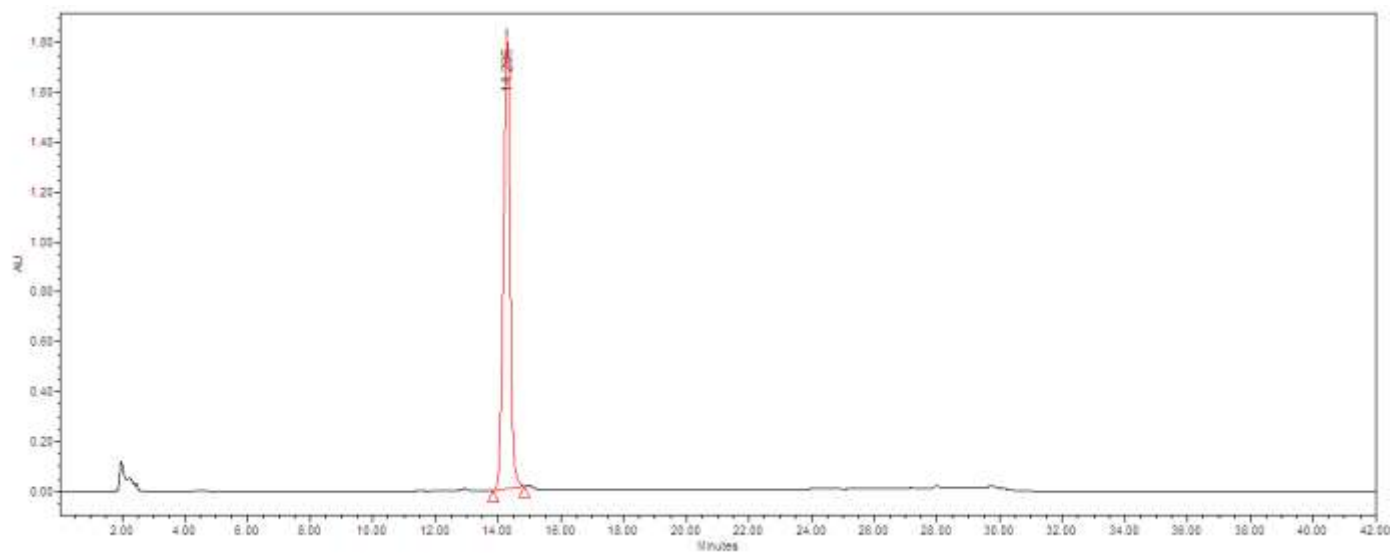

**HPLC scan of 10**

| <b>Retention time (min)</b> | <b>% Area</b> |
|-----------------------------|---------------|
| 14.286                      | 100           |



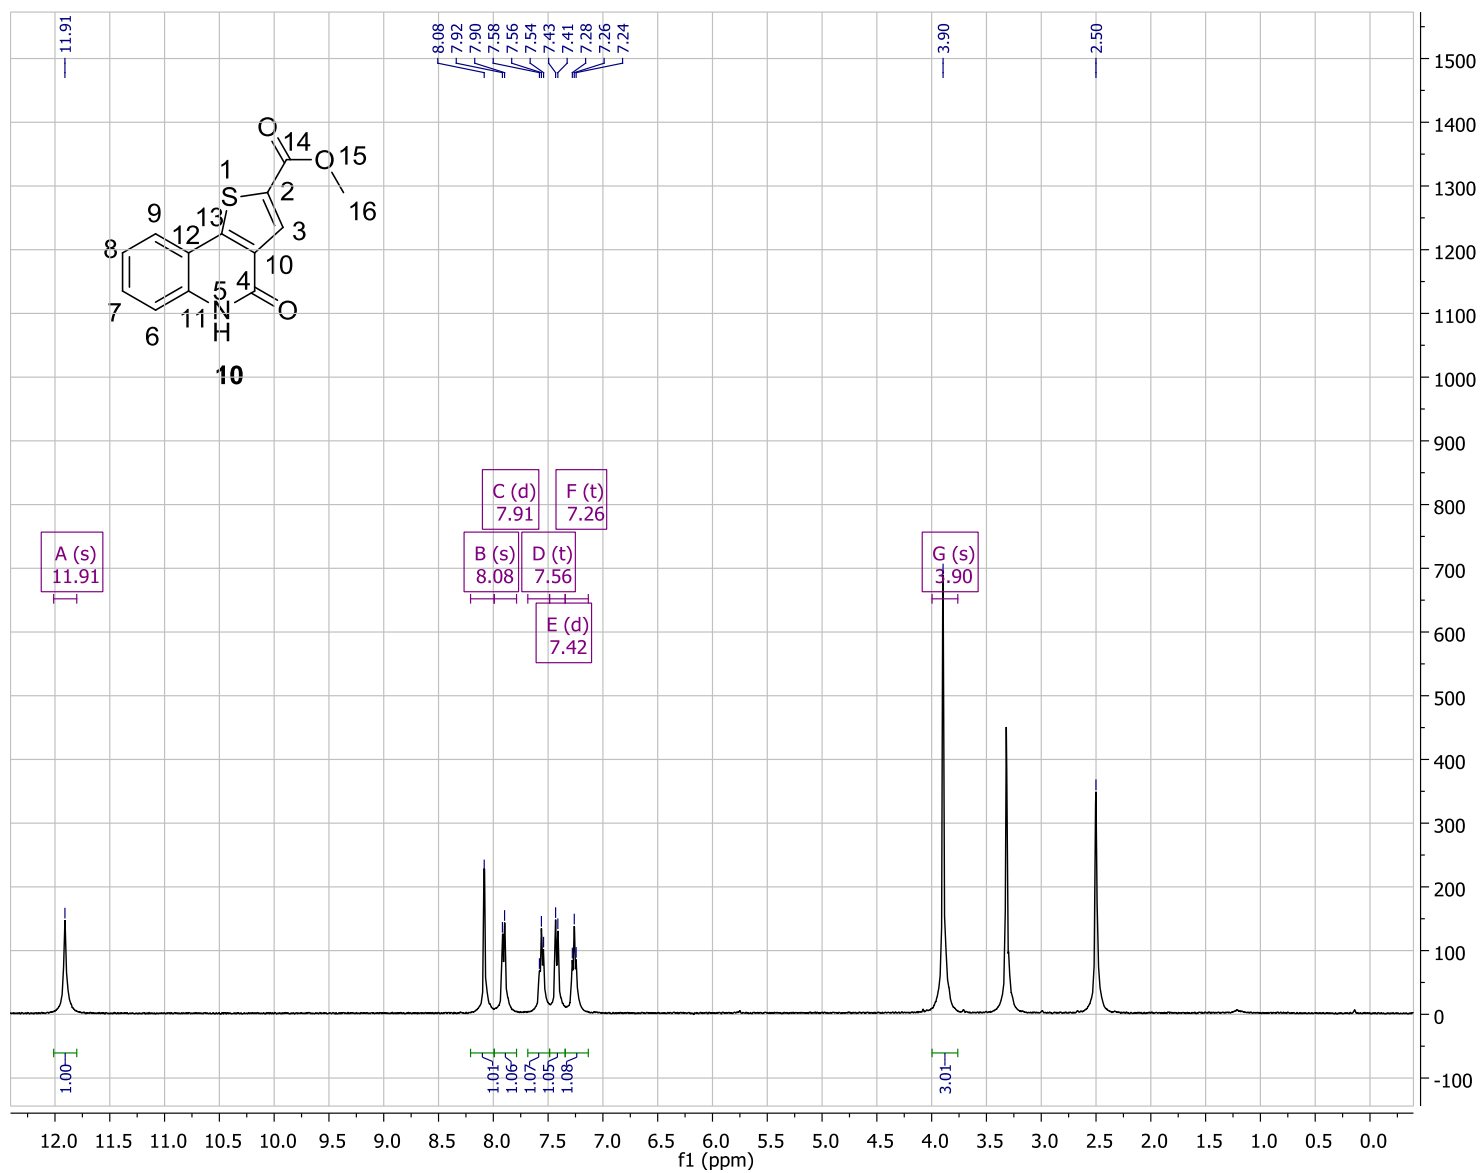

<sup>1</sup>H NMR spectrum of 24

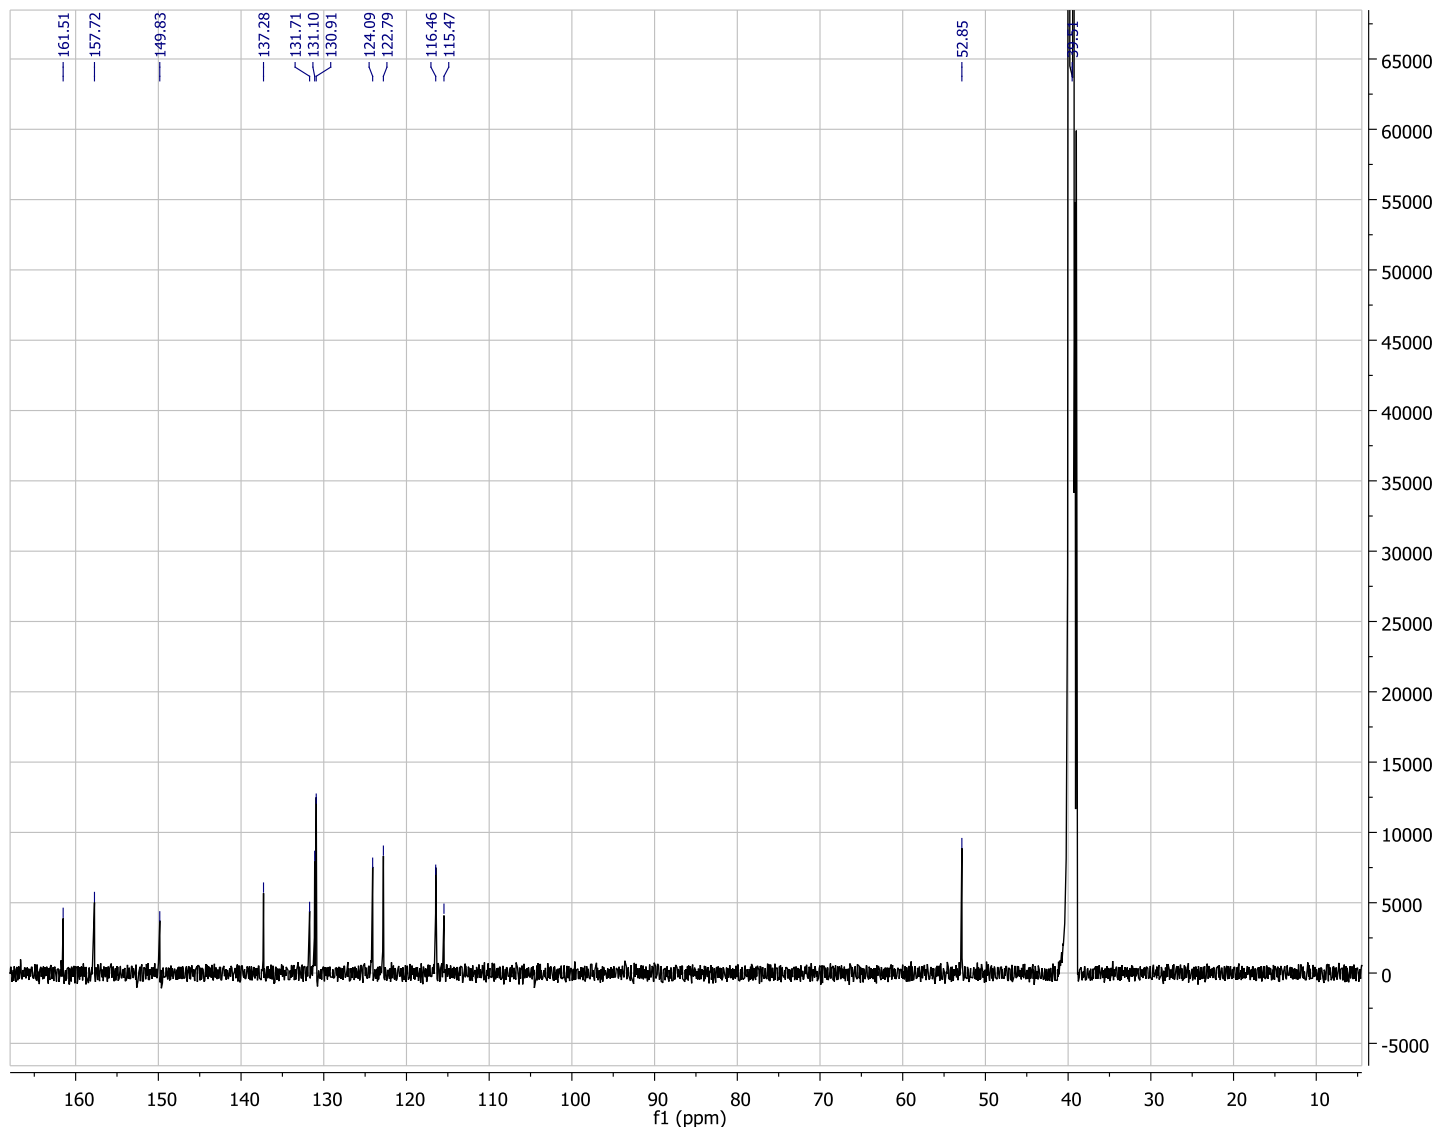

$^{13}\text{C}$  NMR spectrum of 24

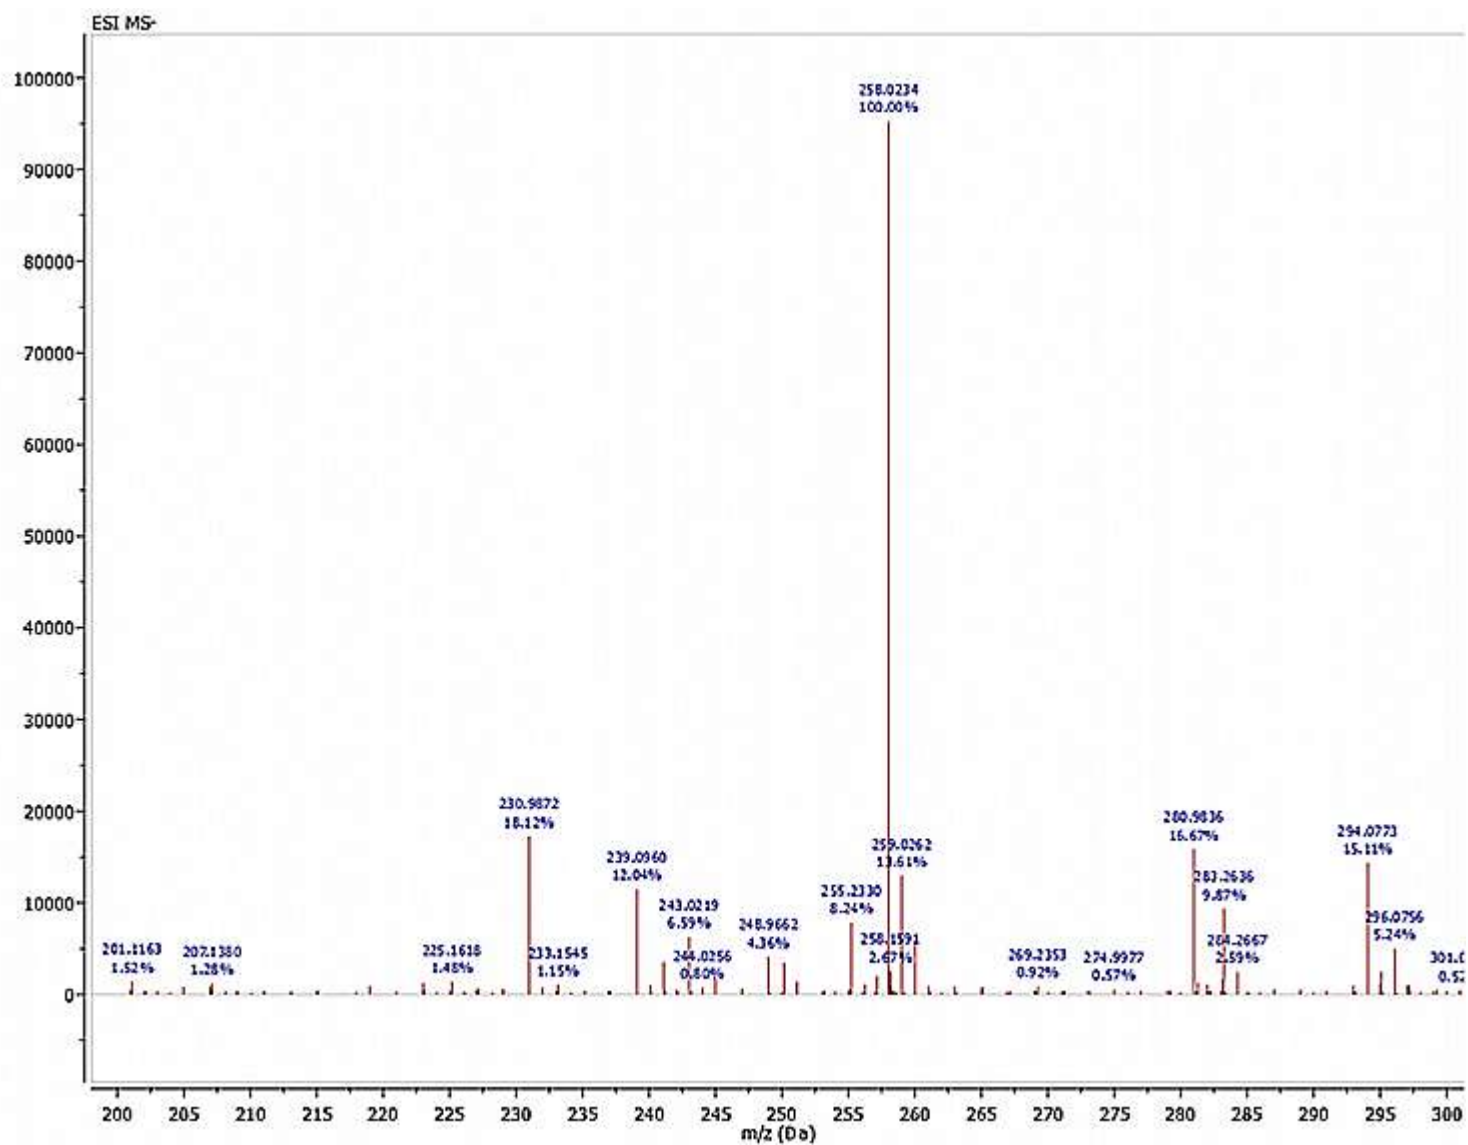

HRMS (TOF) of 24

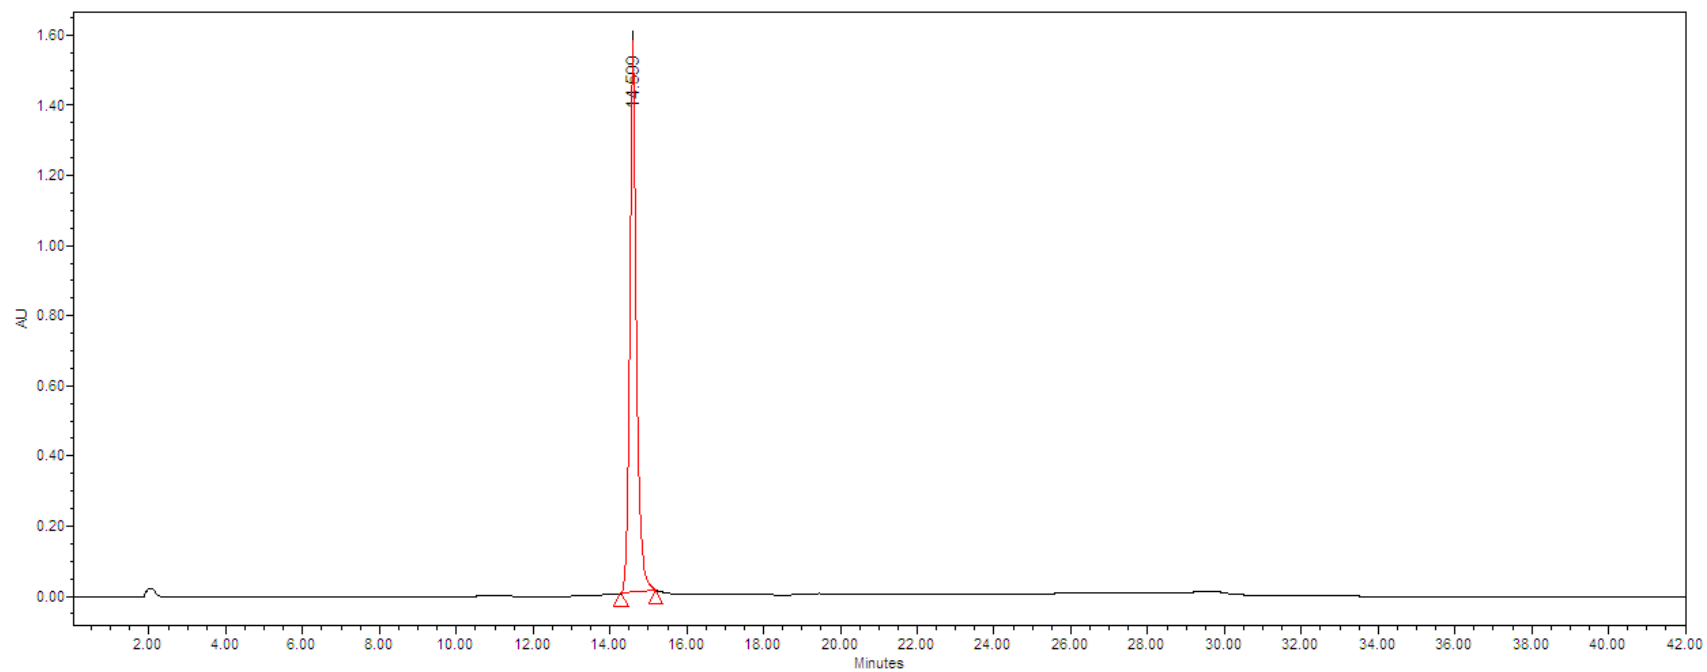

**HPLC scan of 24**

| <b>Retention time (min)</b> | <b>% Area</b> |
|-----------------------------|---------------|
| 14.599                      | 99.65         |

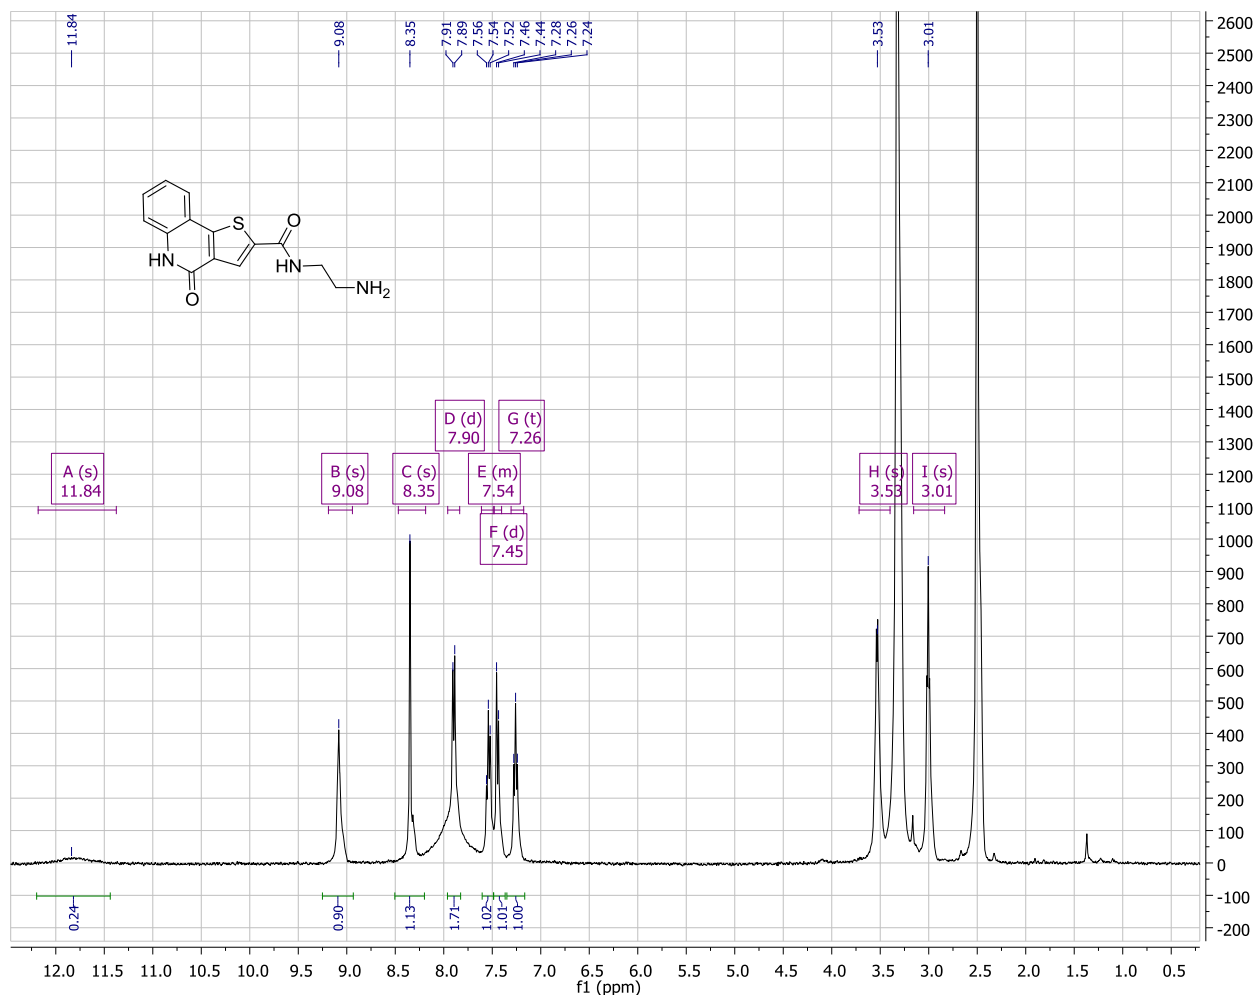

<sup>1</sup>H NMR spectrum of 25i

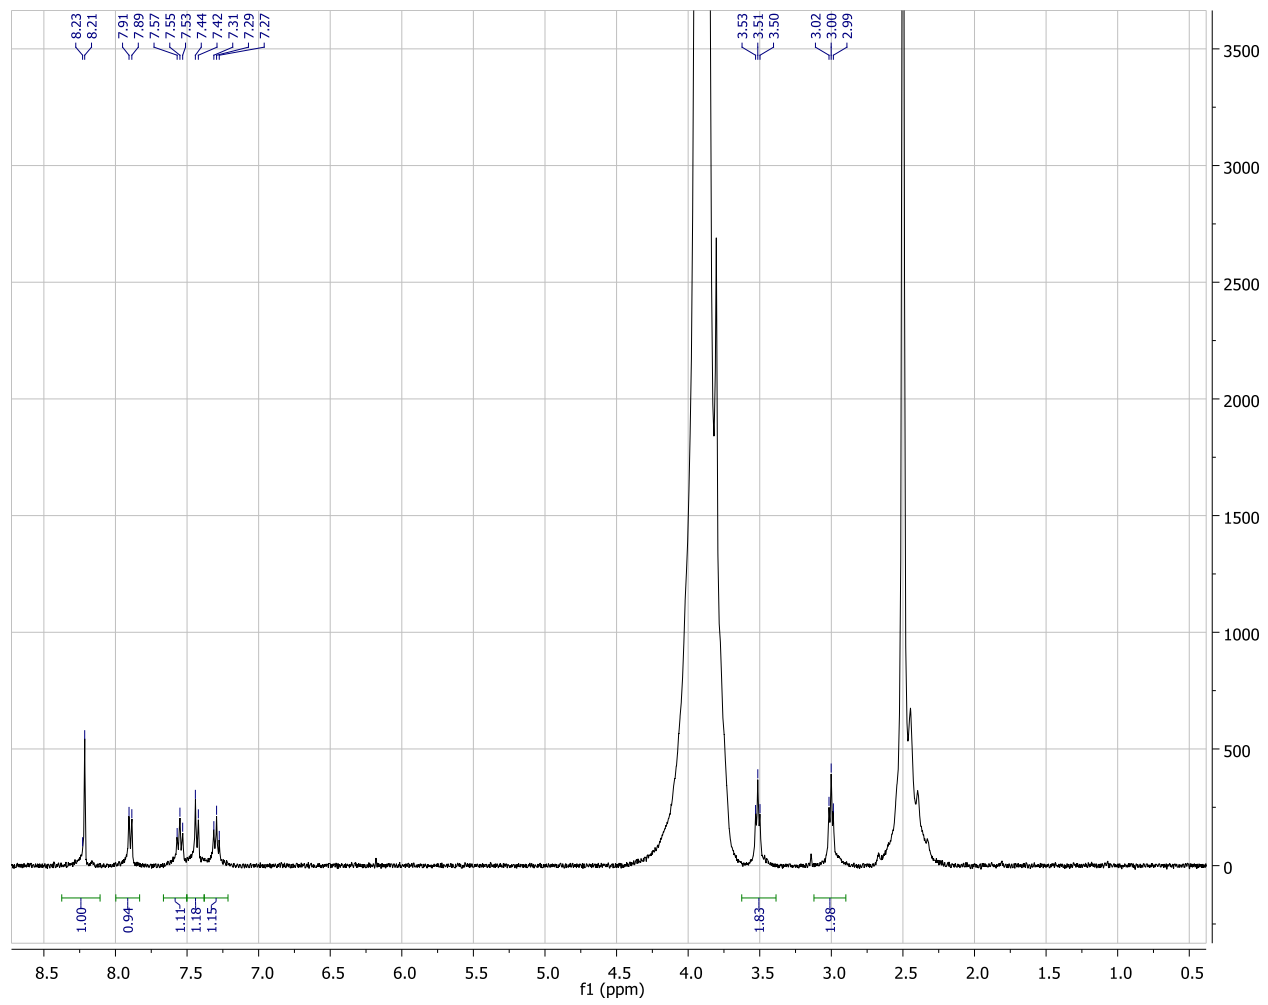

$^1\text{H}$  NMR ( $\text{D}_2\text{O}$  wash) spectrum of 25i

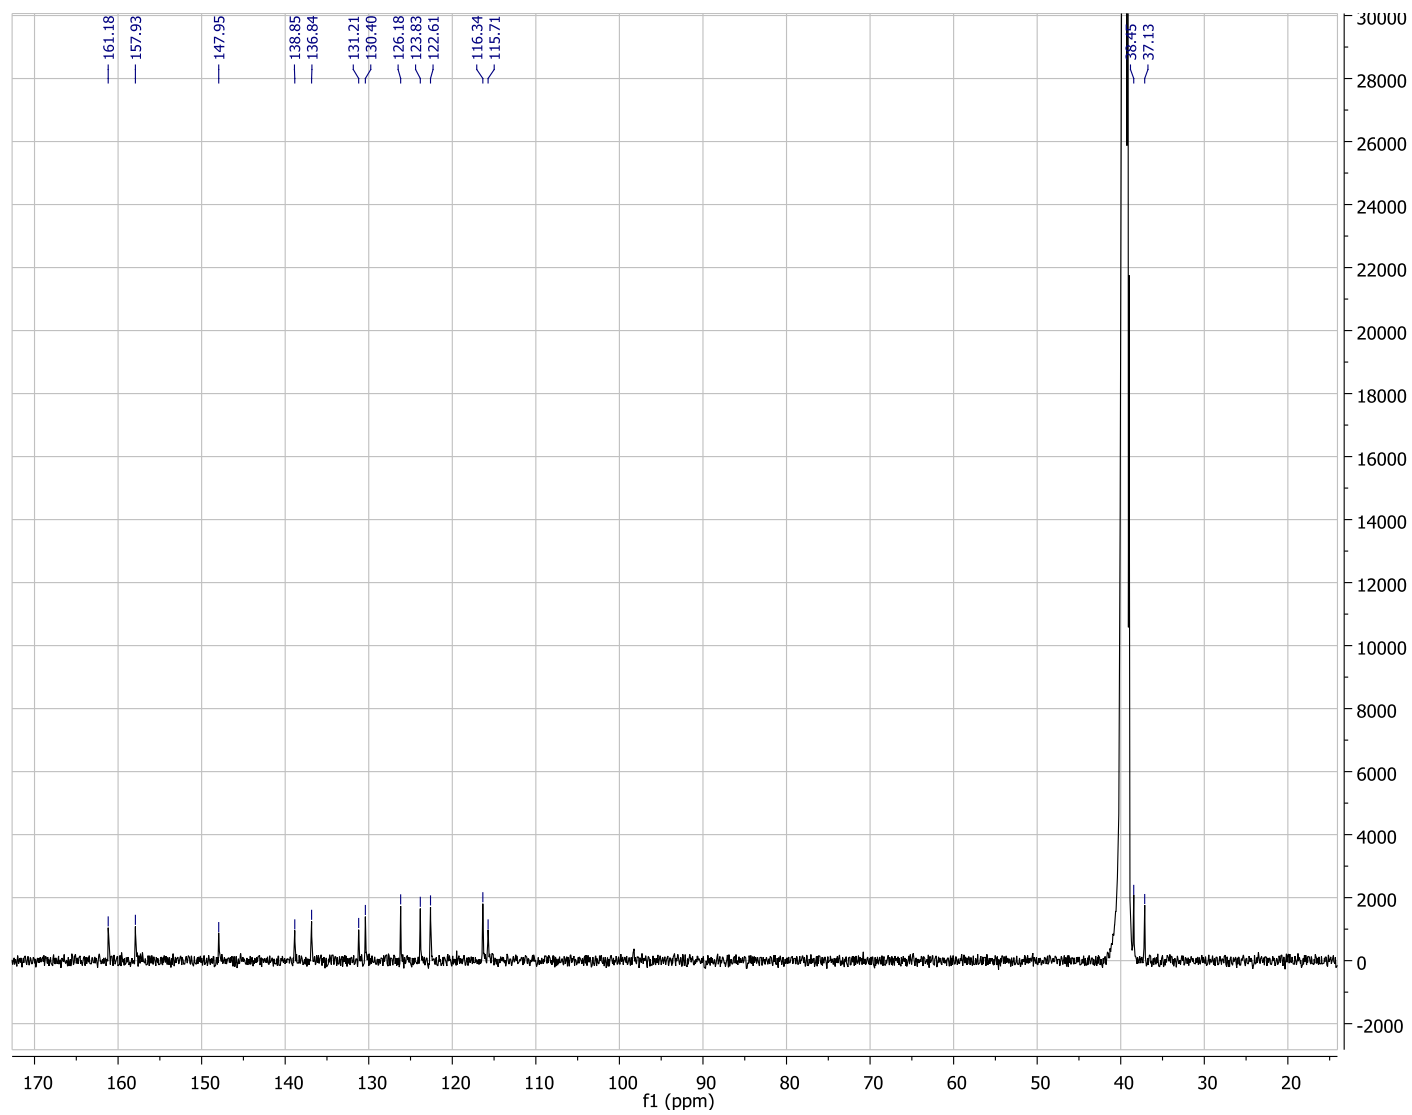

$^{13}\text{C}$  NMR spectrum of 25i

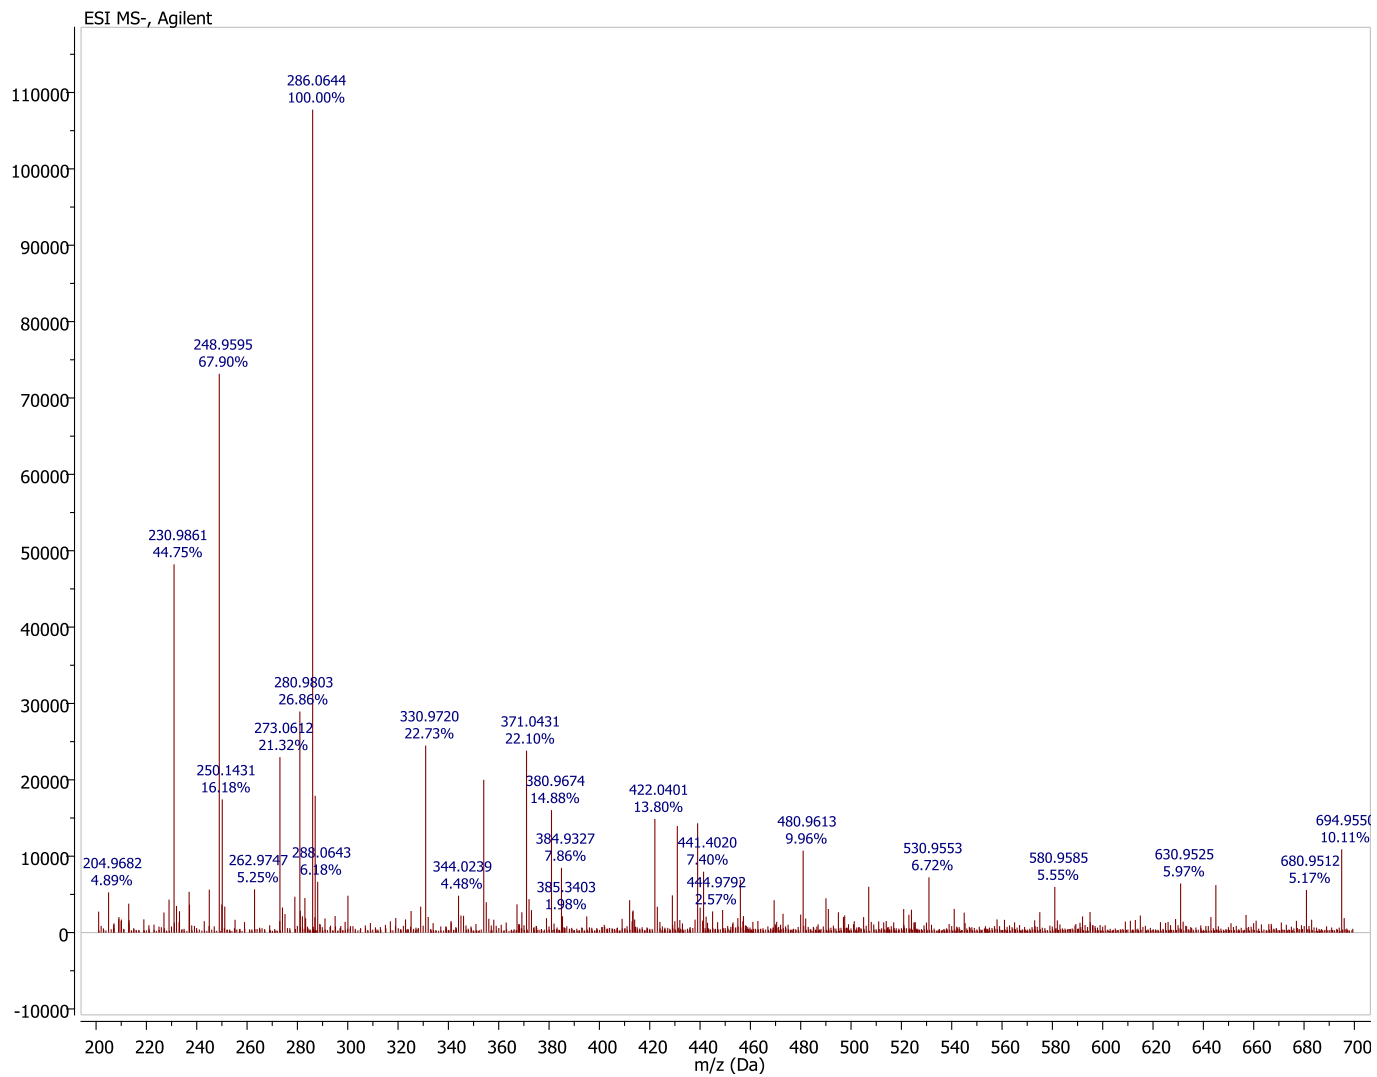

HRMS (TOF) of 25i



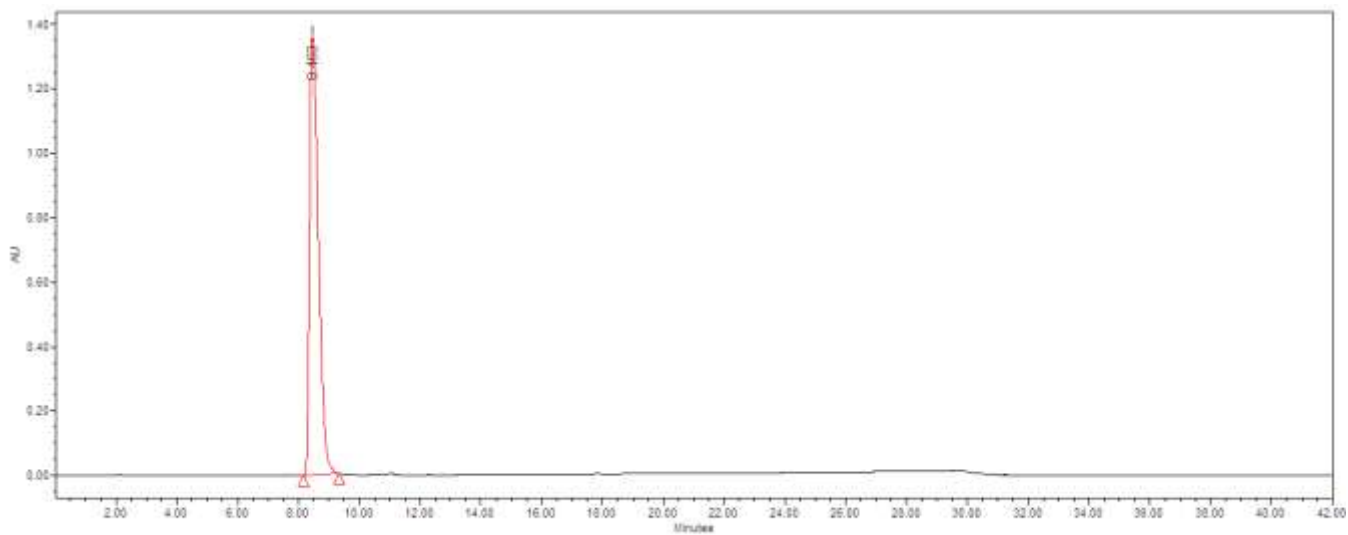

HPLC scan of 25i

| Retention time (min) | % Area |
|----------------------|--------|
| 8.463                | 100    |

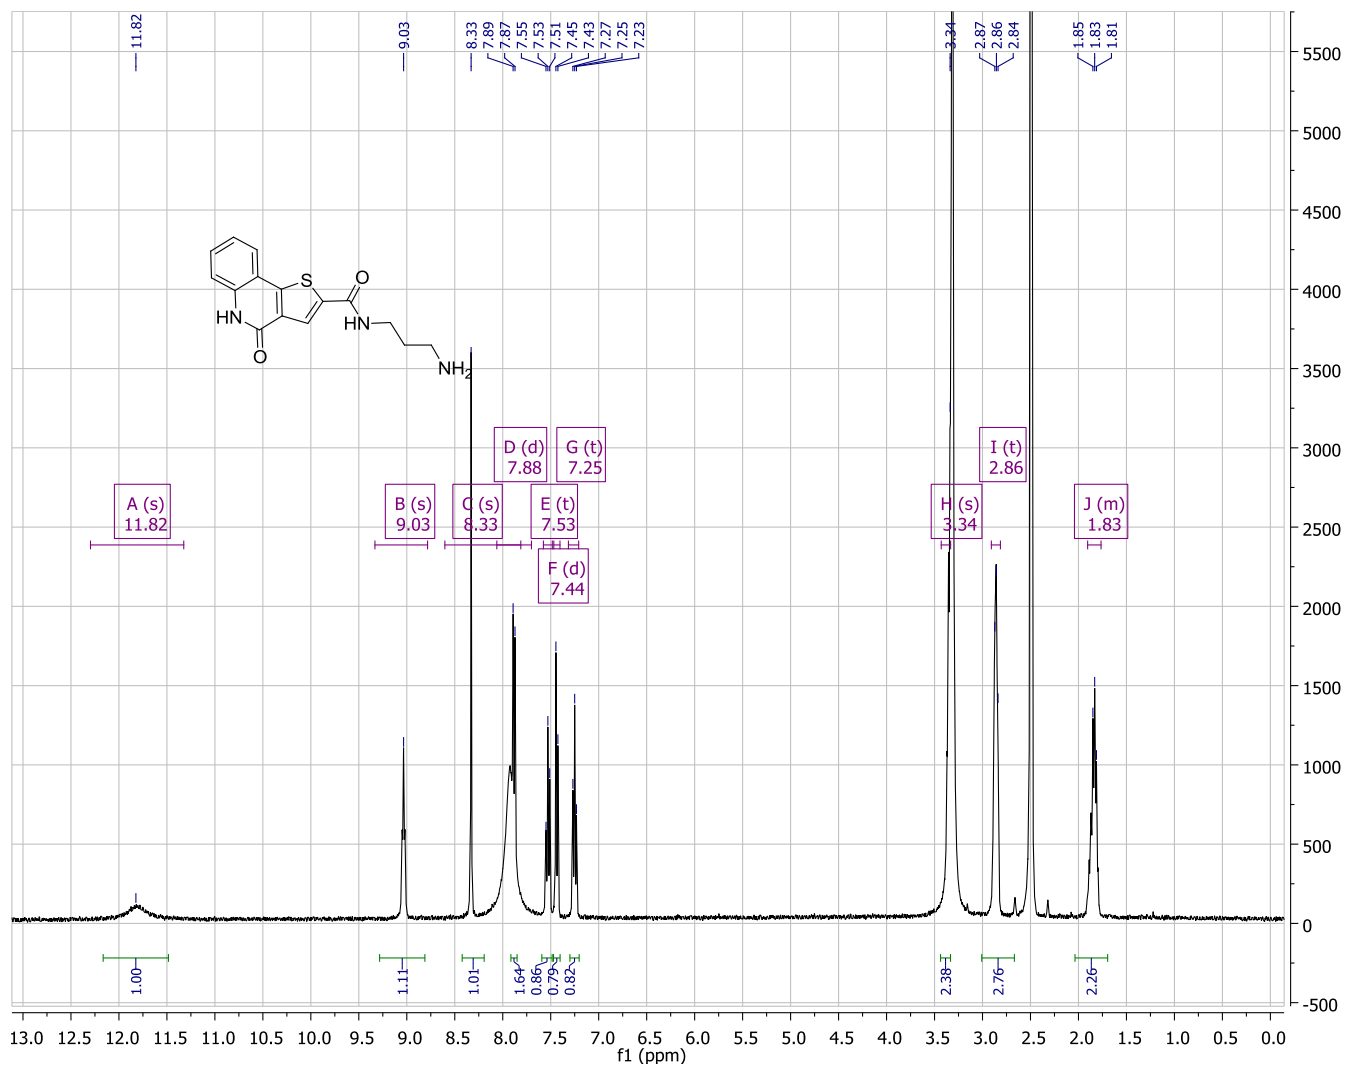

<sup>1</sup>H NMR spectrum of 25k

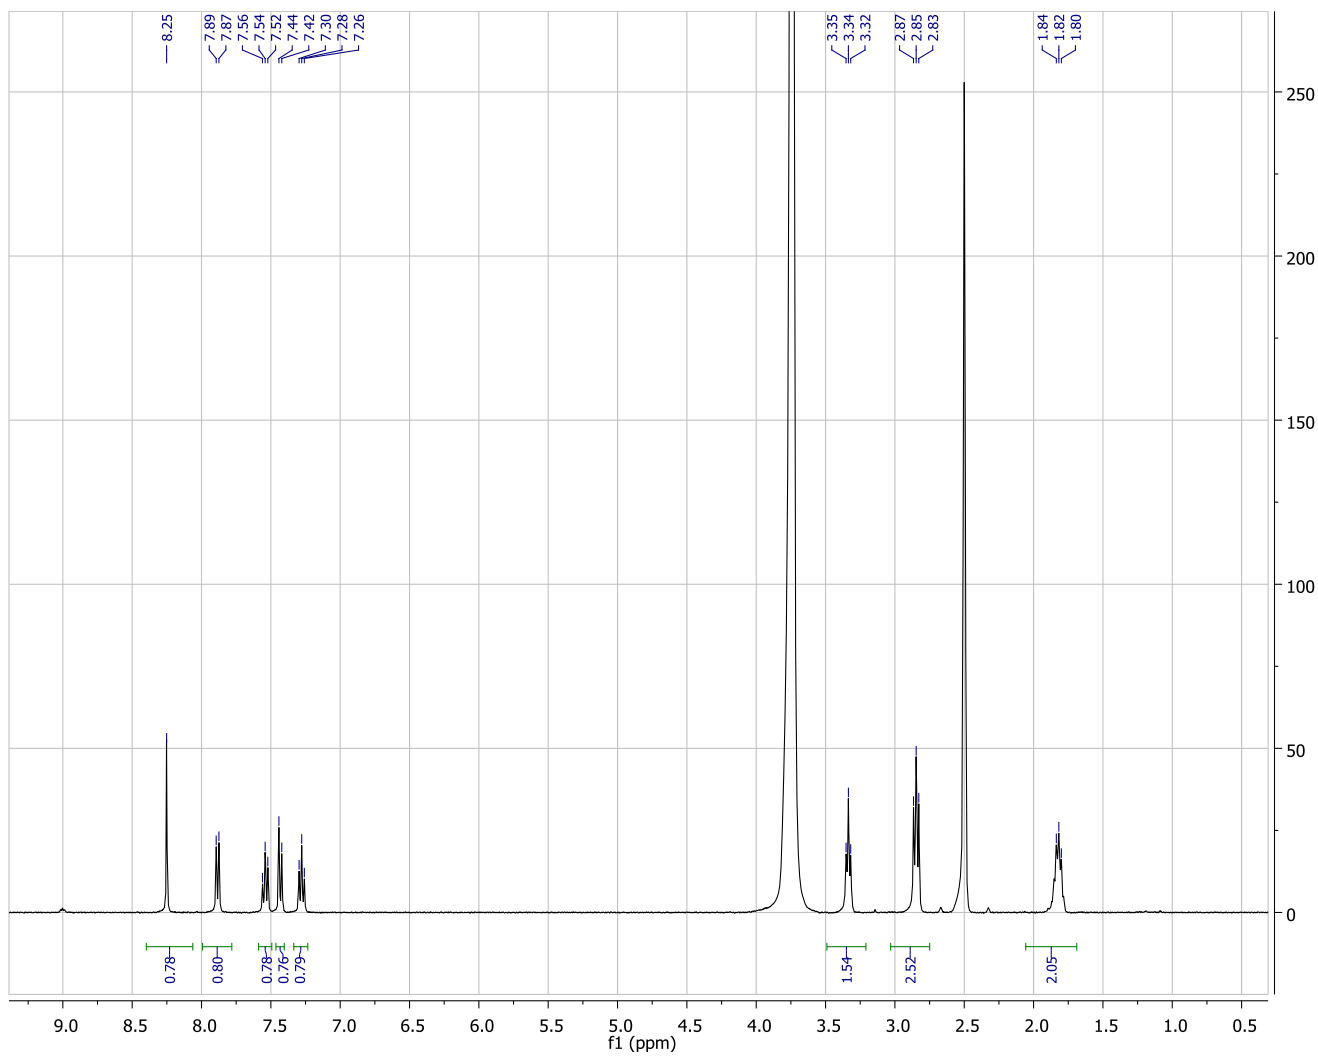

$^1\text{H}$  NMR ( $\text{D}_2\text{O}$  wash) spectrum of 25k

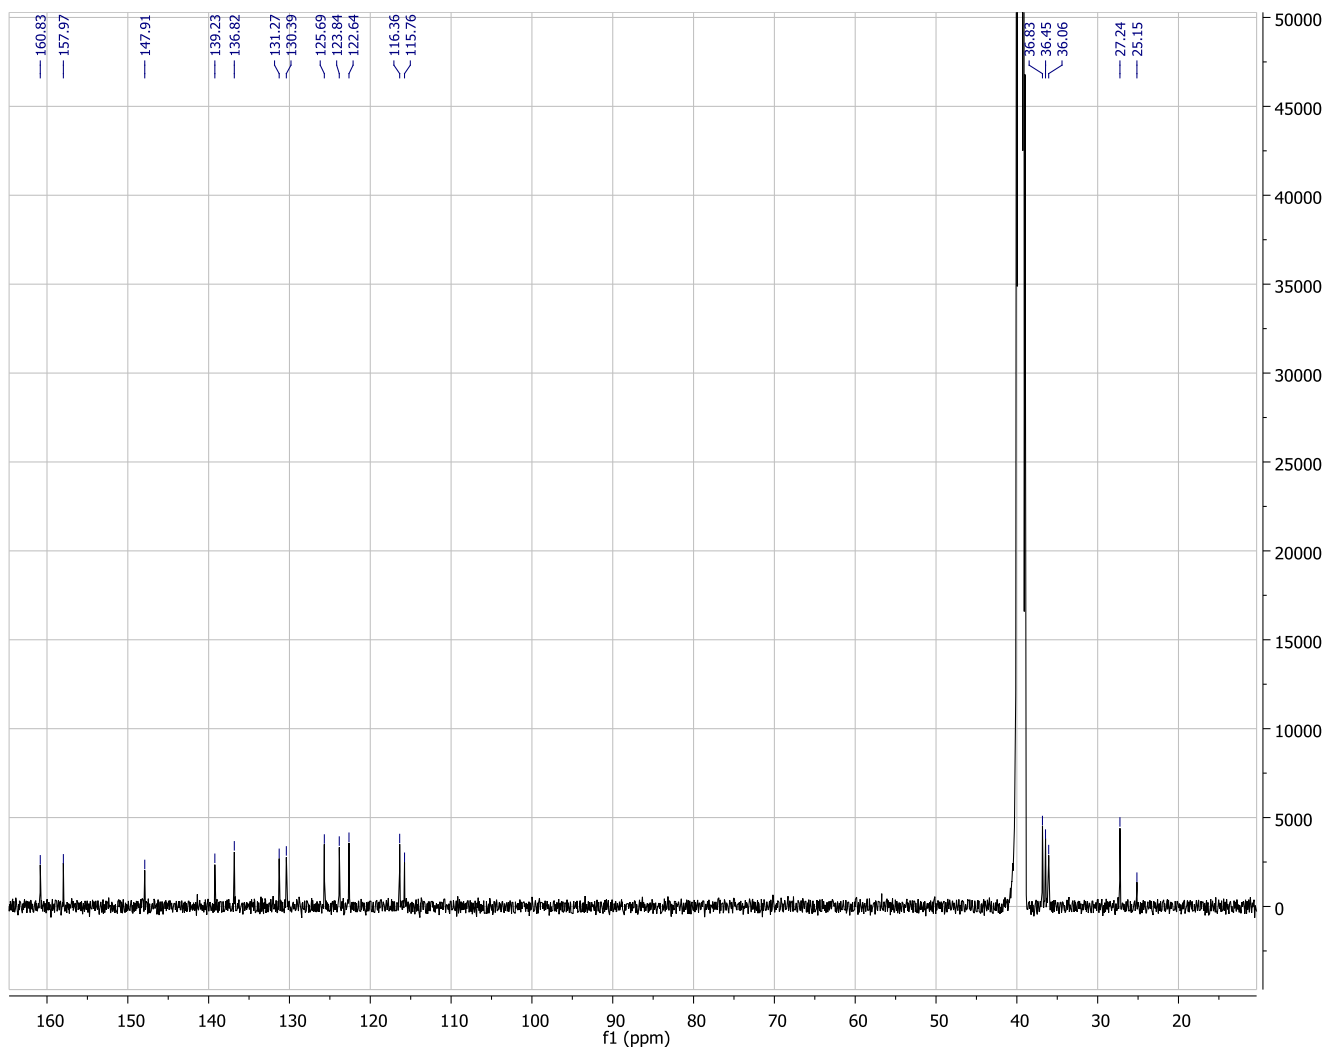

$^{13}\text{C}$  NMR spectrum of 25k

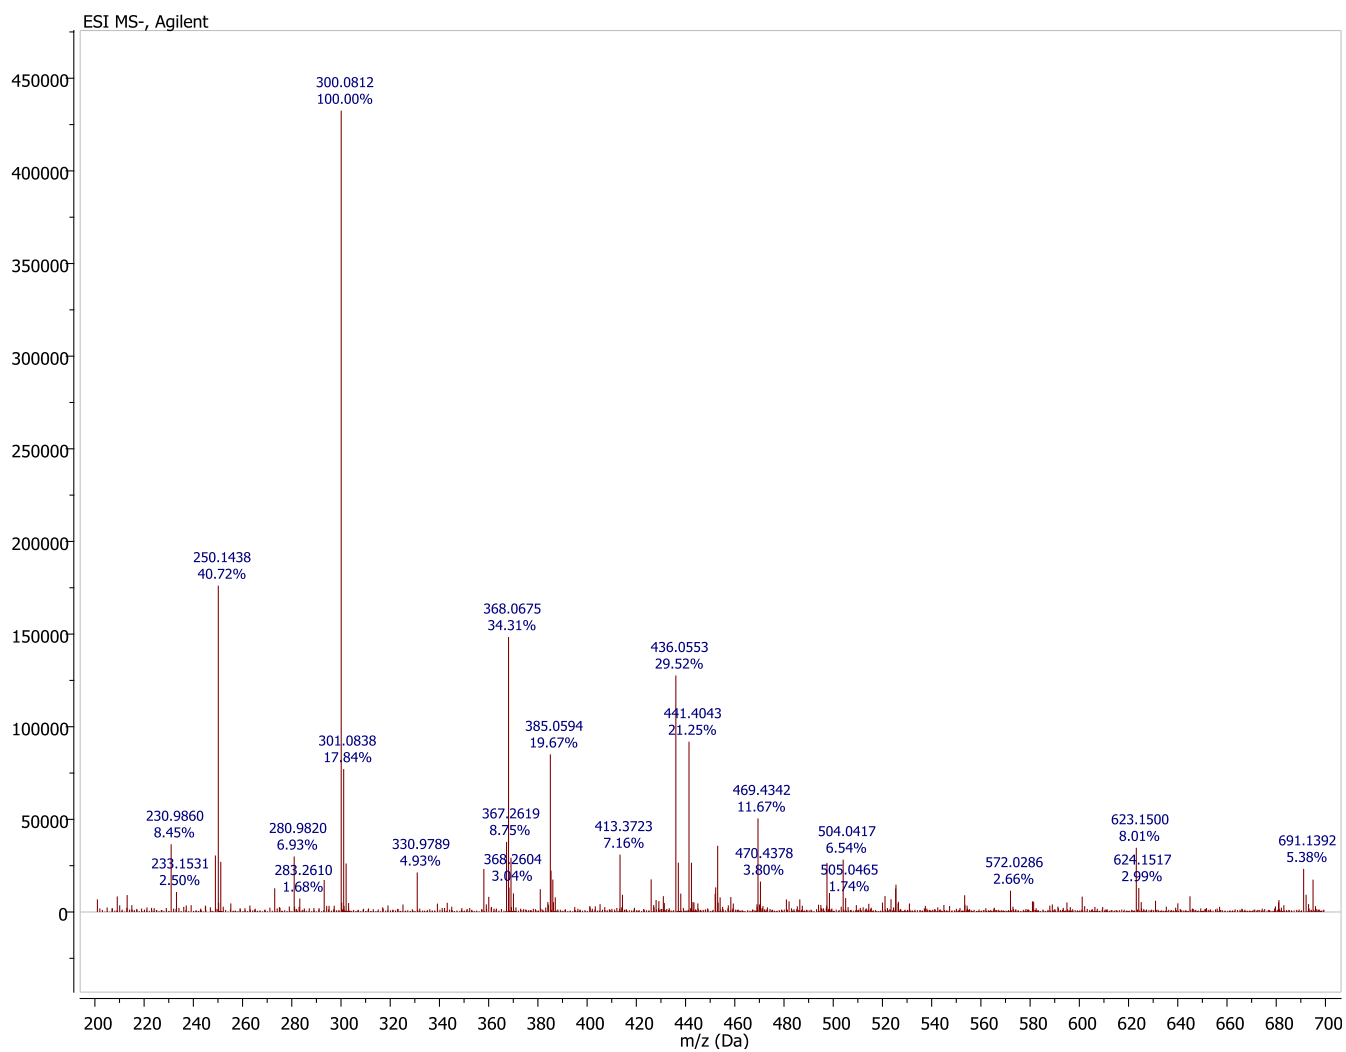

HRMS (TOF) of 25k

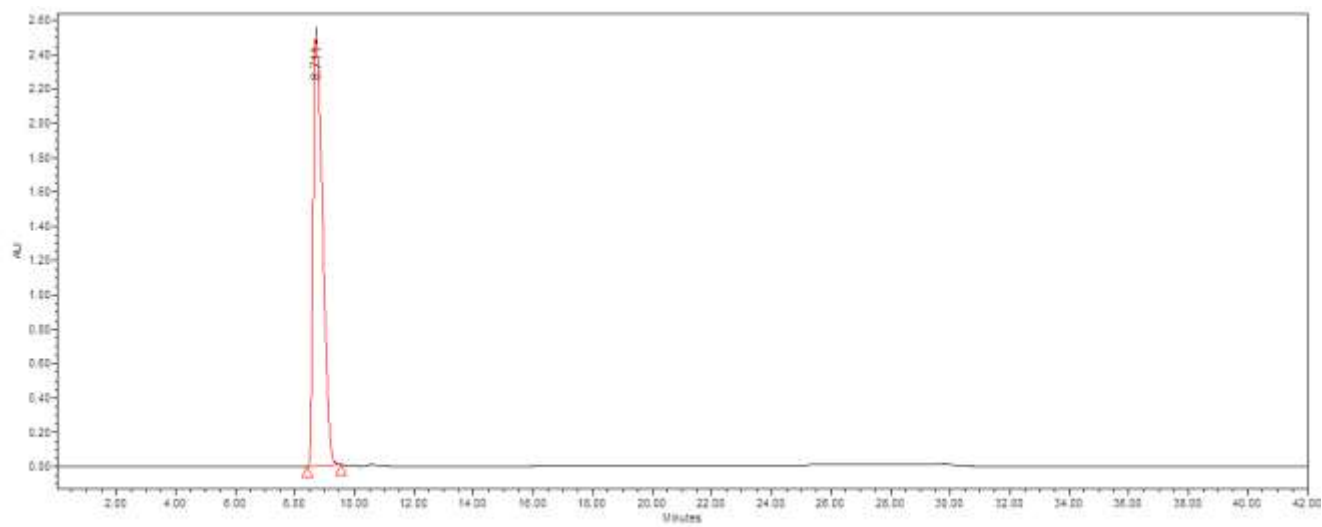

**HPLC scan of 25k**

| <b>Retention time (min)</b> | <b>% Area</b> |
|-----------------------------|---------------|
| 8.711                       | 100           |

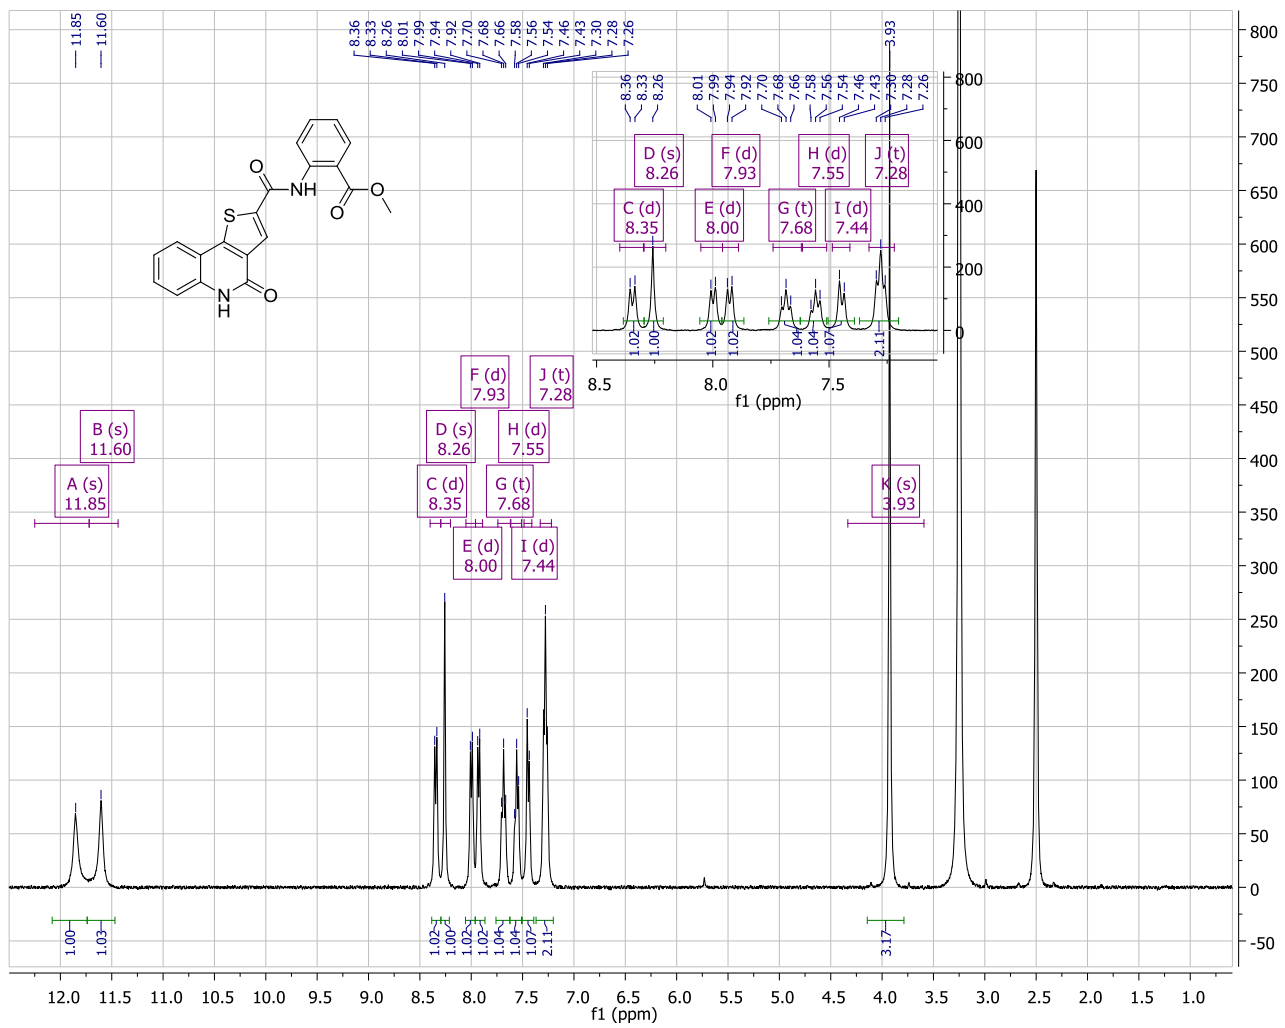

<sup>1</sup>H NMR spectrum of 25r

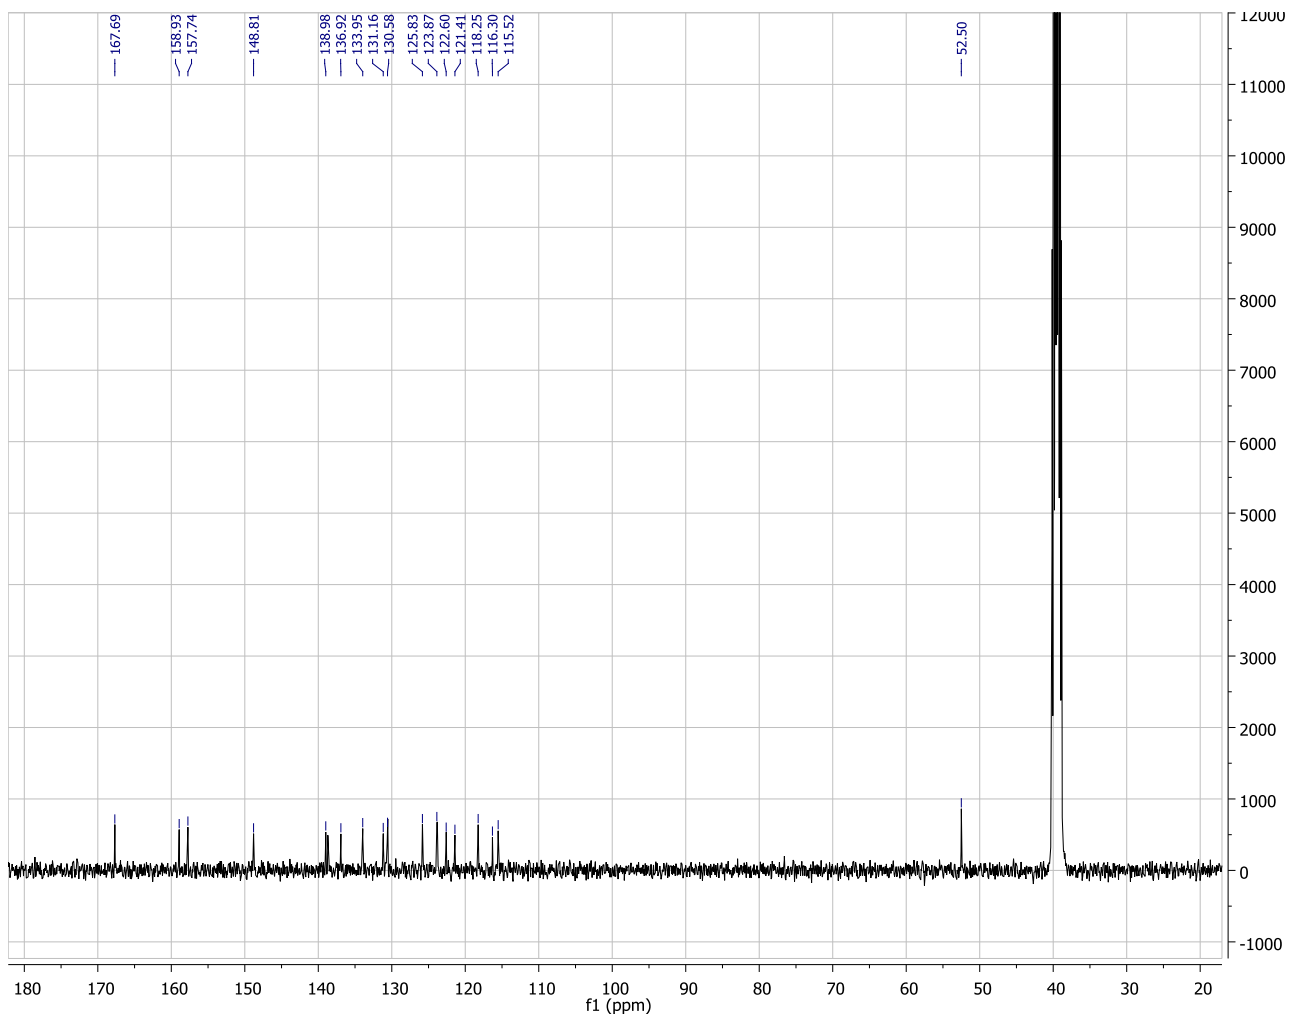

$^{13}\text{C}$  NMR spectrum of 25r



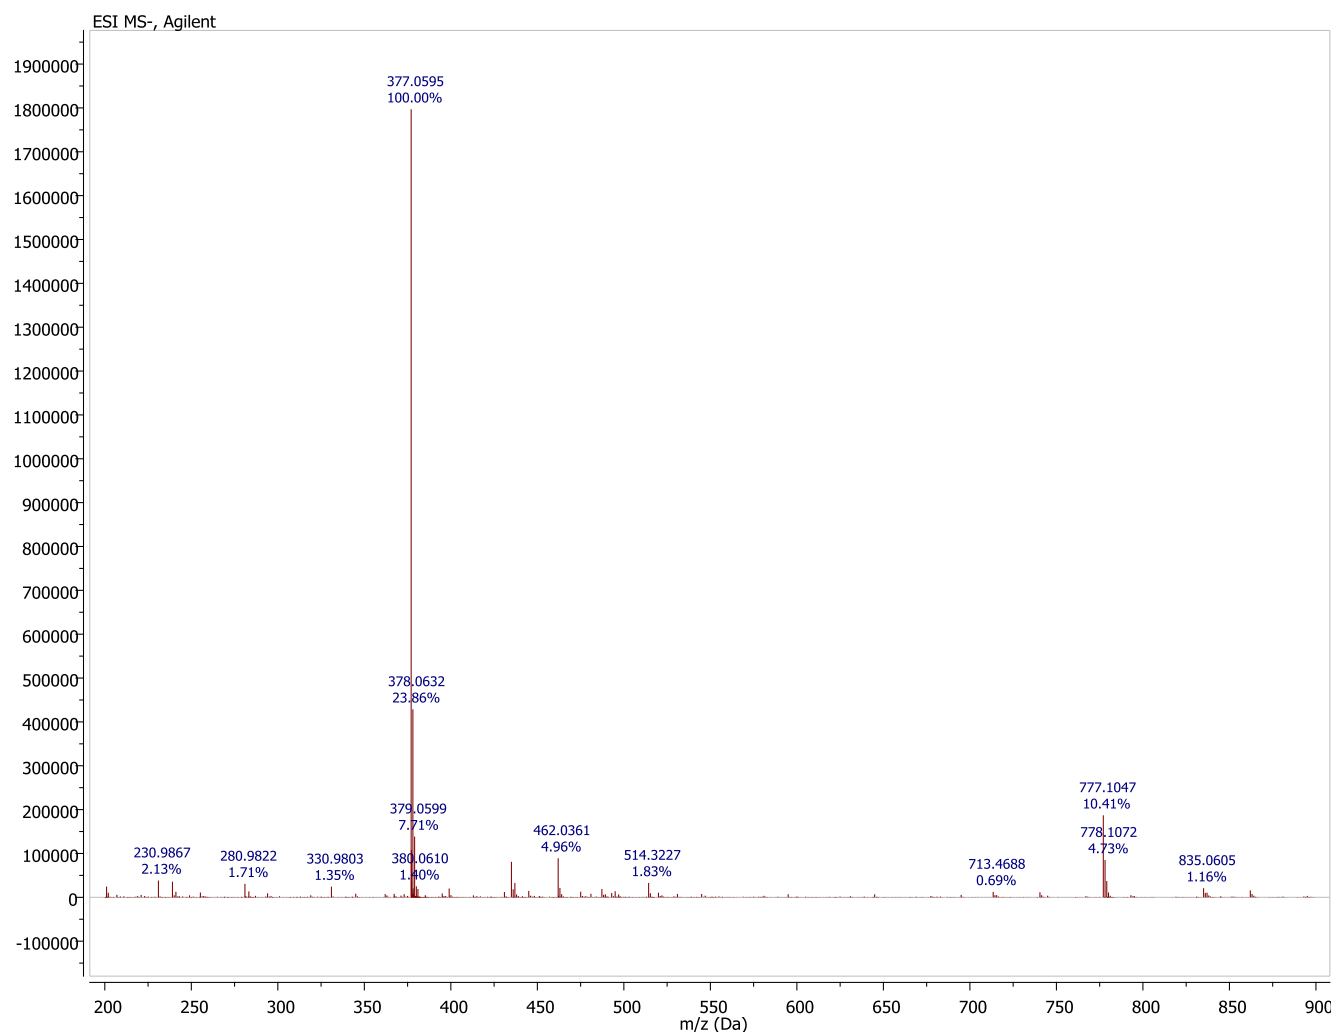

**HRMS (TOF) of 25r**

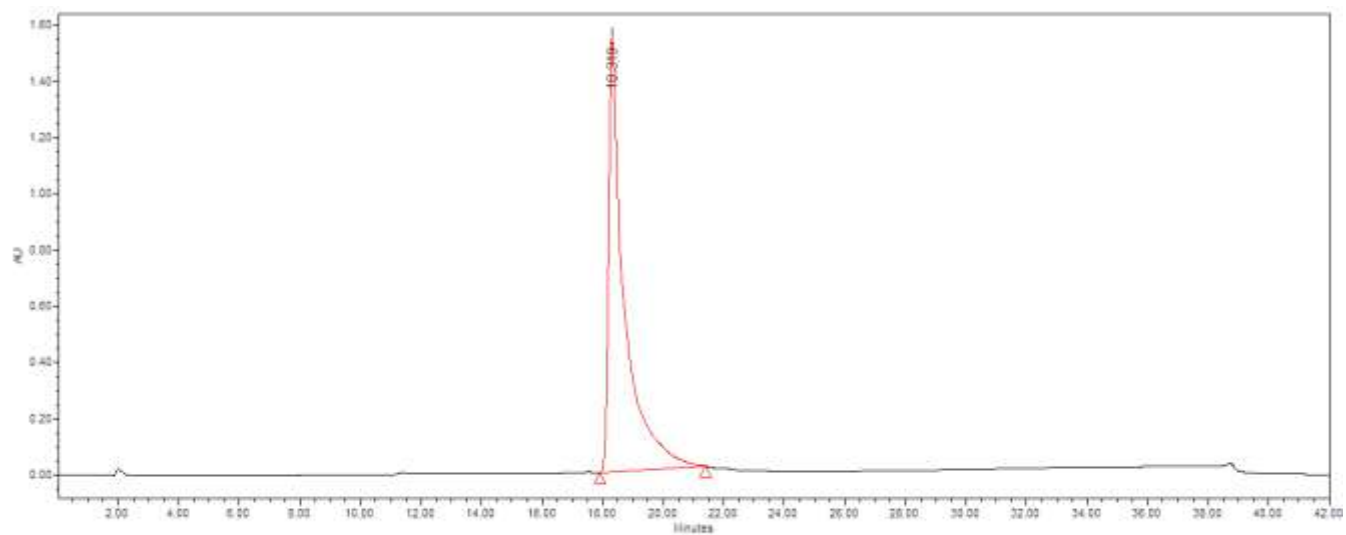

HPLC scan of 25r

| Retention time (min) | % Area |
|----------------------|--------|
| 18.319               | 100    |

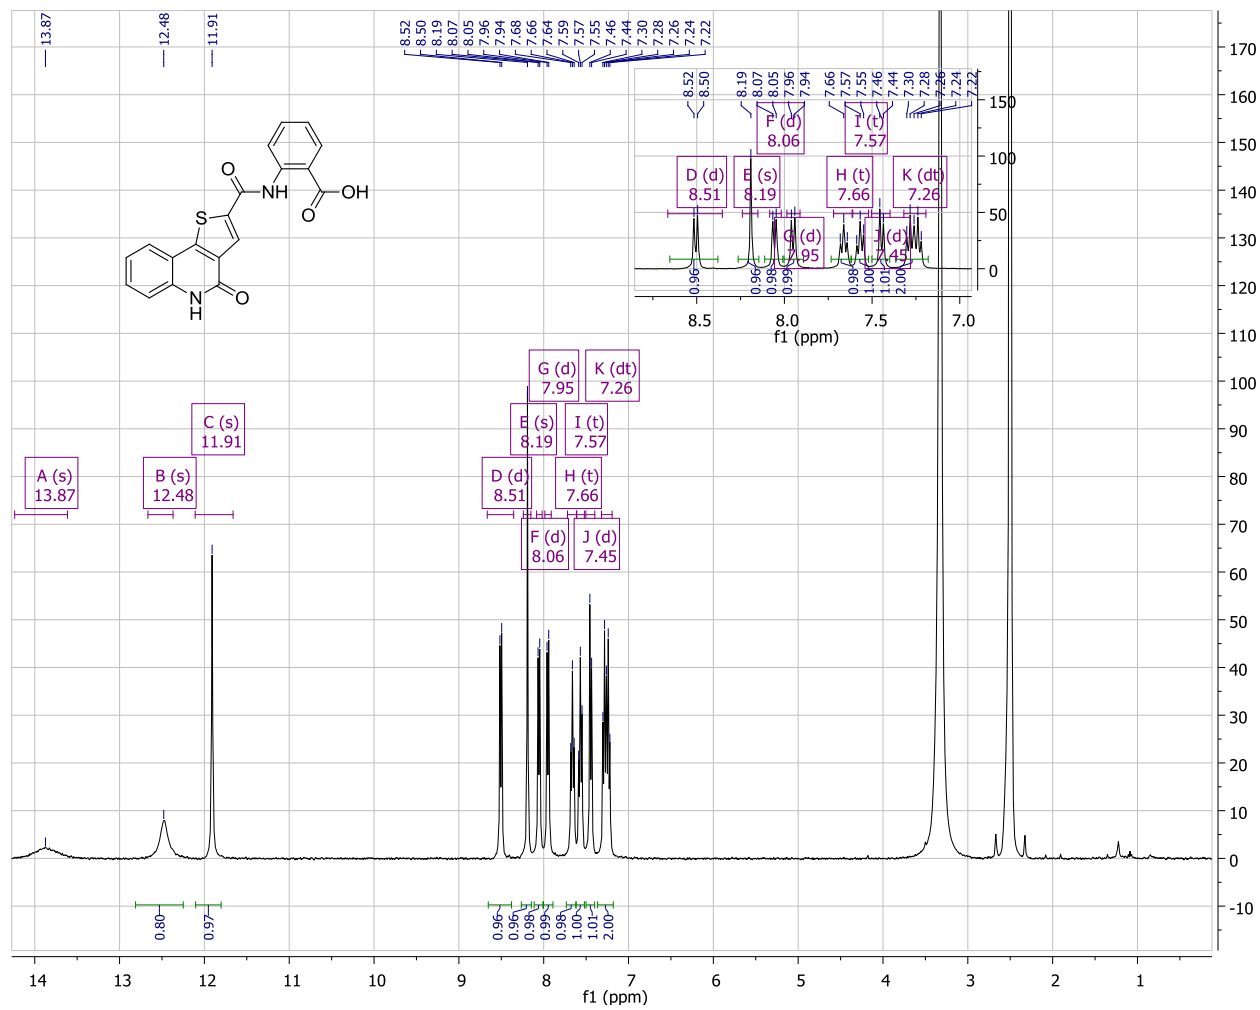

<sup>1</sup>H NMR spectrum of 25s

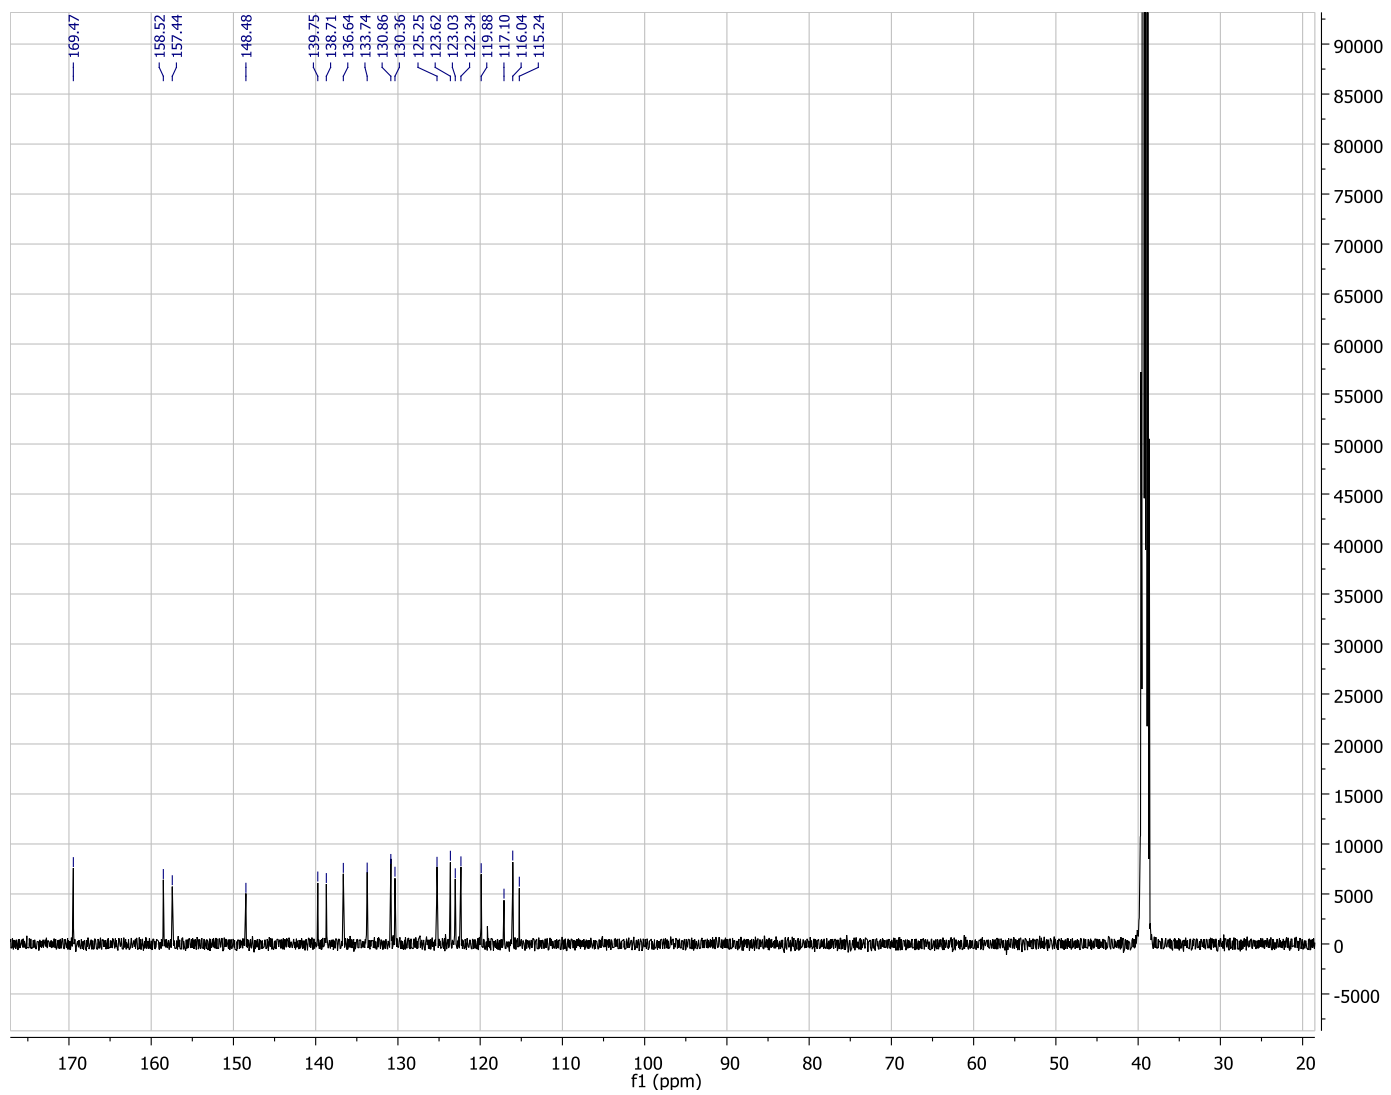

$^{13}\text{C}$  NMR spectrum of 25s

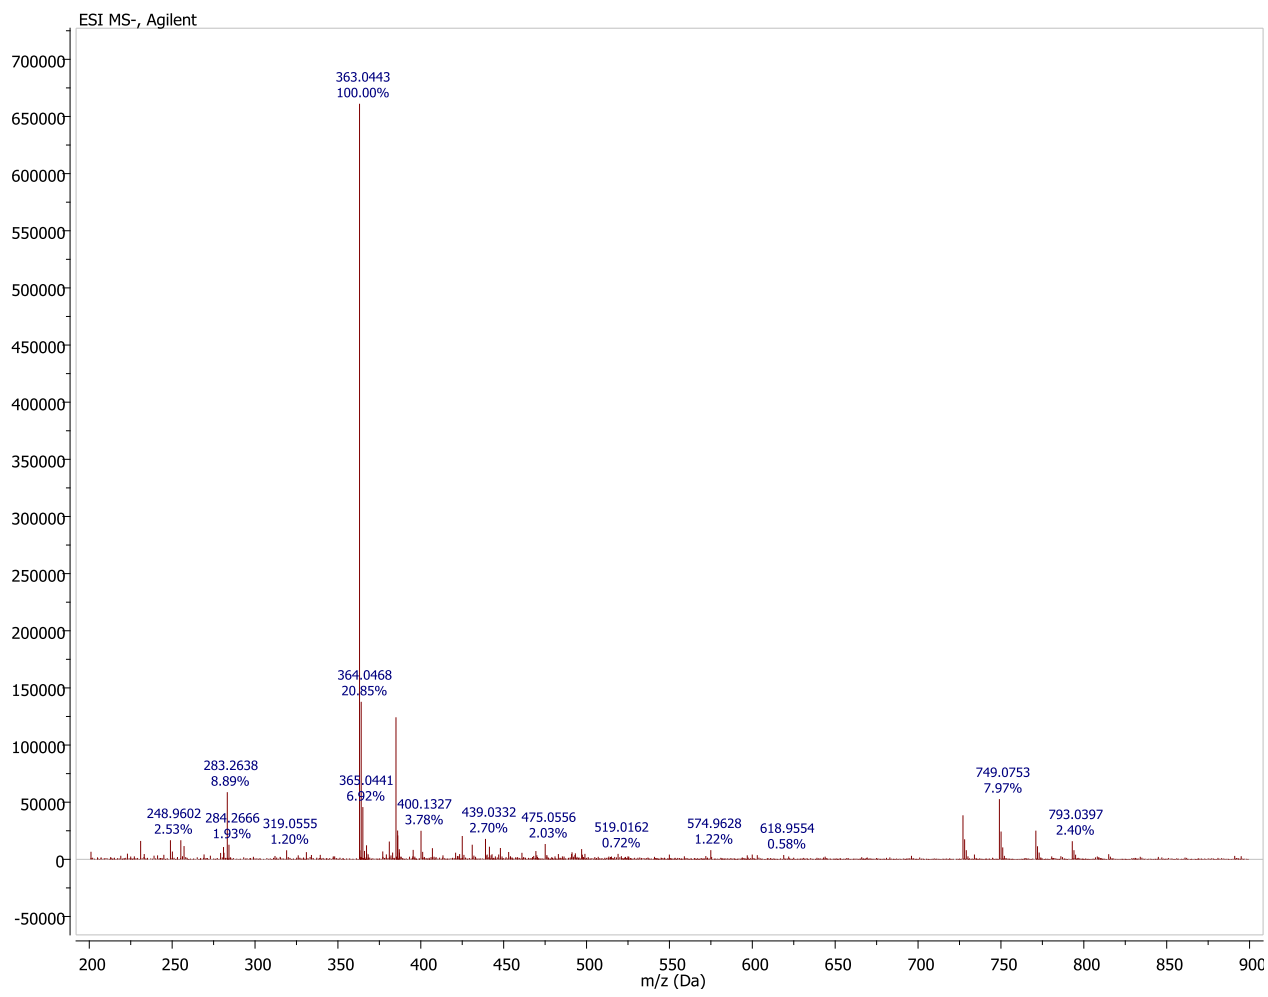

HRMS (TOF) of 25r

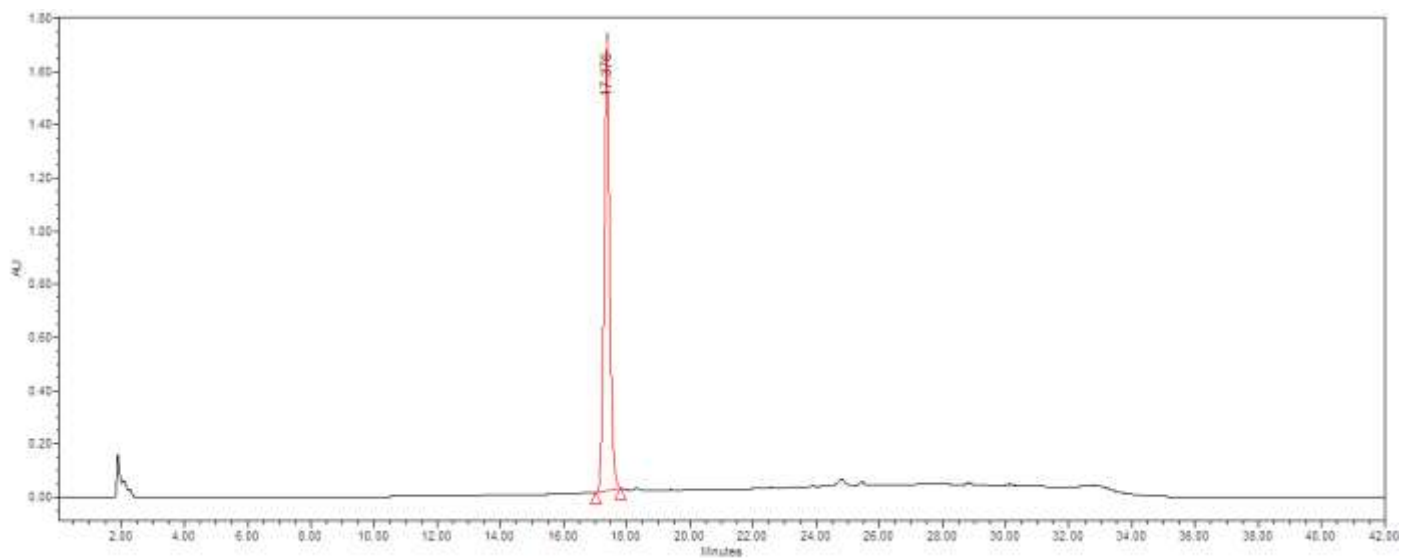

HPLC scan of 25s

| Retention time (min) | % Area |
|----------------------|--------|
| 17.376               | 100    |

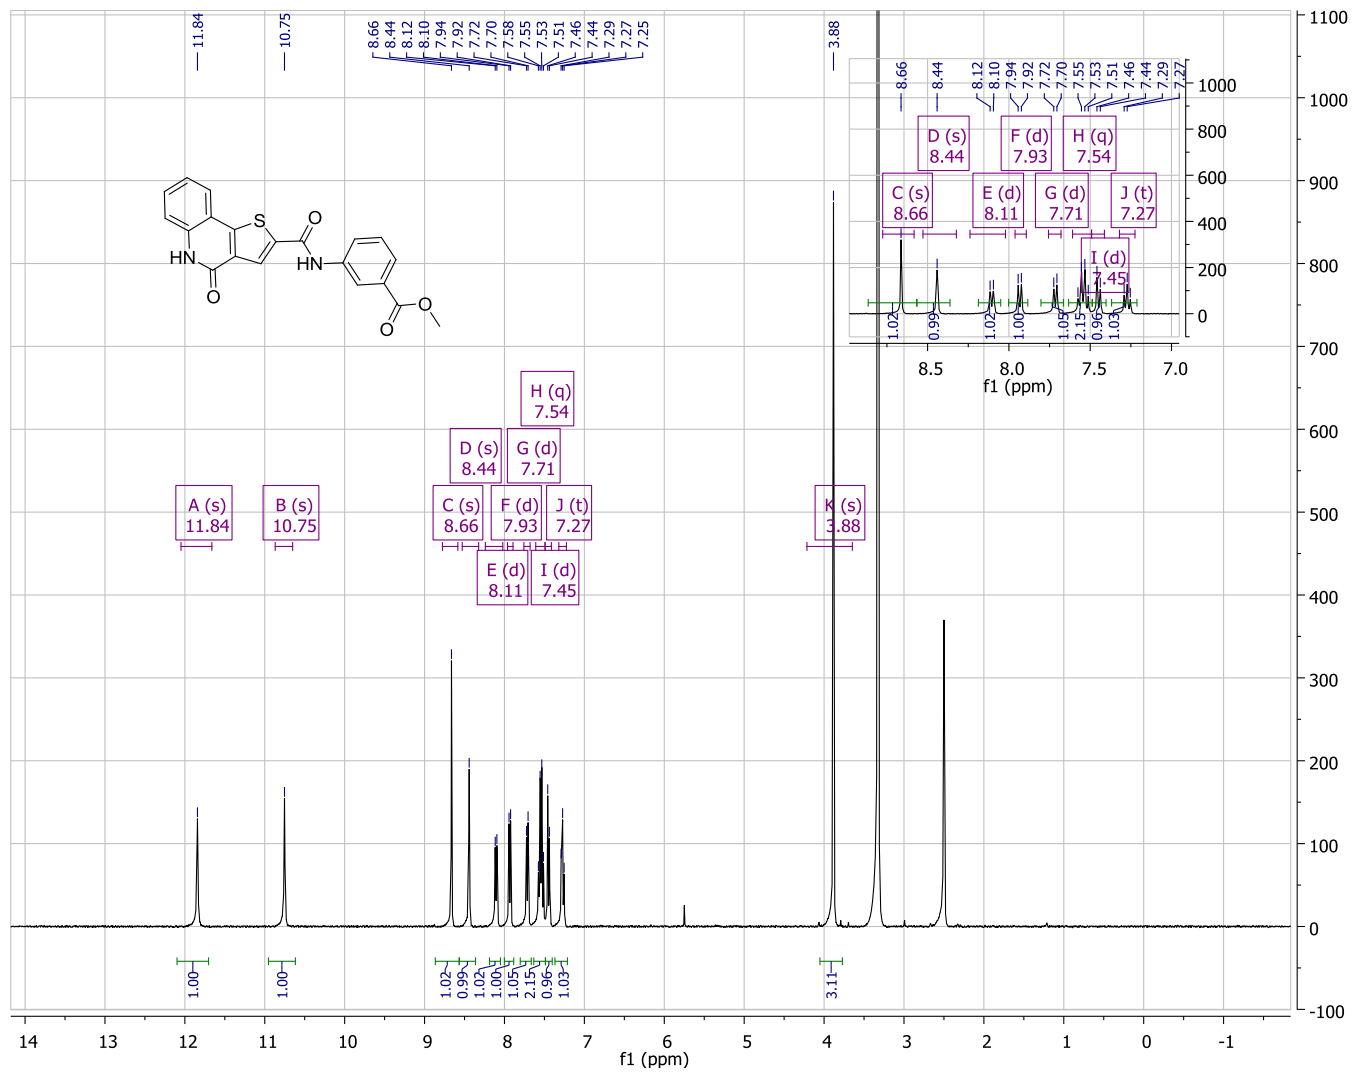

<sup>1</sup>H NMR spectrum of 25t

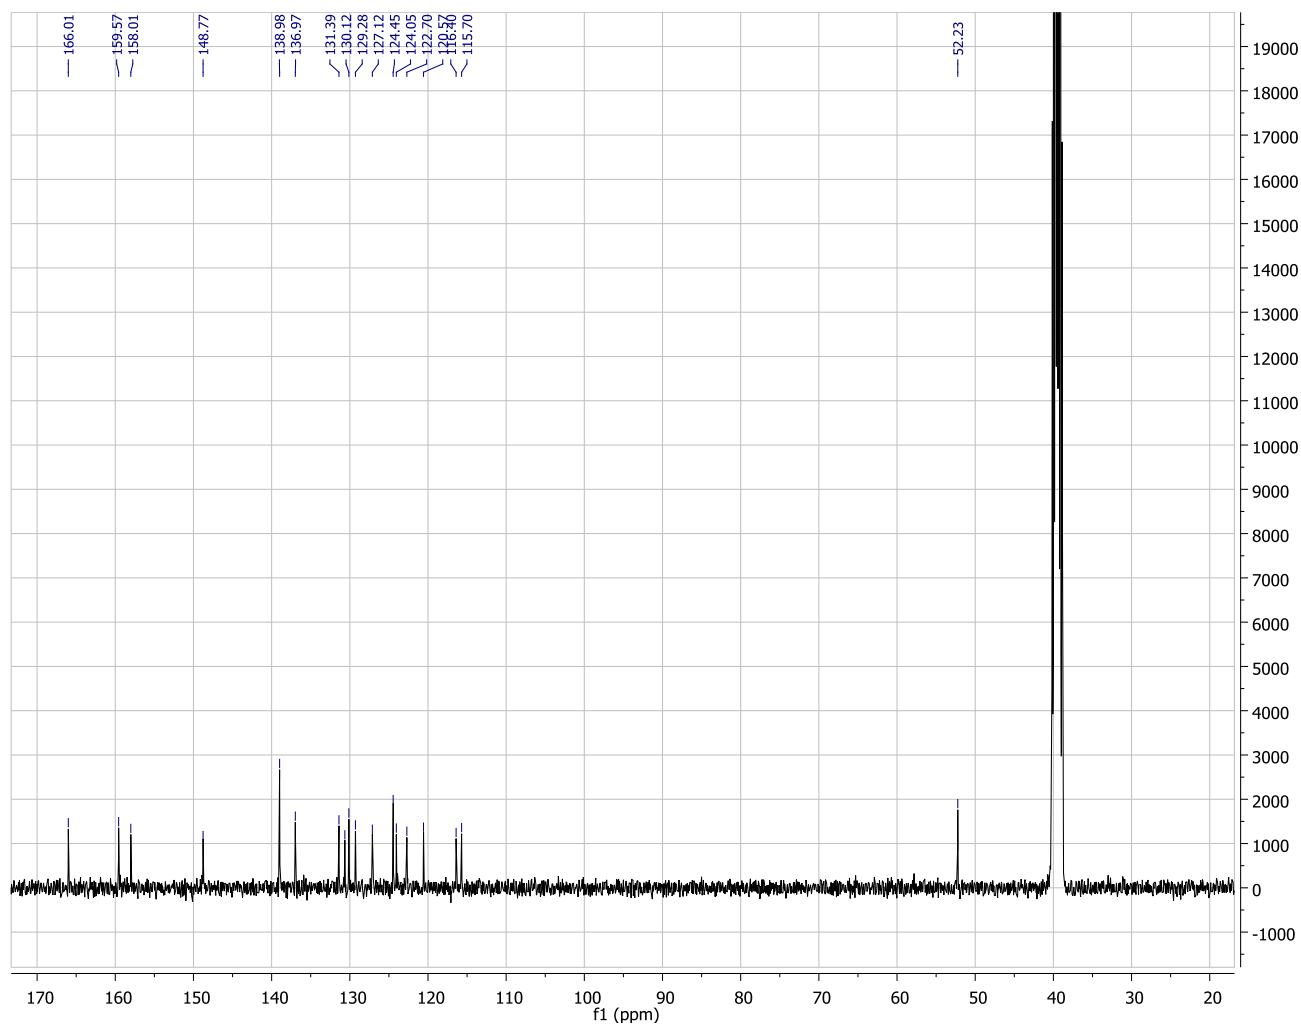

$^{13}\text{C}$  NMR spectrum of 25t



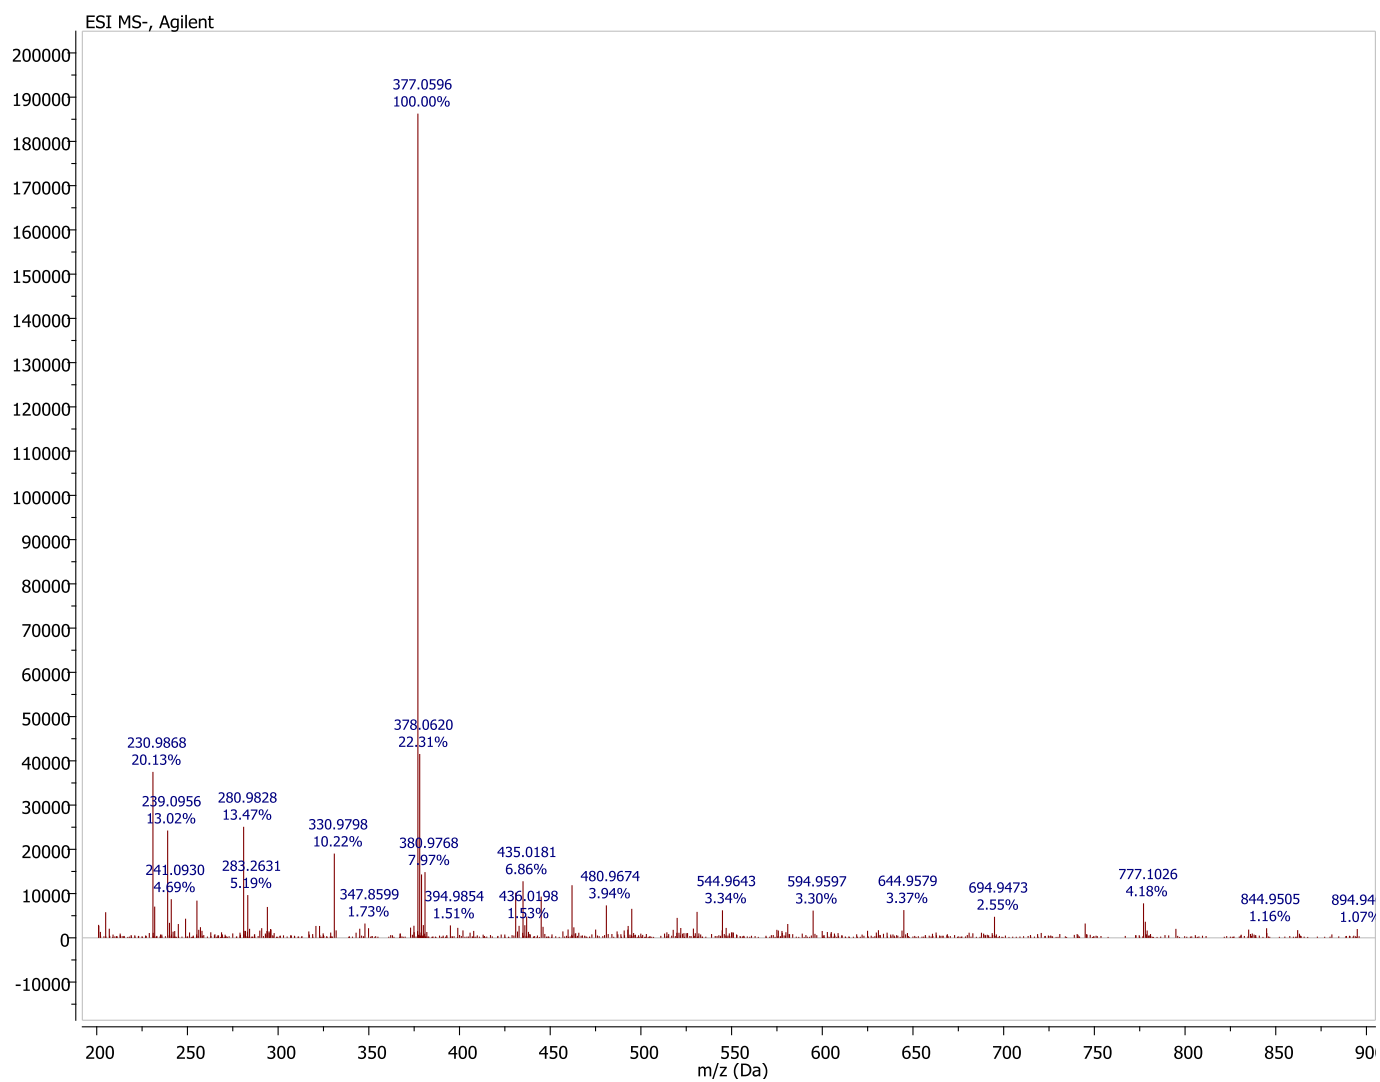

HRMS (TOF) of 25t

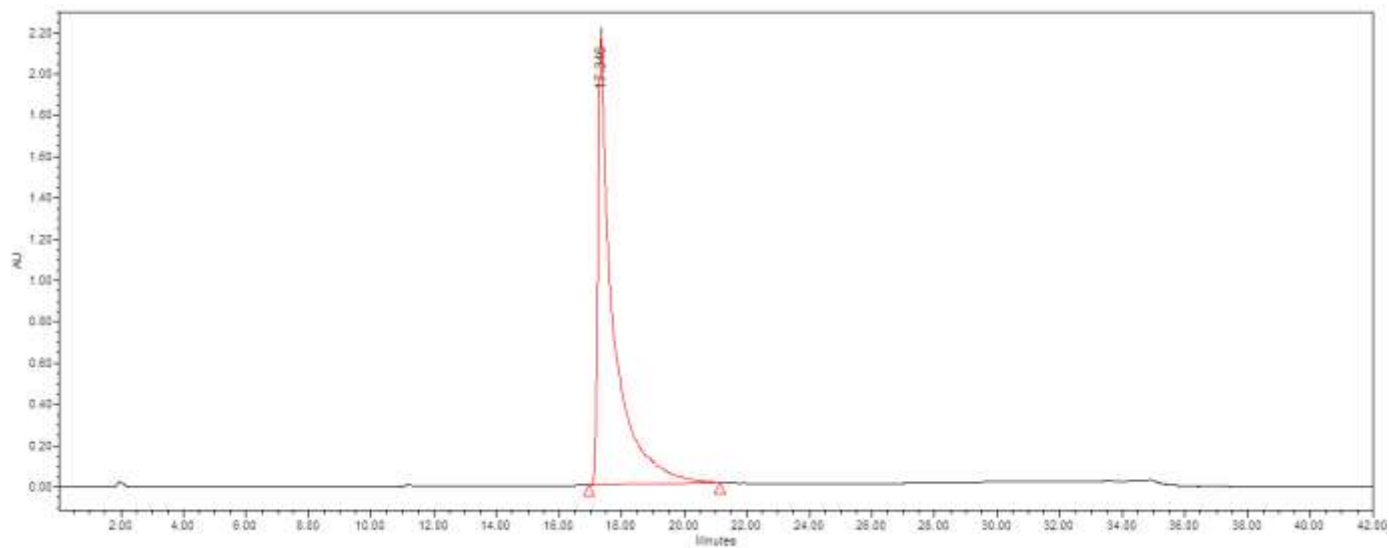

**HPLC scan of 25t**

| <b>Retention time (min)</b> | <b>% Area</b> |
|-----------------------------|---------------|
| 17.346                      | 100           |

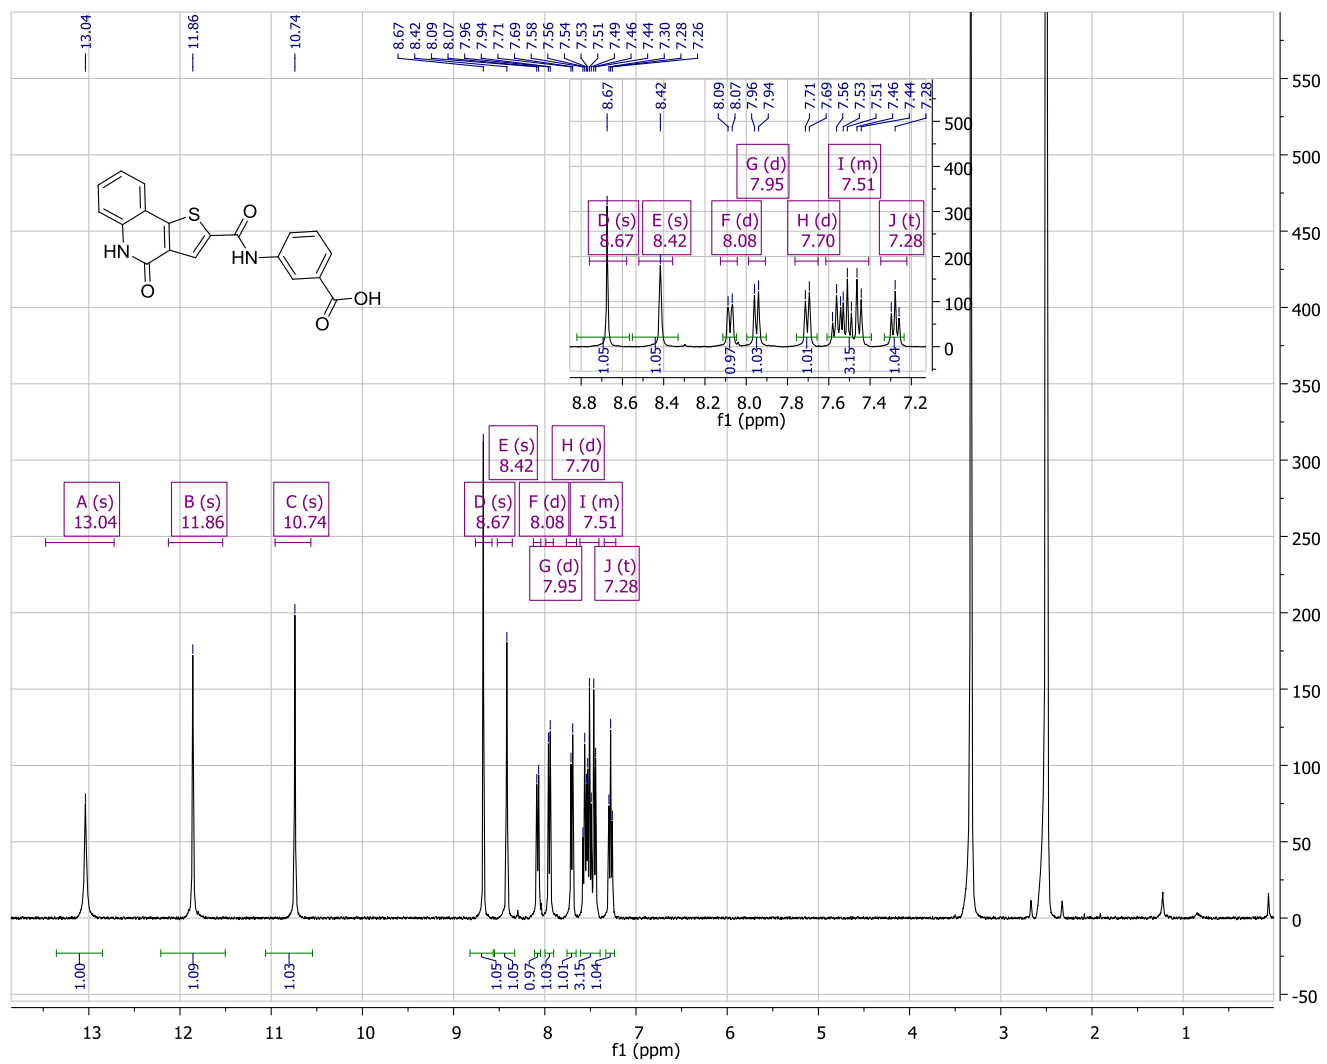

**<sup>1</sup>H NMR spectrum of 25u**

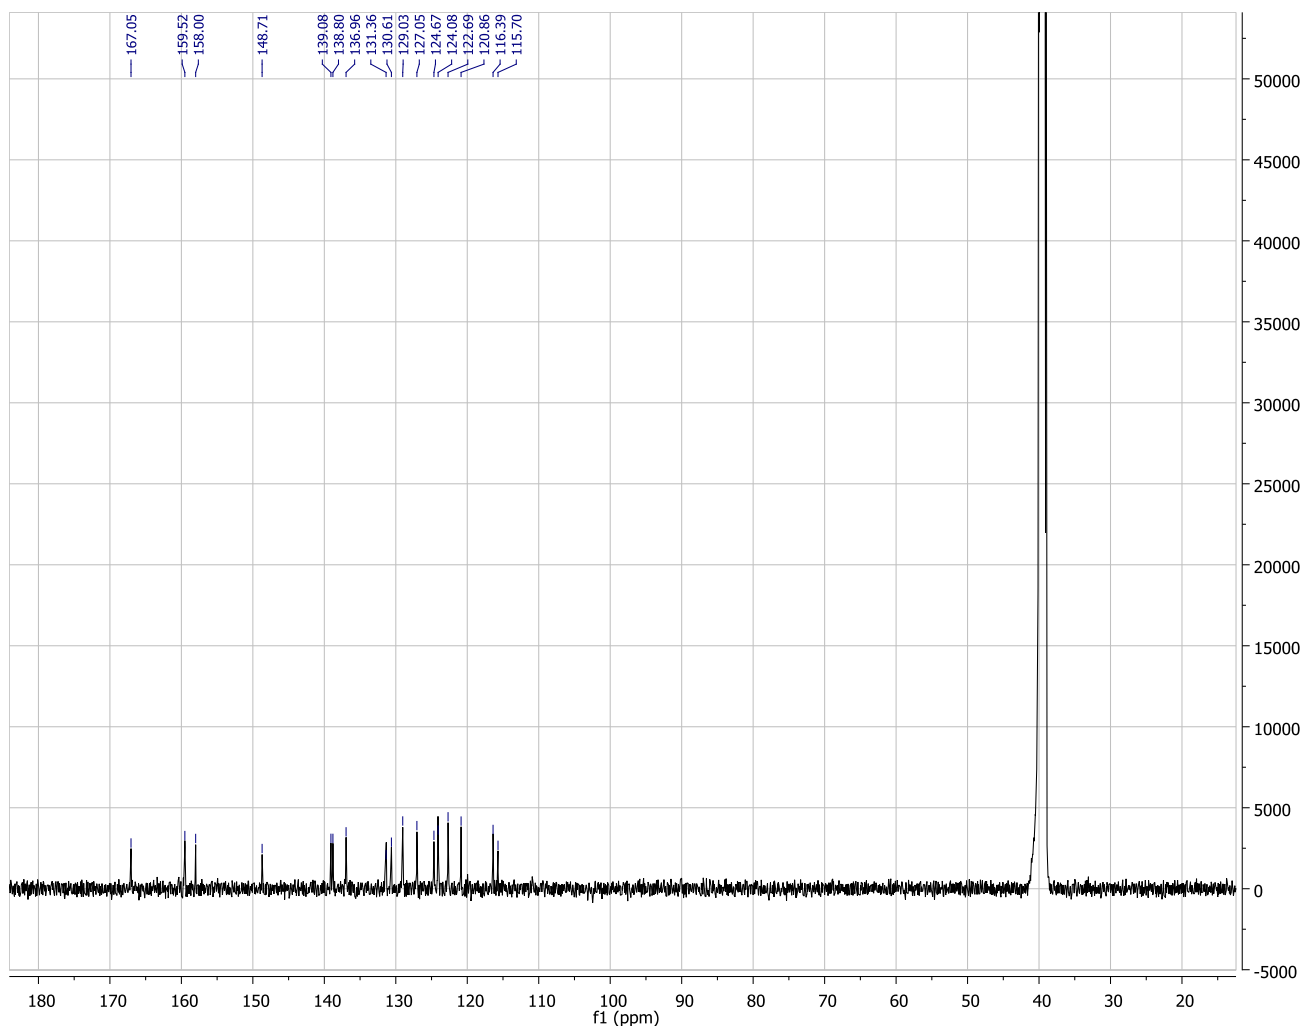

$^{13}\text{C}$  NMR spectrum of 25u

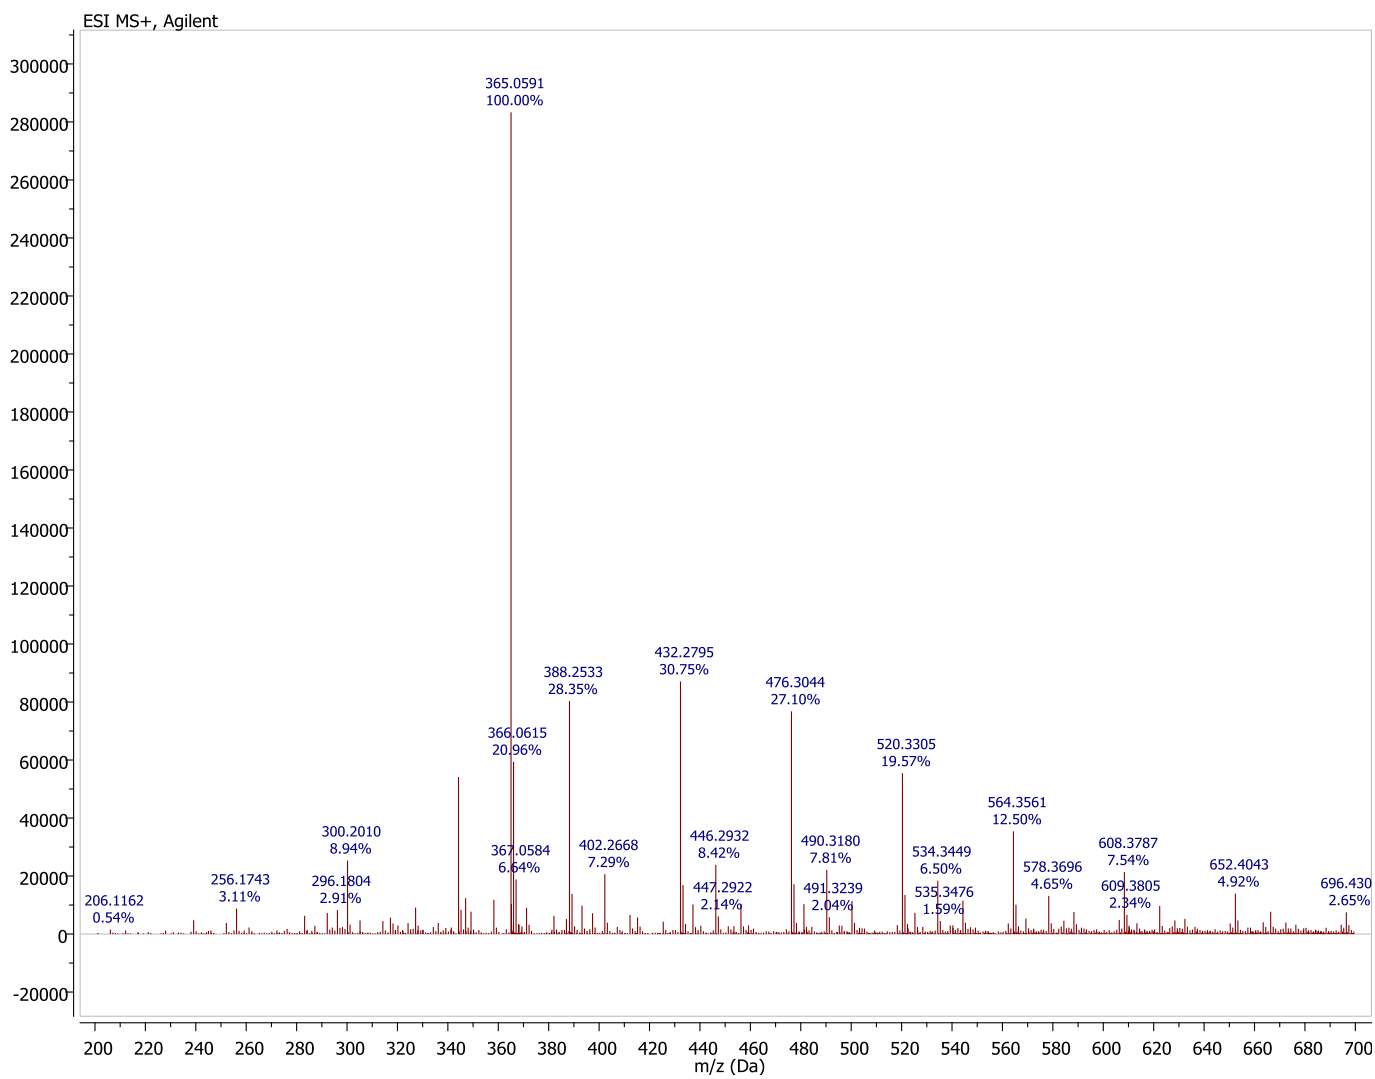

HRMS (TOF) of 25u

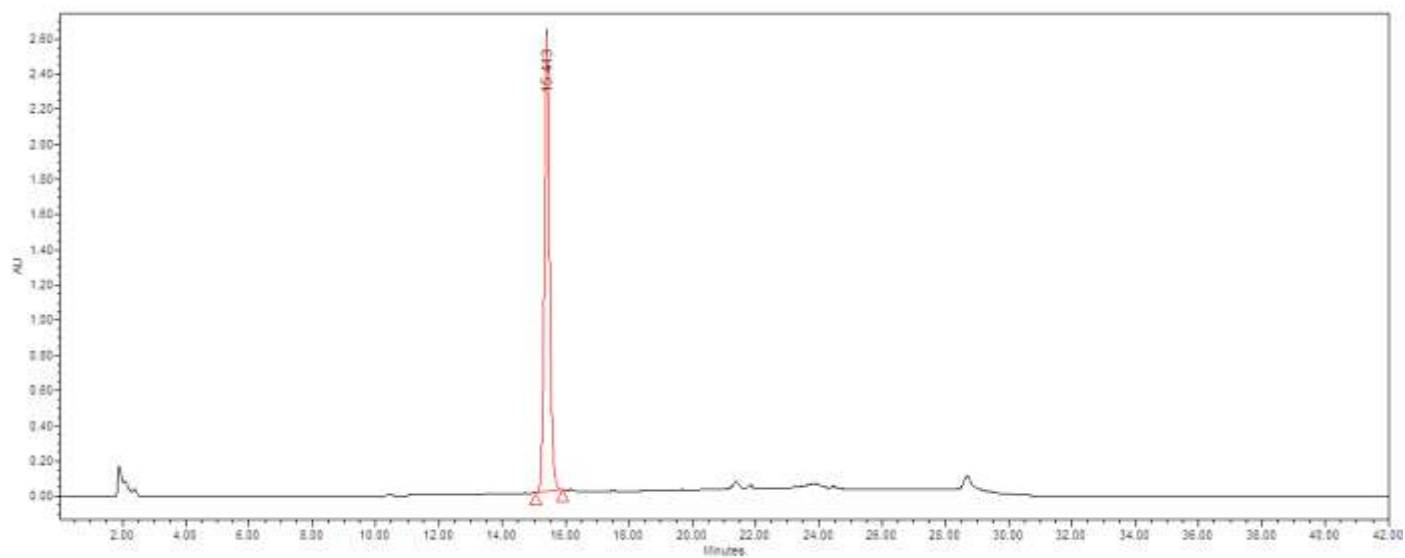

HPLC scan of 25u

| Retention time (min) | % Area |
|----------------------|--------|
| 15.413               | 100    |

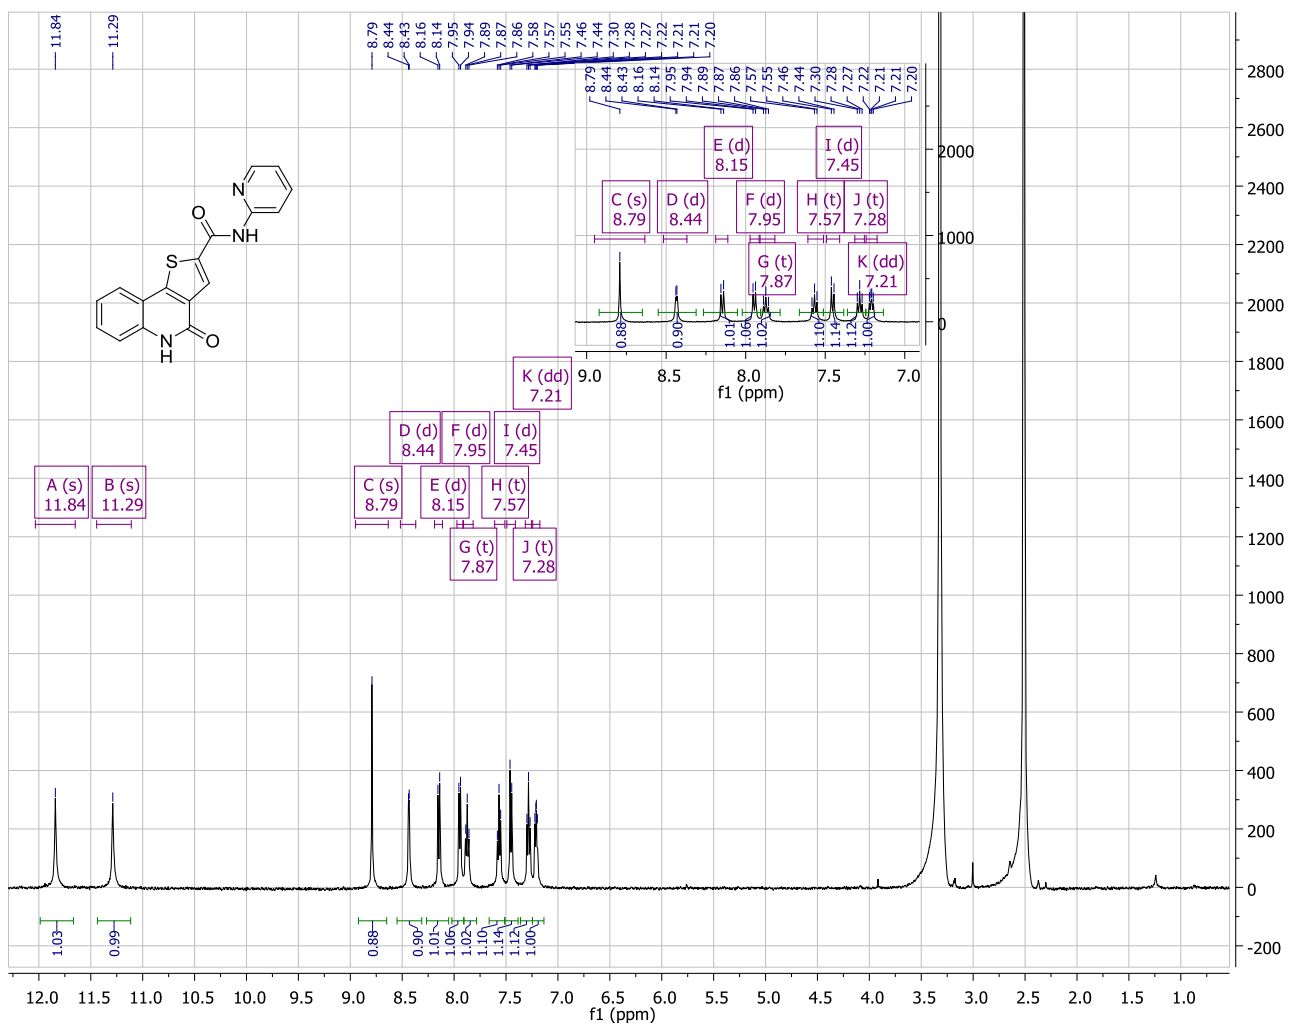

<sup>1</sup>H NMR spectrum of 25v

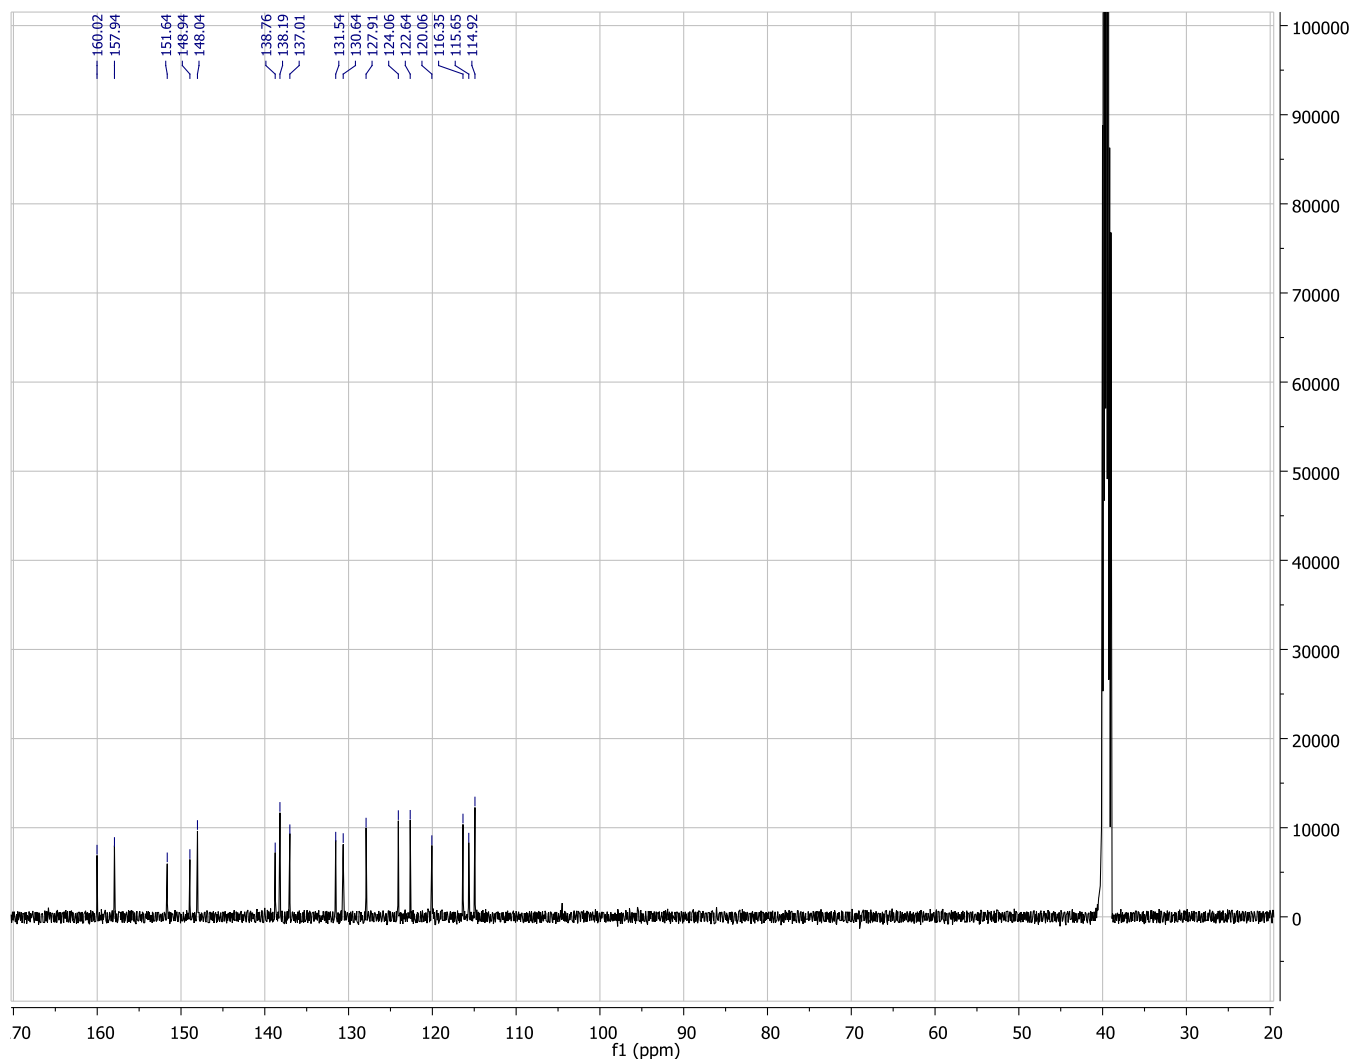

$^{13}\text{C}$  NMR spectrum of 25v



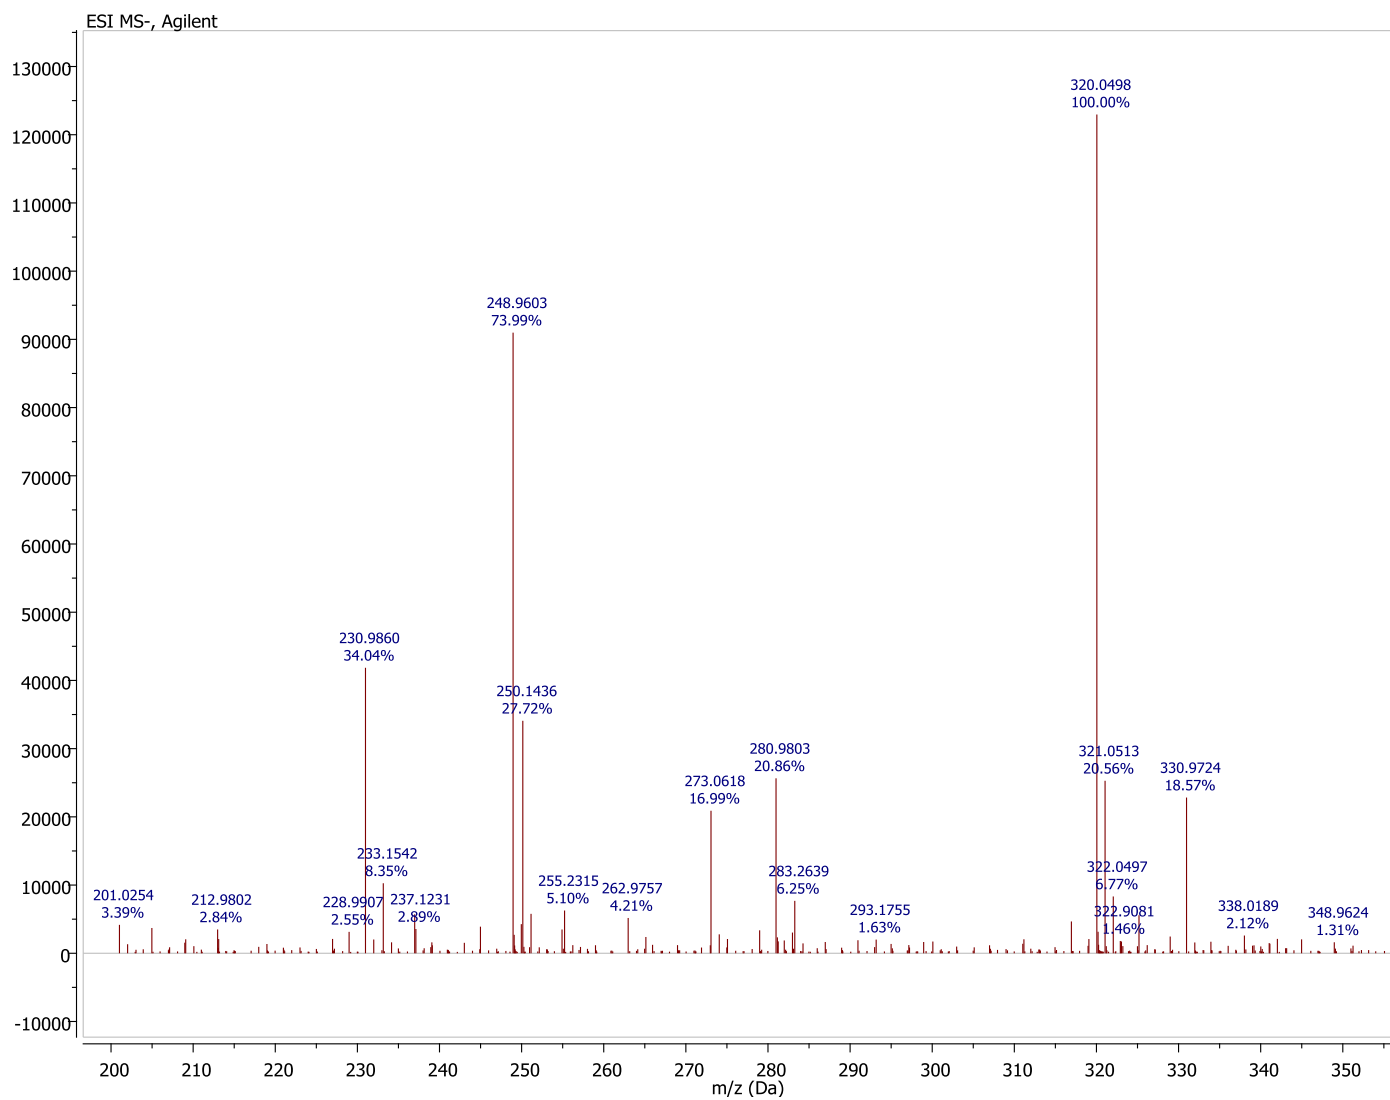

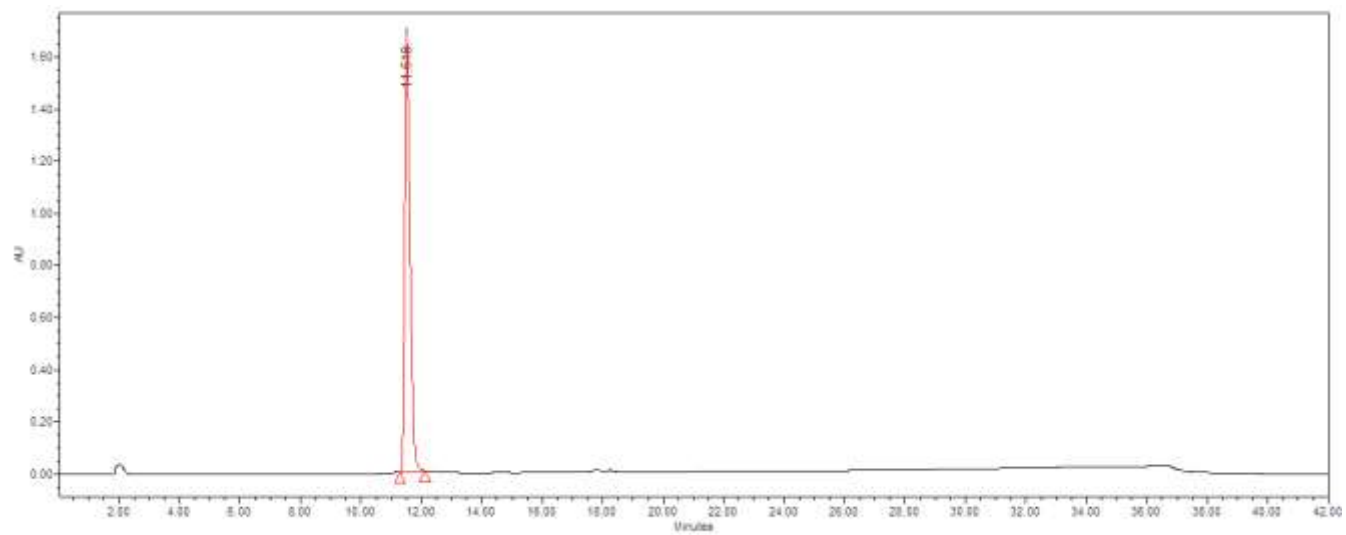

**HPLC scan of 25v**

| <b>Retention time (min)</b> | <b>% Area</b> |
|-----------------------------|---------------|
| 11.518                      | 100           |

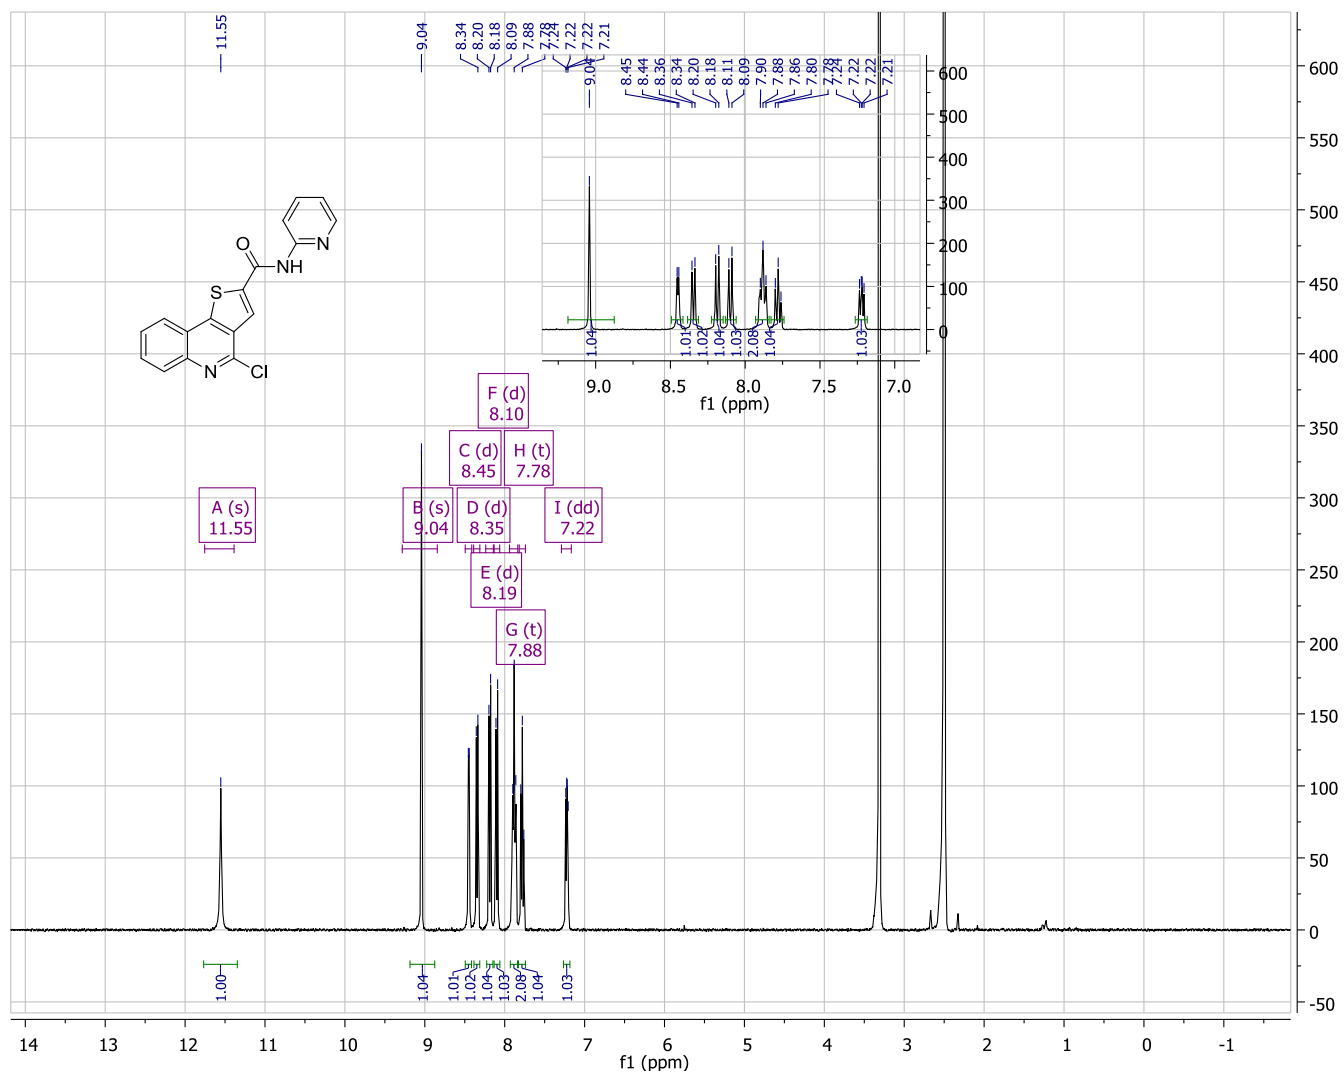

<sup>1</sup>H NMR spectrum of 25w

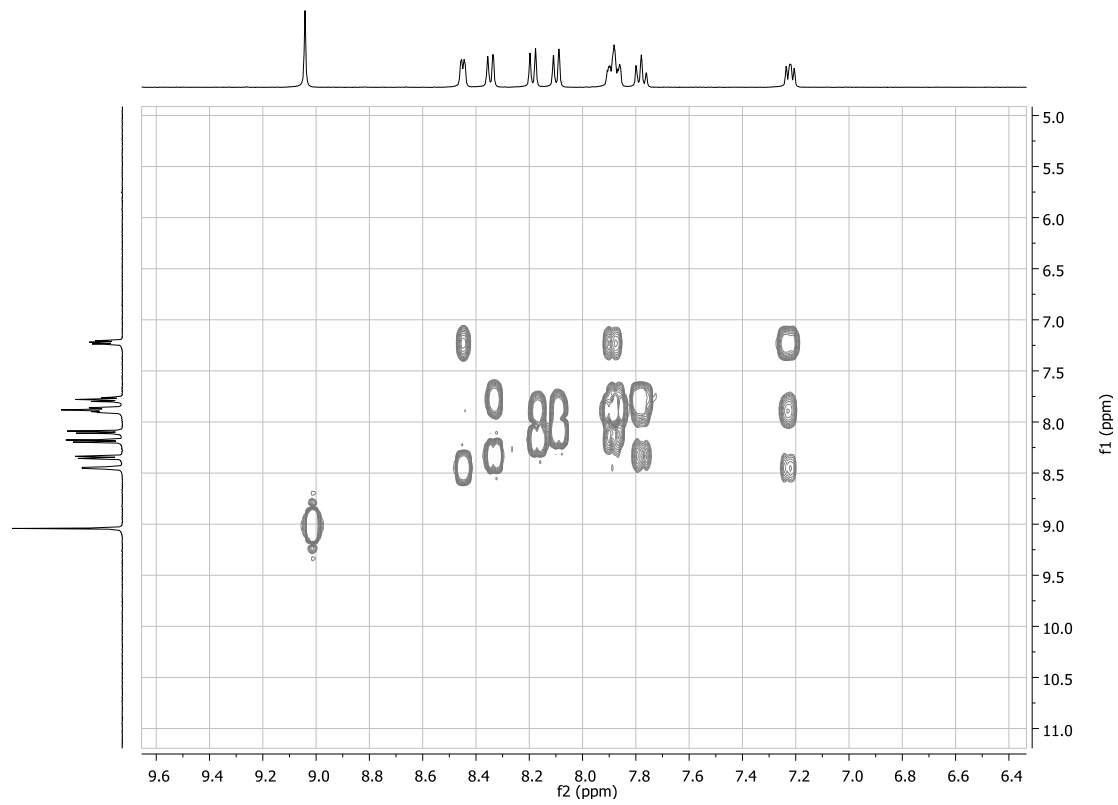

COSY spectrum of 25w

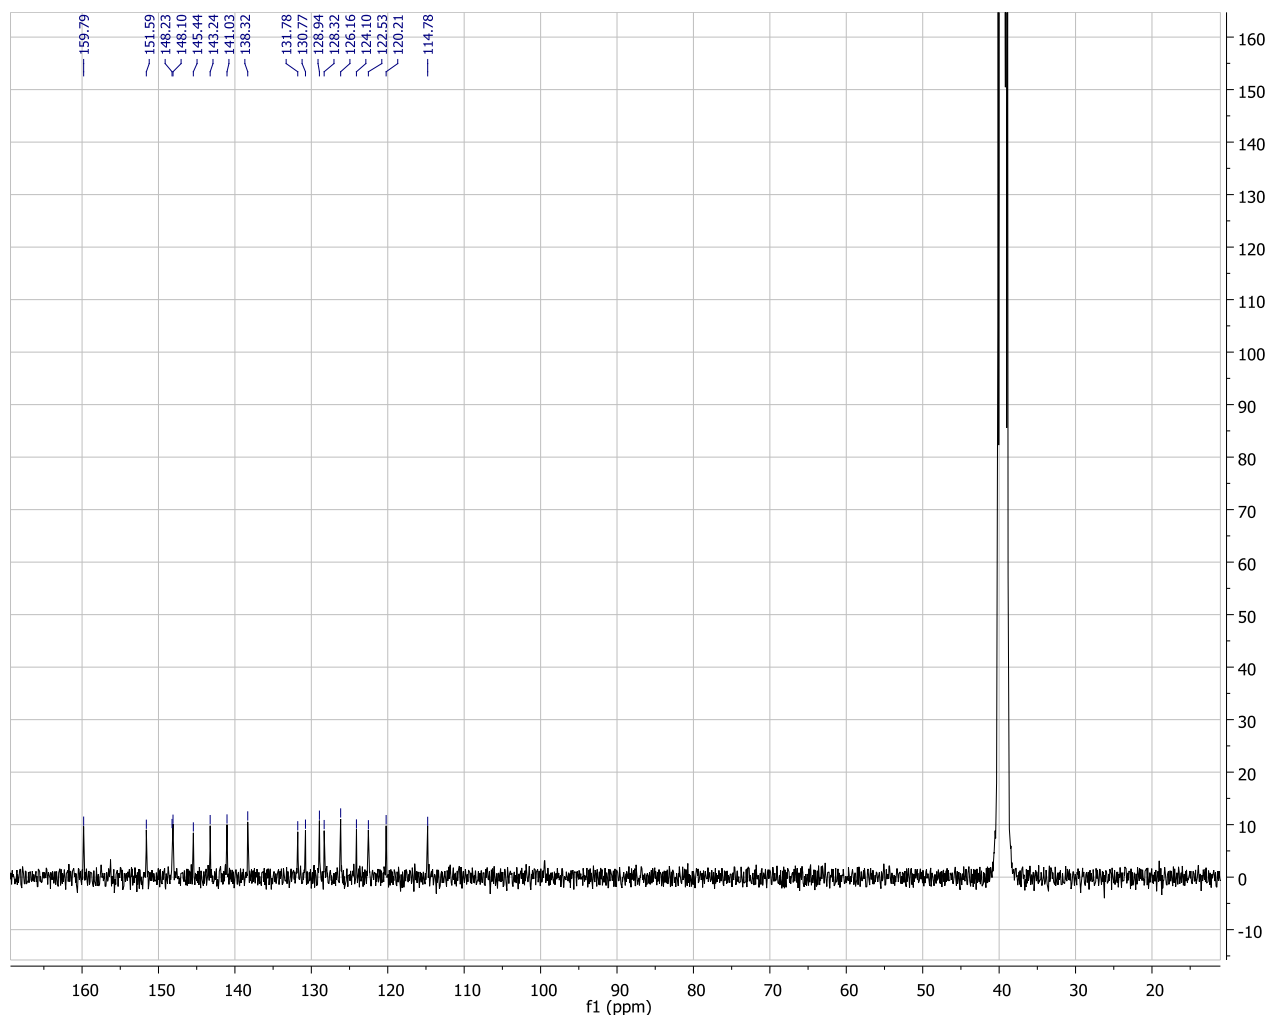

$^{13}\text{C}$  NMR spectrum of 25w

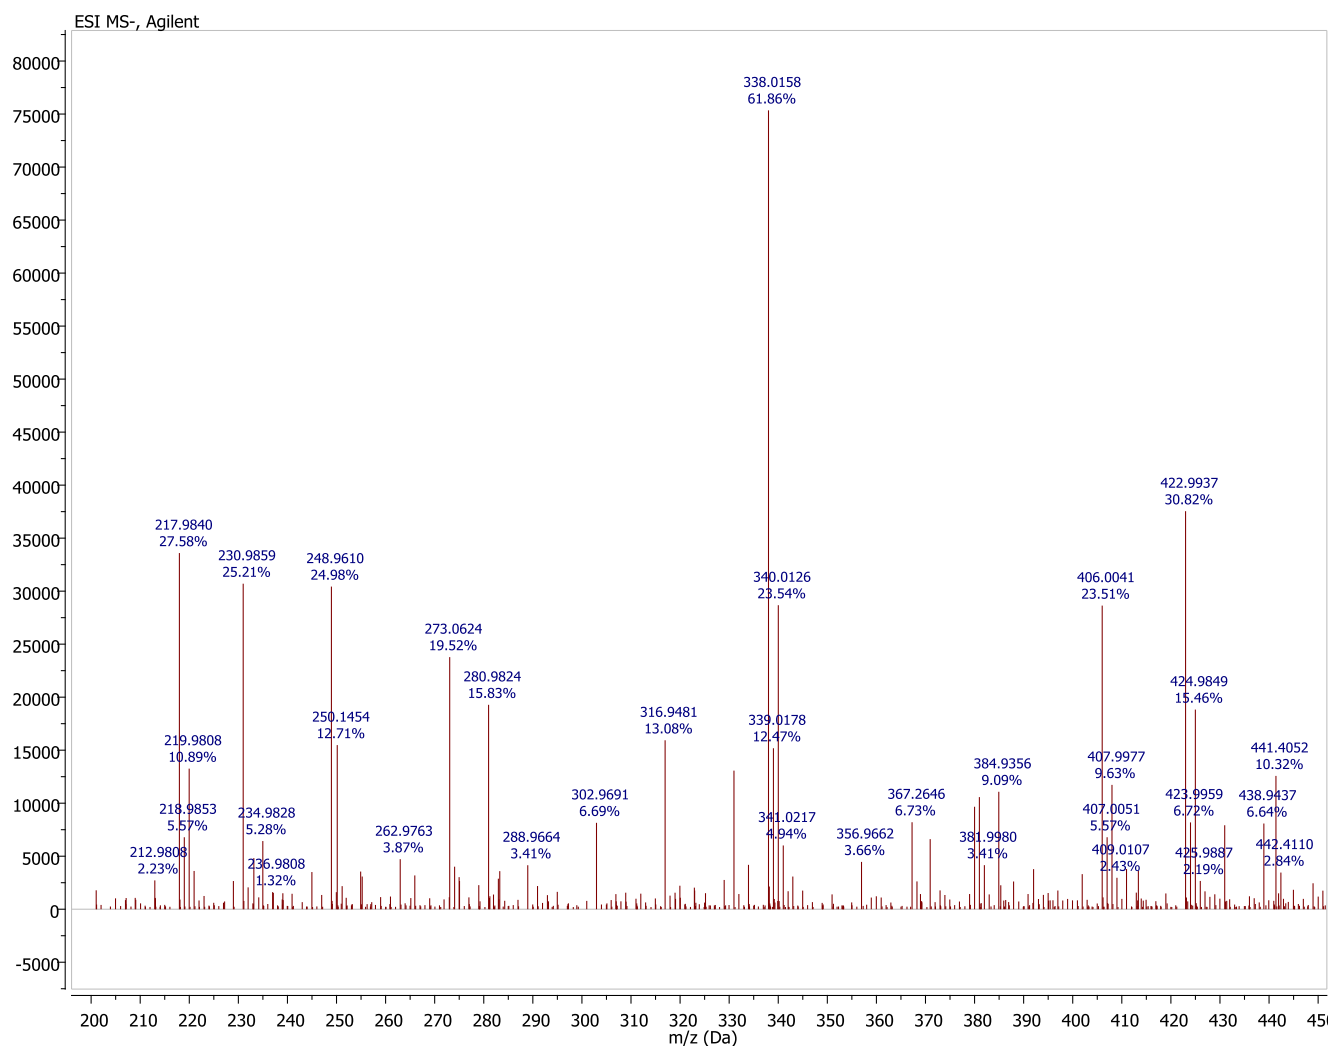

HRMS (TOF) of 25w

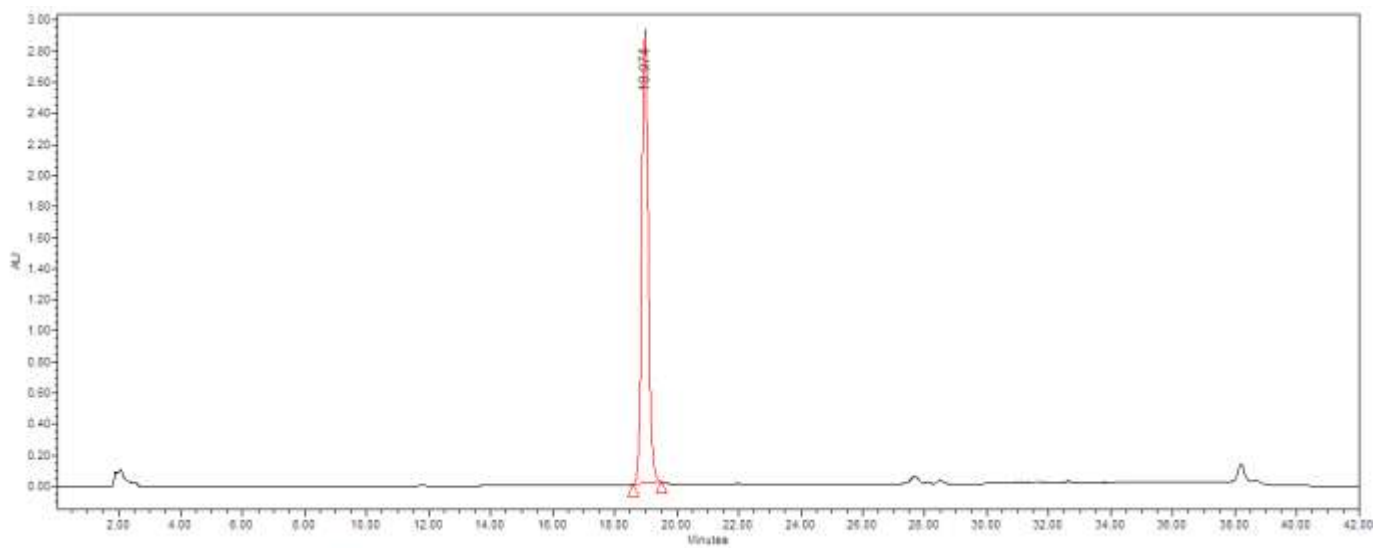

HPLC scan of 25w

| Retention time (min) | % Area |
|----------------------|--------|
| 18.974               | 97.52  |

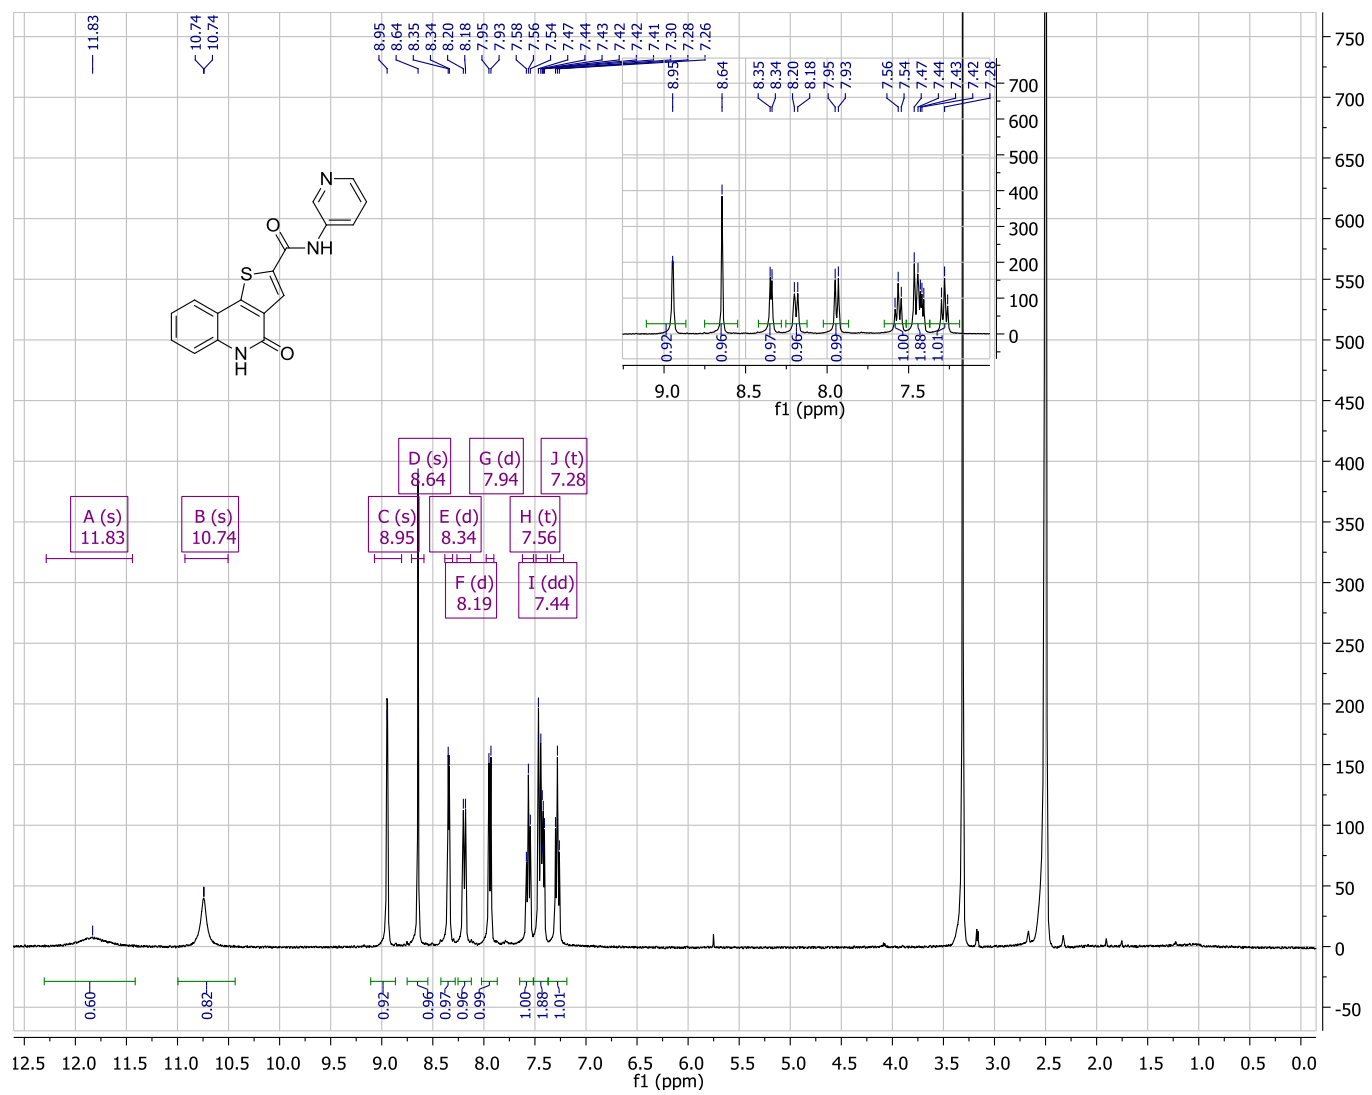

<sup>1</sup>H NMR spectrum of 25x



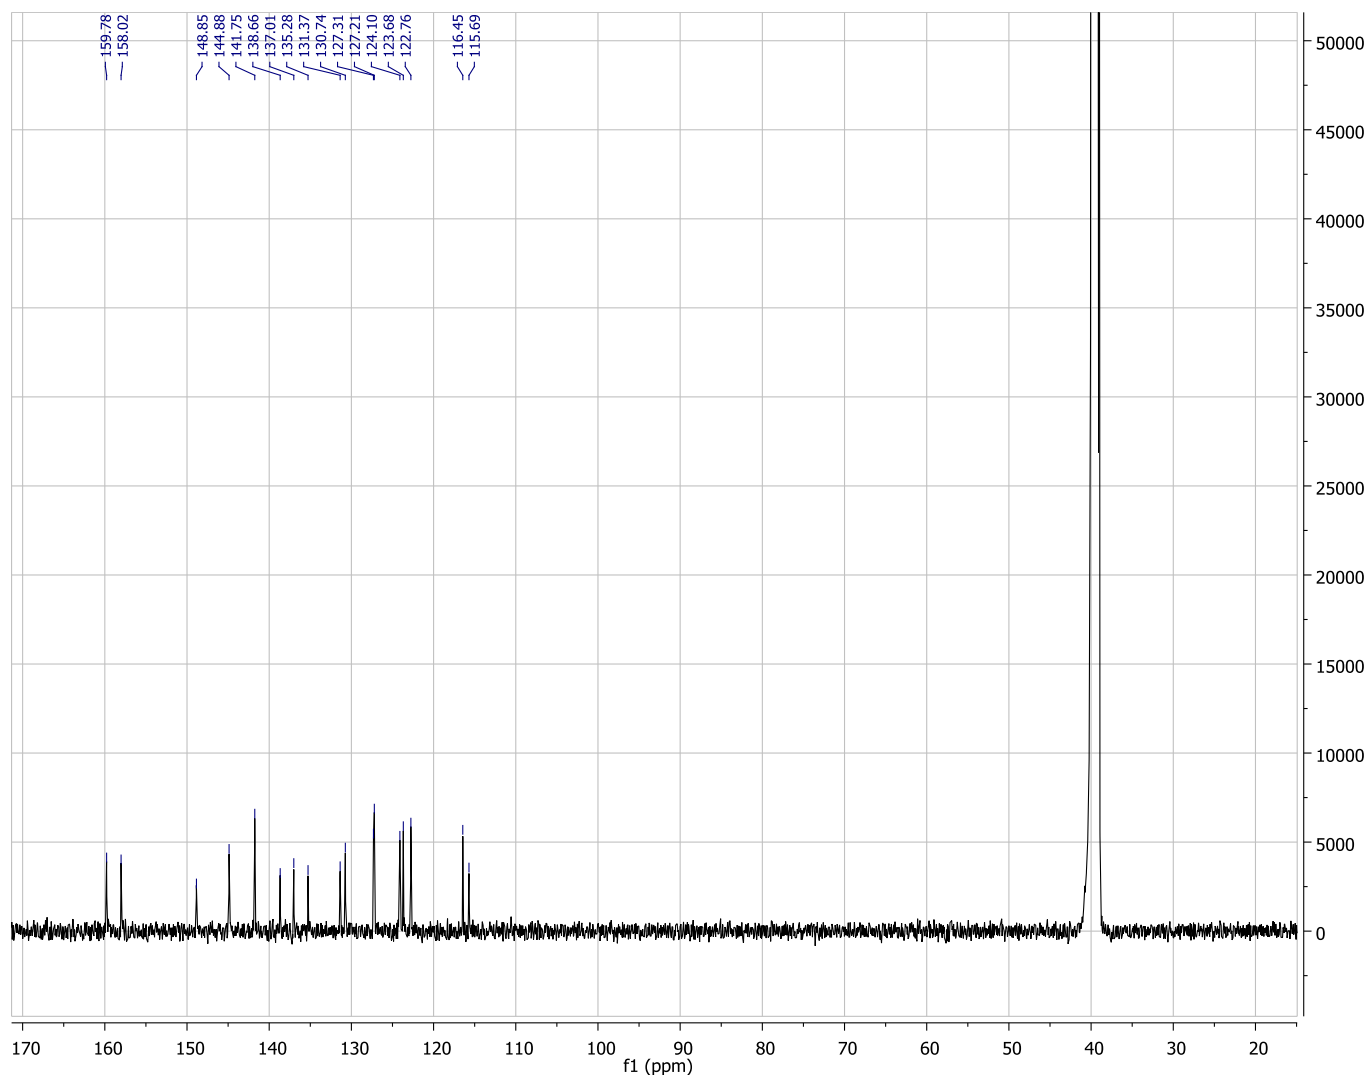

$^{13}\text{C}$  NMR spectrum of 25x

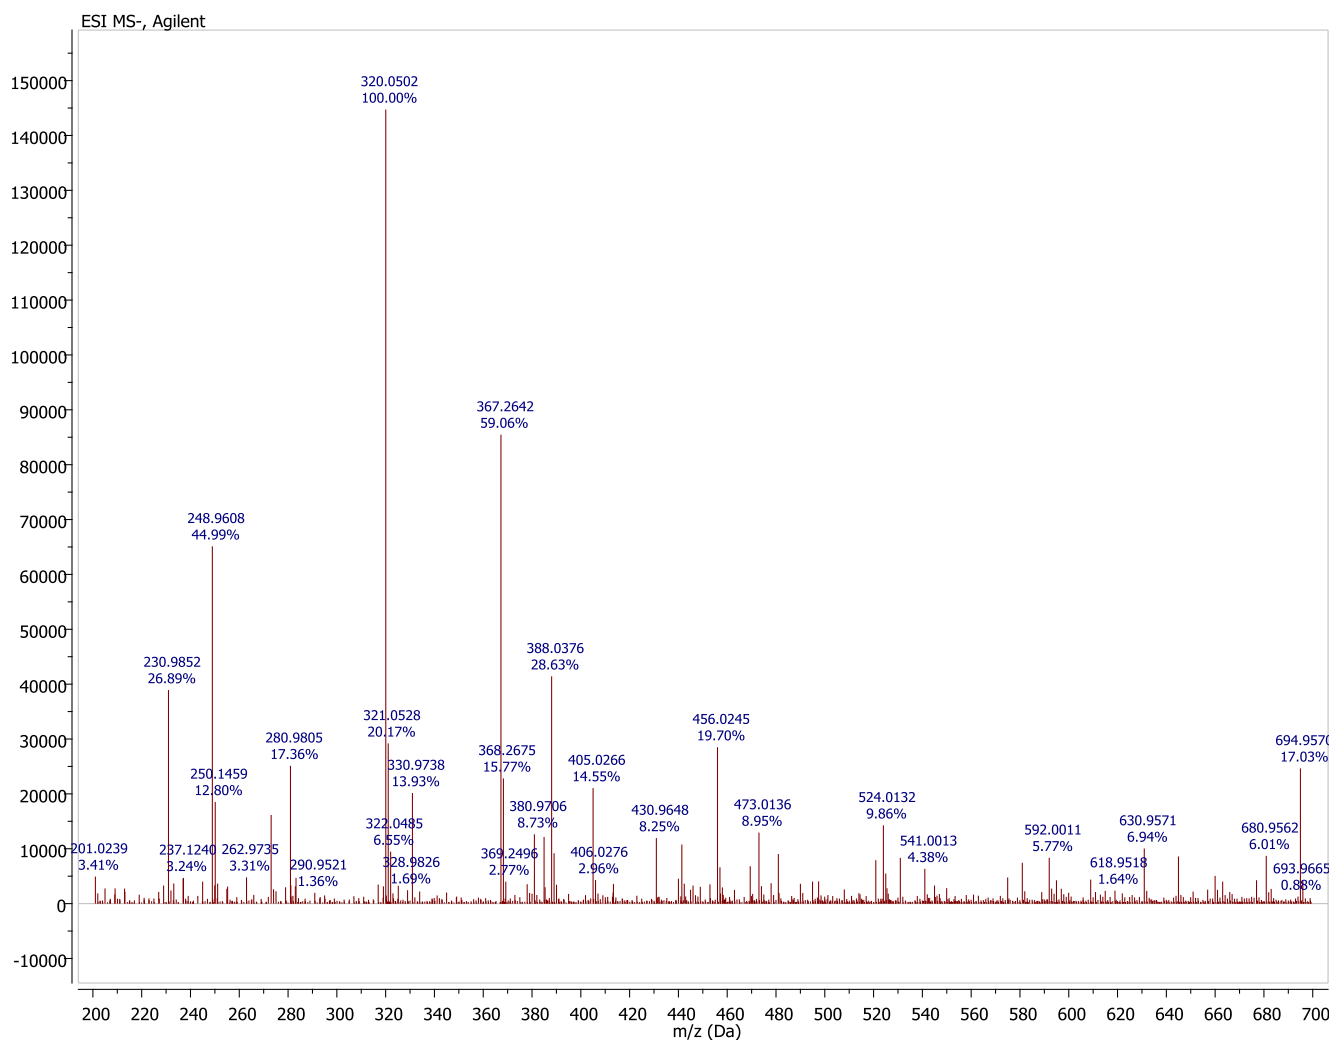

HRMS (TOF) of 25x

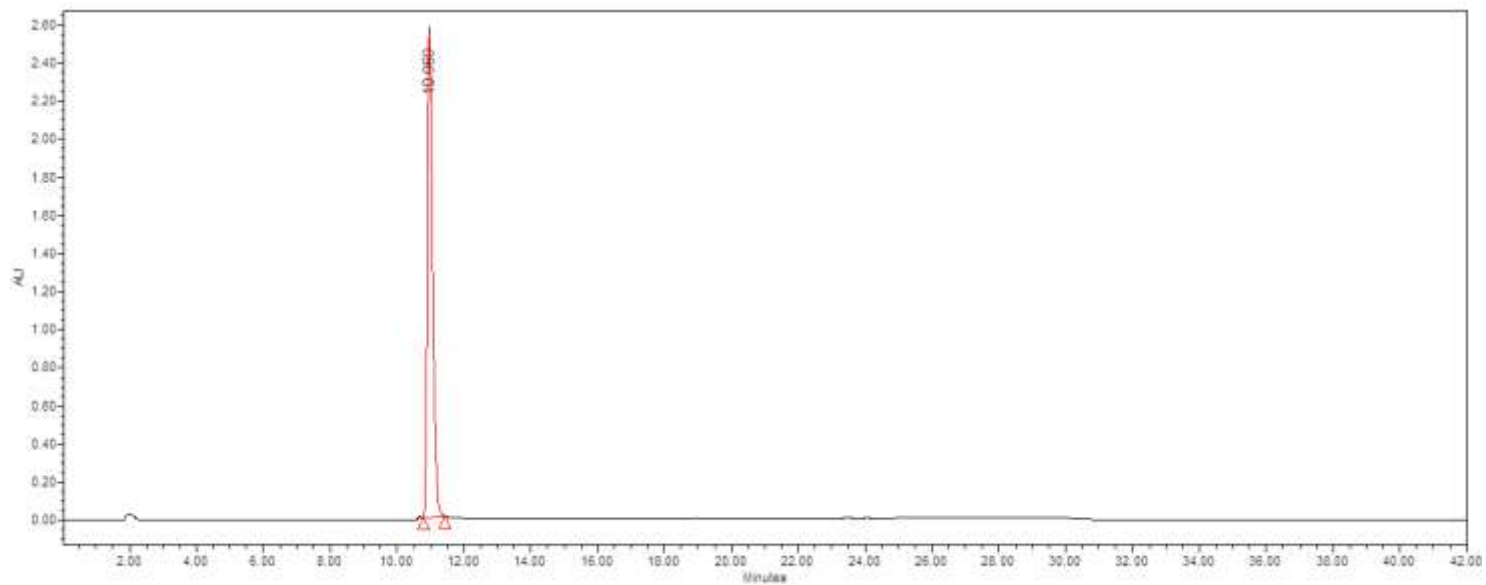

**HPLC scan of 25x**

| <b>Retention time (min)</b> | <b>% Area</b> |
|-----------------------------|---------------|
| 10.969                      | 100           |
